# Supplementary material for: Data Fusion of Fourier Transform Mid-Infrared (MIR) and Near-Infrared (NIR) Spectroscopies to Identify Geographical Origin of Wild Paris polyphylla var. yunnanensis
Source: PubMed Central journal article supplement (PMC6680555; doi:10.3390/molecules24142559), 2019-07-13
Supplement: molecules-24-02559-s001.pdf [file molecules-24-02559-s001.pdf]

# Data Fusion of Fourier Transform Mid-Infrared (MIR) and Near-Infrared (NIR) Spectroscopies to Identify Geographical Origin of Wild *Paris polyphylla* var. *yunnanensis*

Yi-Fei Pei <sup>1,2</sup>, Zhi-Tian Zuo <sup>1</sup>, Qing-Zhi Zhang <sup>2,\*</sup> and Yuan-Zhong Wang <sup>1,\*</sup>

<sup>1</sup> Institute of Medicinal Plants, Yunnan Academy of Agricultural Sciences, Kunming 650200, China

<sup>2</sup> College of Traditional Chinese Medicine, Yunnan University of Chinese Medicine, Kunming 650500, China

\* Corresponding author: boletus@126.com (Y.-Z.W.); ynkzqz@126.com (Q.-Z.Z.)

## Figure captions

- Figure S1 Plots of the permutation test of the FT-MIR PLS-DA model.
- Figure S2 The parameter optimization of random forest models for mid-level data fusion decision making before variables ranked by permutation accuracy importance: a,  $n_{\text{tree}}$  of the FT-MIR-RFE dataset; b,  $m_{\text{try}}$  of the FT-MIR-RFE dataset; c,  $n_{\text{tree}}$  of the NIR-RFE dataset; d,  $m_{\text{try}}$  of the NIR-RFE dataset.
- Figure S3 The parameter optimization of random forest models for high-level data fusion decision making before variables ranked by permutation accuracy importance: a,  $n_{\text{tree}}$  of the FT-MIR-PCs dataset; b,  $m_{\text{try}}$  of the FT-MIR-PCs dataset; c,  $n_{\text{tree}}$  of the NIR-PCs dataset; d,  $m_{\text{try}}$  of the NIR-PCs dataset.
- Figure S4 The 10-fold cross validation error rates of the RF model for high-level data fusion (sequentially reduce each five variables) based on total *P. yunnanensis* samples: a, FT-MIR dataset; b, NIR dataset.
- Figure S5 The parameter optimization of random forest models for high-level data fusion decision making before variables ranked by permutation accuracy importance: a,  $n_{\text{tree}}$  of the FT-MIR-RFE dataset; b,  $m_{\text{try}}$  of the FT-MIR-RFE dataset; c,  $n_{\text{tree}}$  of the NIR-RFE dataset; d,  $m_{\text{try}}$  of the NIR-RFE dataset.
- Figure S6 The parameter optimization of random forest models for high-level data fusion decision making before variables ranked by permutation accuracy importance: a,  $n_{\text{tree}}$  of the FT-MIR-Bo dataset; b,  $m_{\text{try}}$  of the FT-MIR-Bo dataset; c,  $n_{\text{tree}}$  of the NIR-Bo dataset; d,  $m_{\text{try}}$  of the NIR-Bo dataset.
- Figure S7 The important variables of Boruta method and RFE method of random forest models based on the total *P. yunnanensis* samples: a, b, the FT-MIR dataset; c, d, the NIR dataset.
- Figure S8 The parameter optimization of random forest models for low-level data fusion decision making after variables ranked by permutation accuracy importance: a,  $n_{\text{tree}}$  of the FT-MIR-RFE dataset; b,  $m_{\text{try}}$  of the FT-MIR-RFE dataset; c,  $n_{\text{tree}}$  of the NIR-RFE dataset; d,  $m_{\text{try}}$  of the NIR-RFE dataset.
- Figure S9 The VIP scores plot of PLS-DA model based on the total *P. yunnanensis* samples.
- Figure S10 The parameter optimization of random forest models of mid-level data fusion decision making after variables ranked by permutation accuracy importance: a,  $n_{\text{tree}}$  of the mid-level-PCs dataset; b,  $m_{\text{try}}$  of the mid-level-PCs dataset; c,  $n_{\text{tree}}$  of the mid-level-RFE dataset; d,  $m_{\text{try}}$  of the mid-level-RFE dataset; e,  $n_{\text{tree}}$  of the mid-level-Bo dataset; f,  $m_{\text{try}}$  of the mid-level-Bo dataset.

## Table captions

Table S1 The major parameters of raw and preprocessing calibration models based on *P. yunnanensis* samples combined with FT-MIR and NIR spectra.

Table S2 The tree votes of FT-MIR-PCs and NIR-PCs RF model in calibration set.

Table S3 The tree votes of FT-MIR-PCs and NIR-PCs RF model in validation set.

Table S4 The tree votes of FT-MIR-PCs and NIR-PCs PLS-DA model in calibration set.

Table S5 The tree votes of FT-MIR-PCs and NIR-PCs PLS-DA model in validation set.

Table S6 The tree votes of FT-MIR-RFE and NIR-RFE RF model in calibration set.

Table S7 The tree votes of FT-MIR-RFE and NIR-RFE RF model in validation set.

Table S8 The tree votes of FT-MIR-RFE and NIR-RFE PLS-DA model in calibration set.

Table S9 The tree votes of FT-MIR-RFE and NIR-RFE PLS-DA model in validation set.

Table S10 The tree votes of FT-MIR-Bo and NIR-Bo RF model in calibration set.

Table S11 The tree votes of FT-MIR-Bo and NIR-Bo RF model in validation set.

Table S12 The tree votes of FT-MIR-Bo and NIR-Bo PLS-DA model in calibration set.

Table S13 The tree votes of FT-MIR-Bo and NIR-Bo PLS-DA model in validation set.

Table S14 Class assignation of *P. yunnanensis* samples using fuzzy set theory in high-level data fusion.

Table S15 The geographical location of wild *P. yunnanensis* samples.

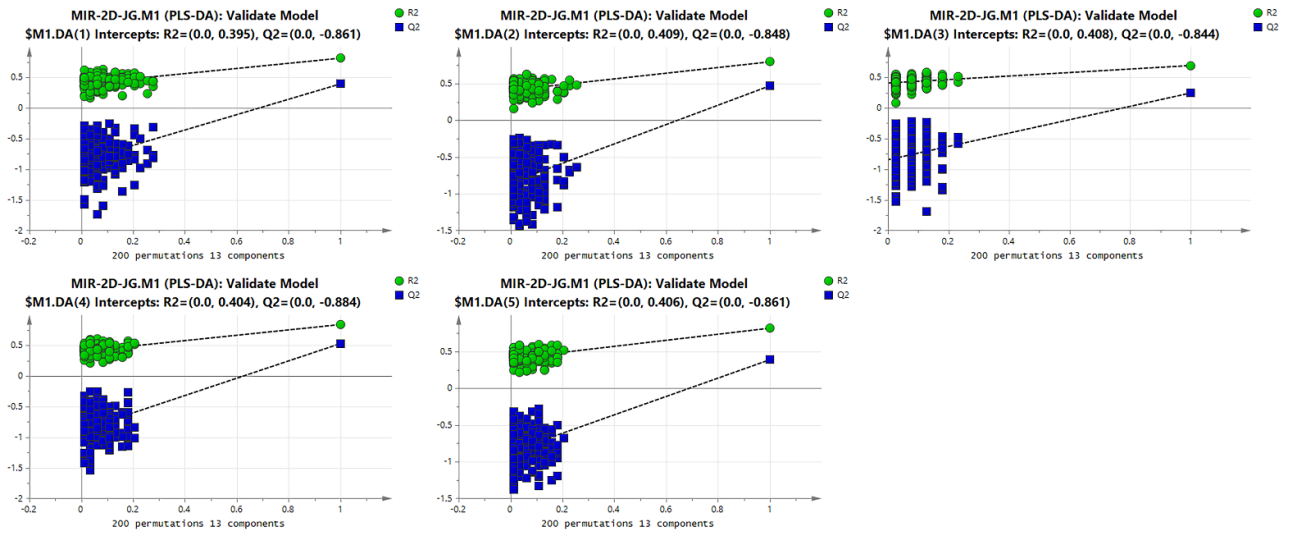

Fig. S1

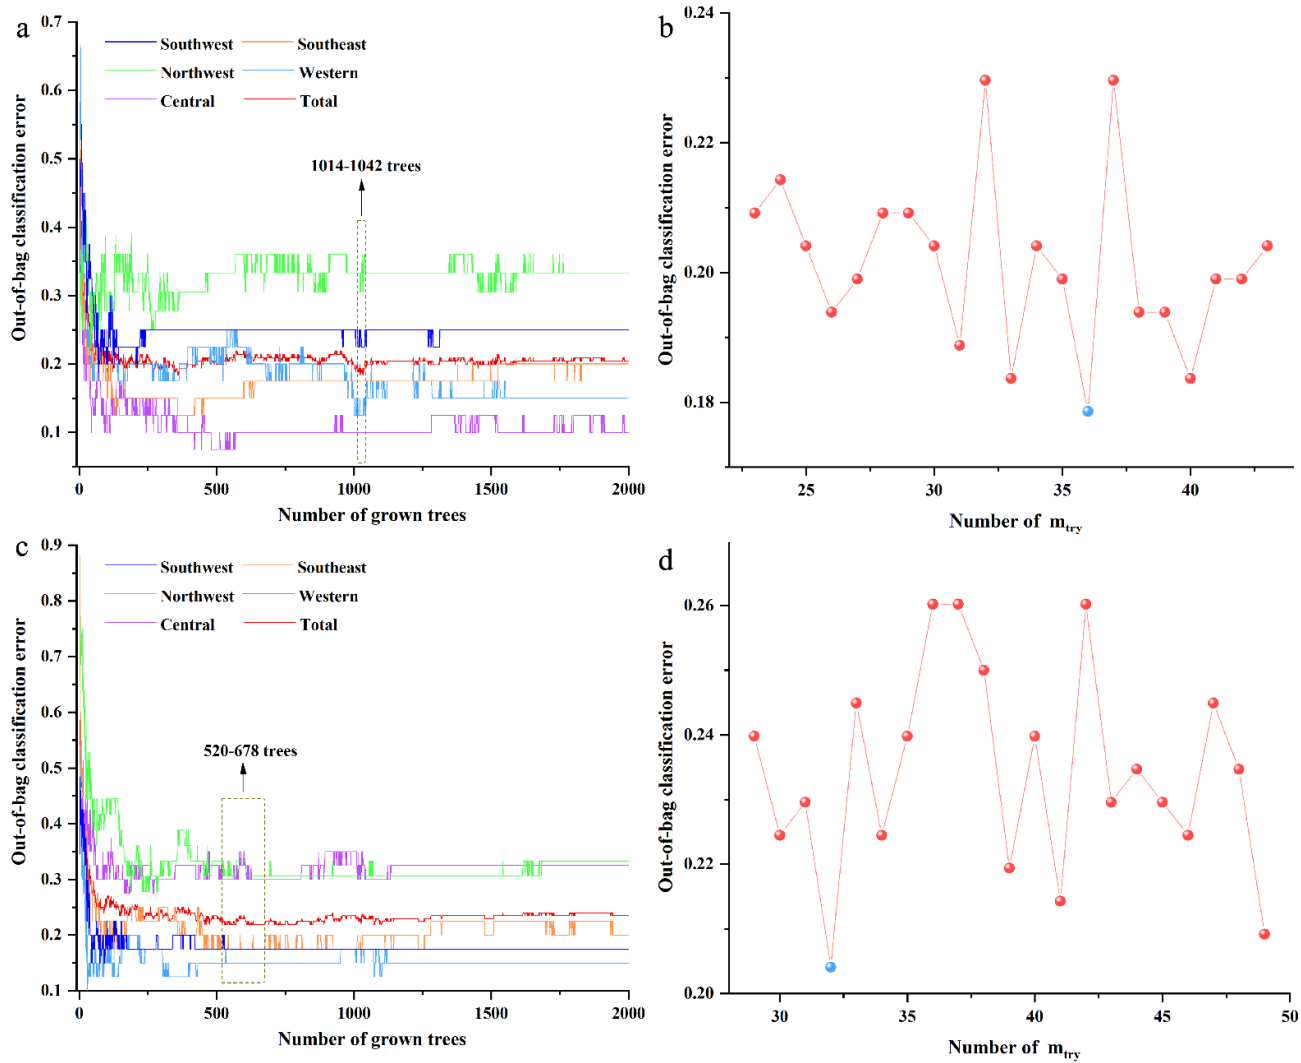

Fig. S2

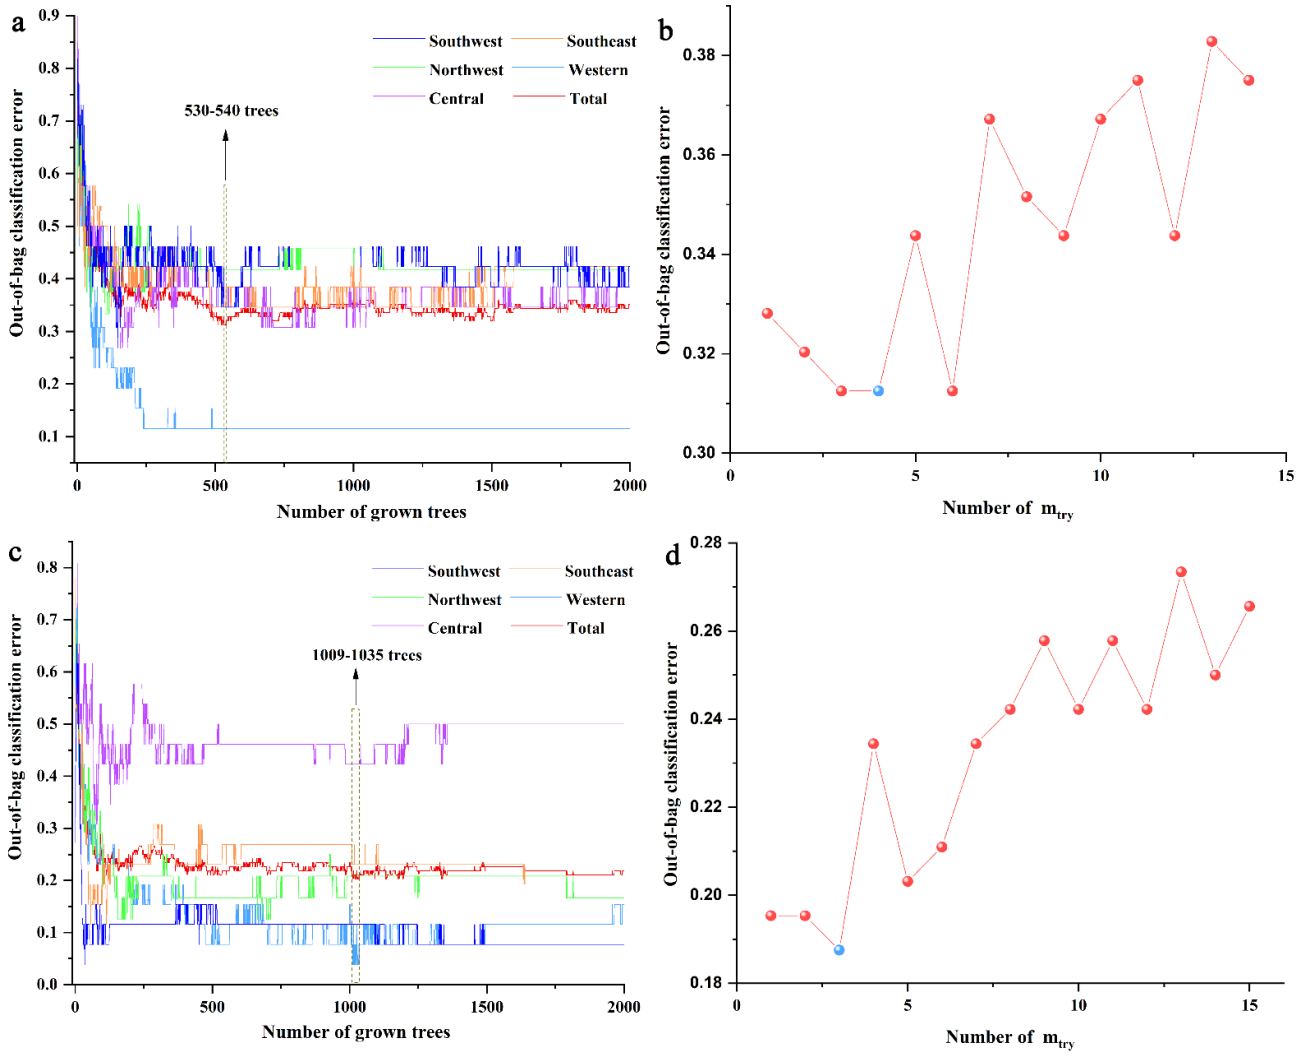

Fig. S3

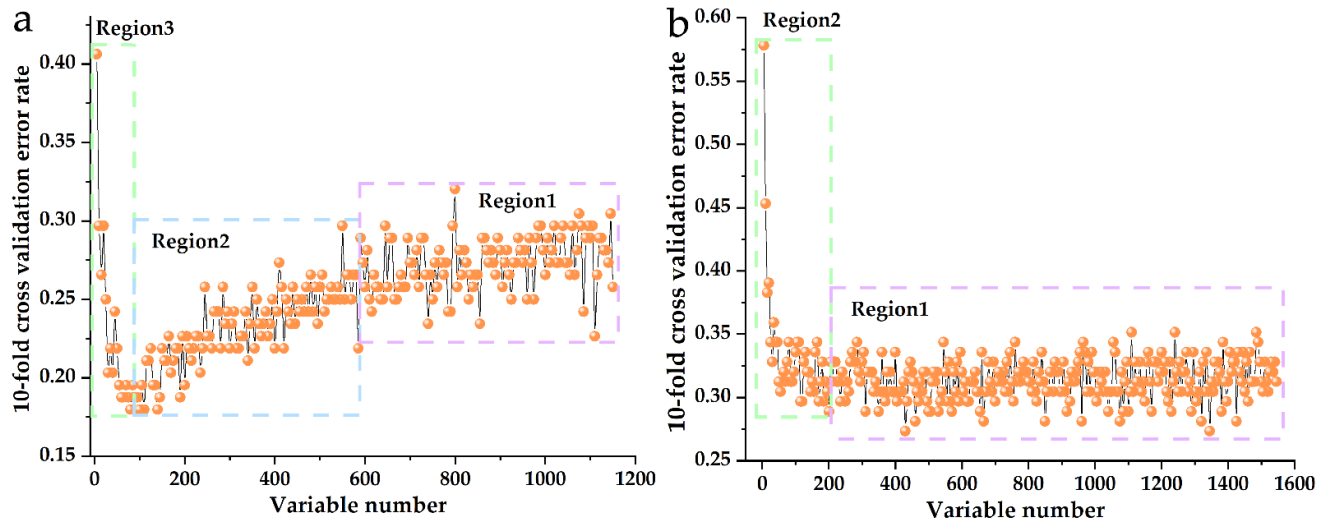

Fig. S4

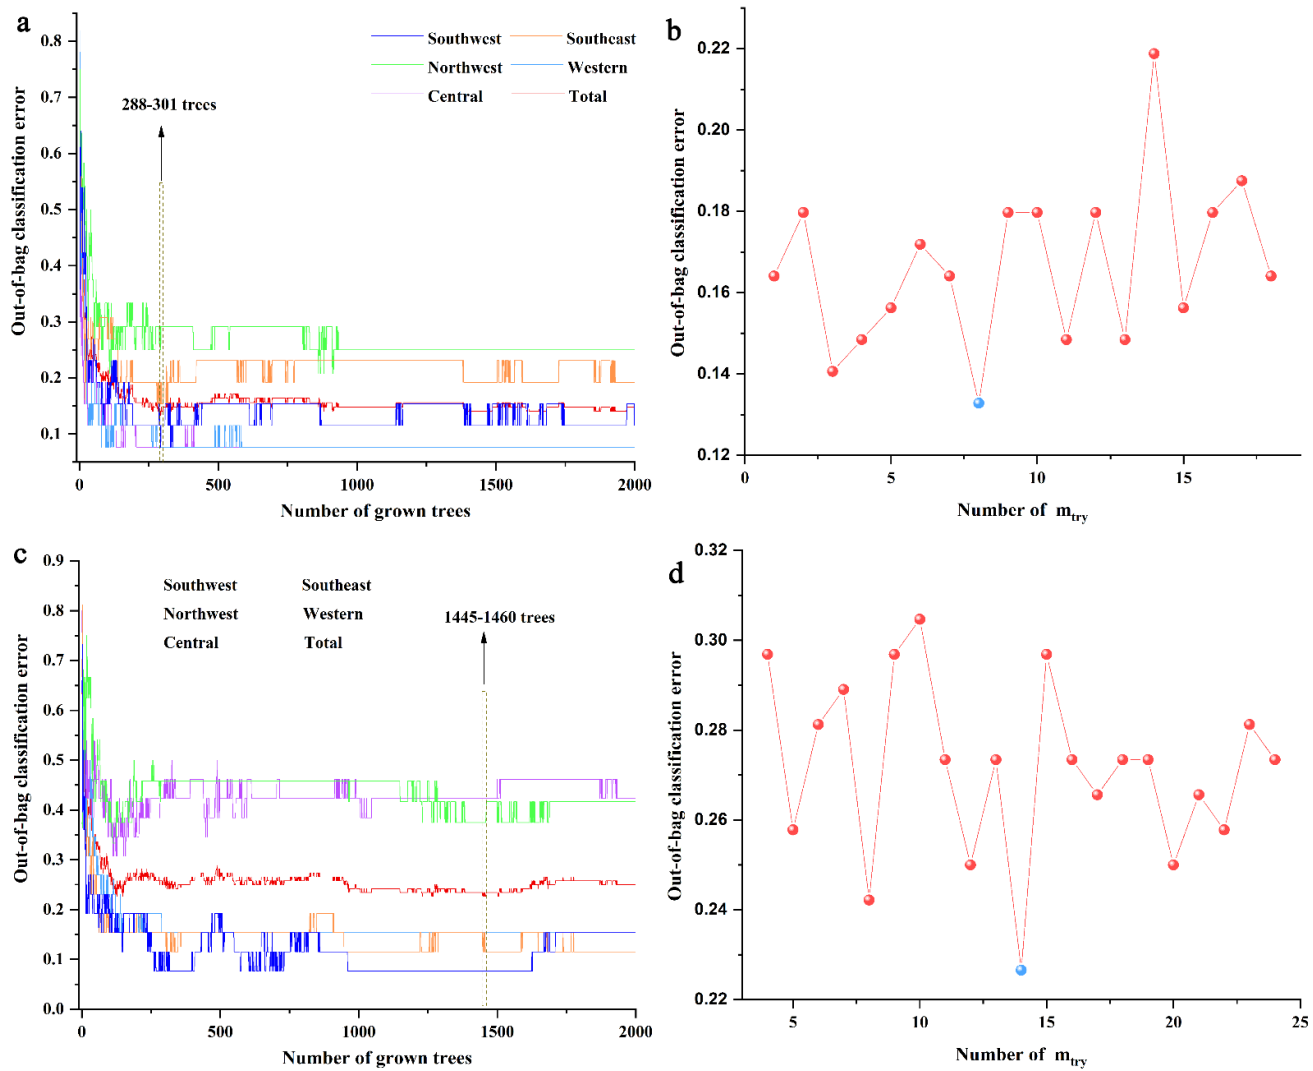

Fig. S5



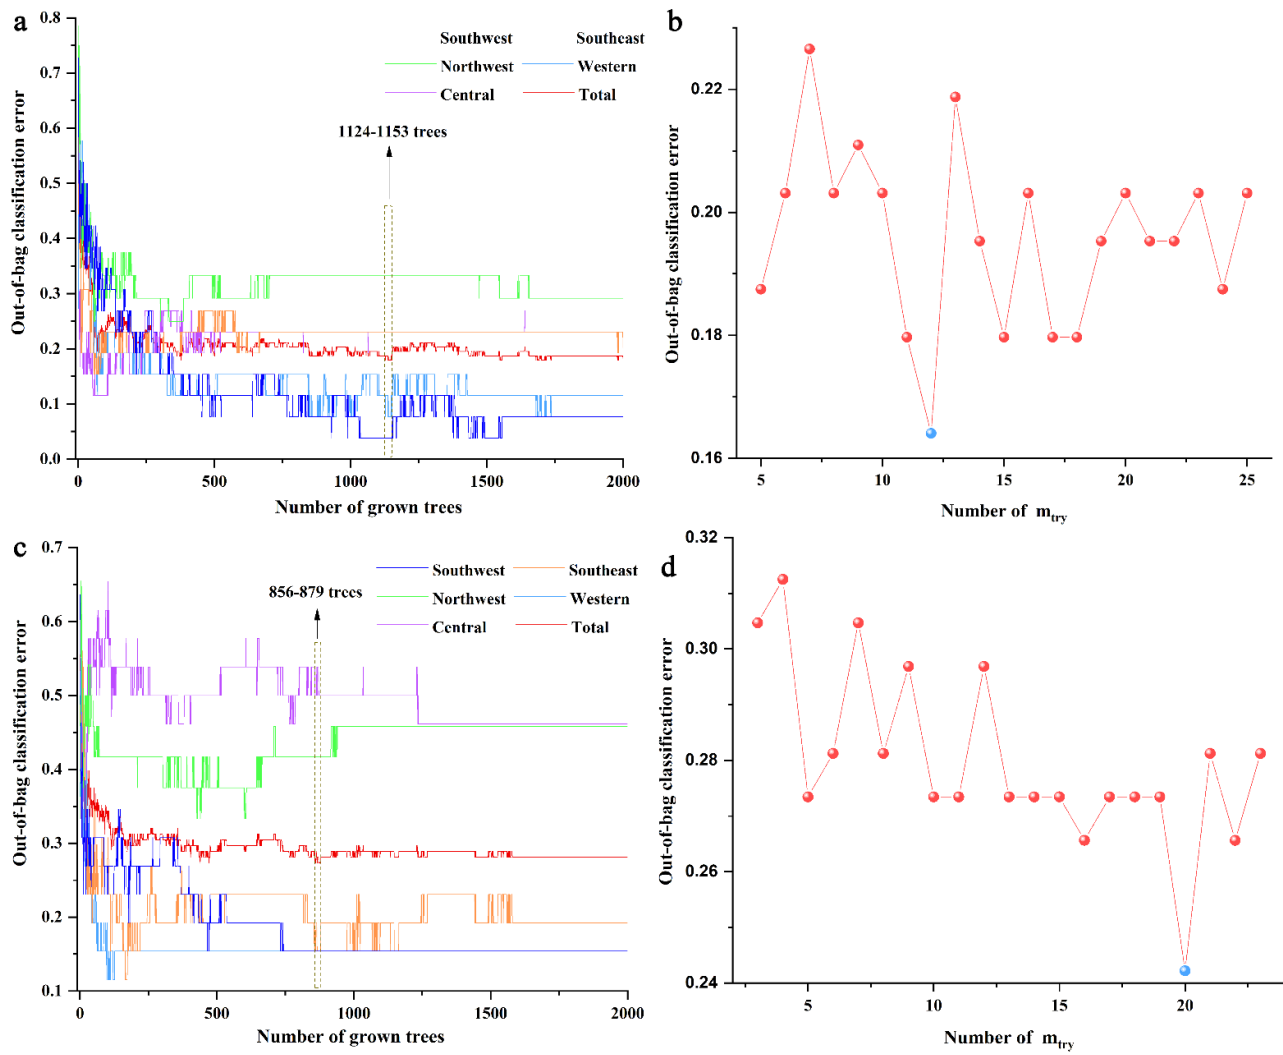

Fig. S6

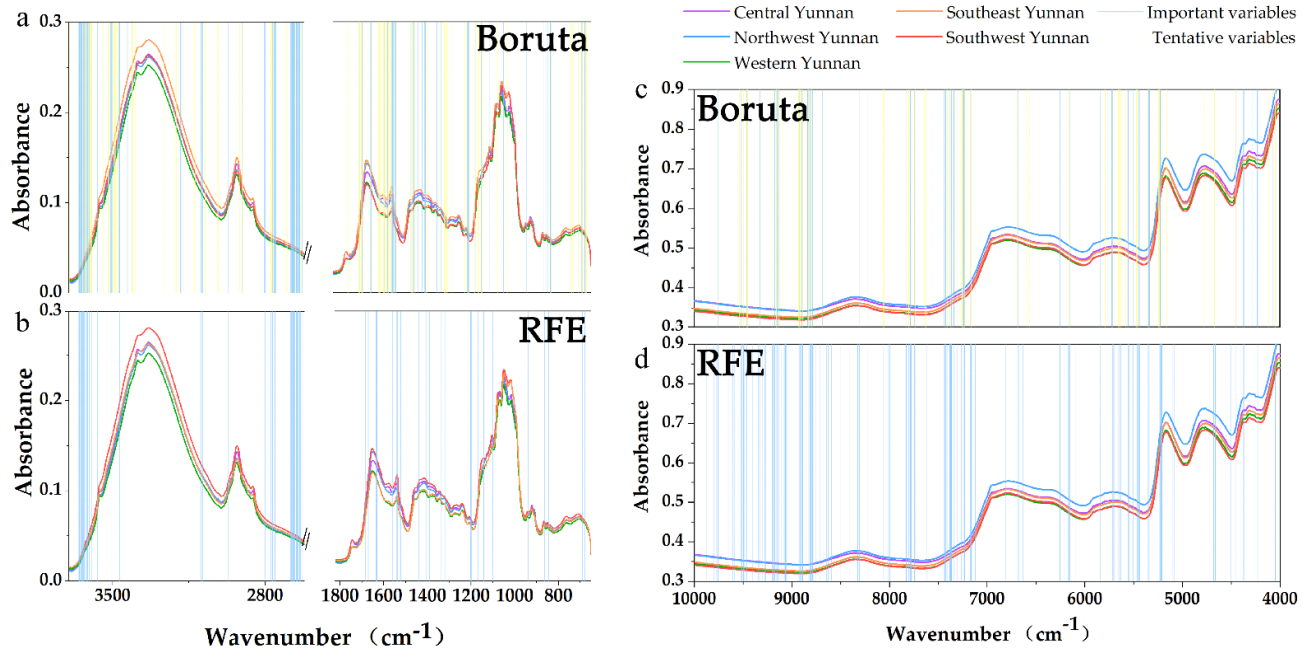

Fig. S7

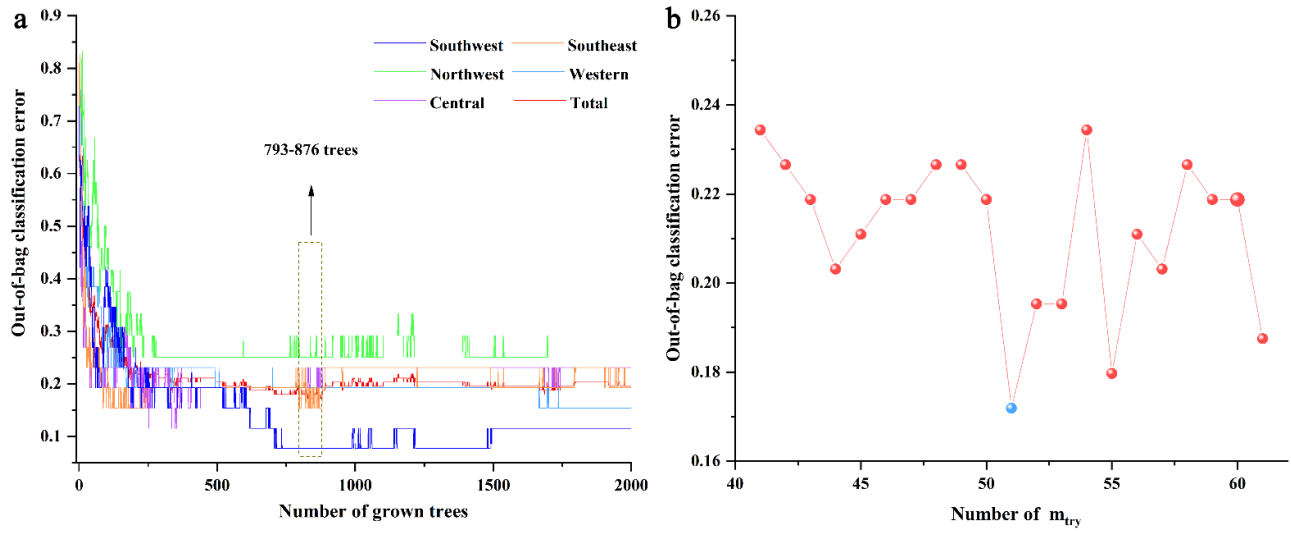

Fig. S8

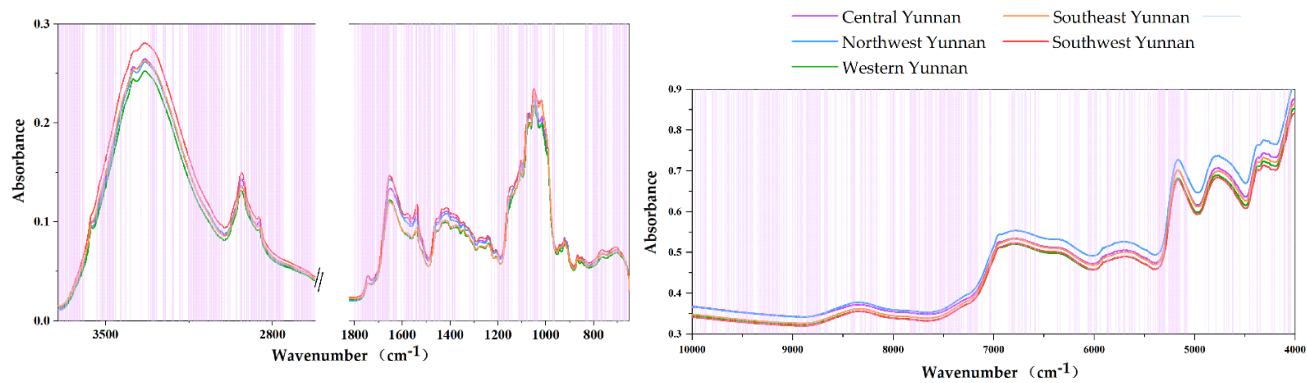

Fig. S9

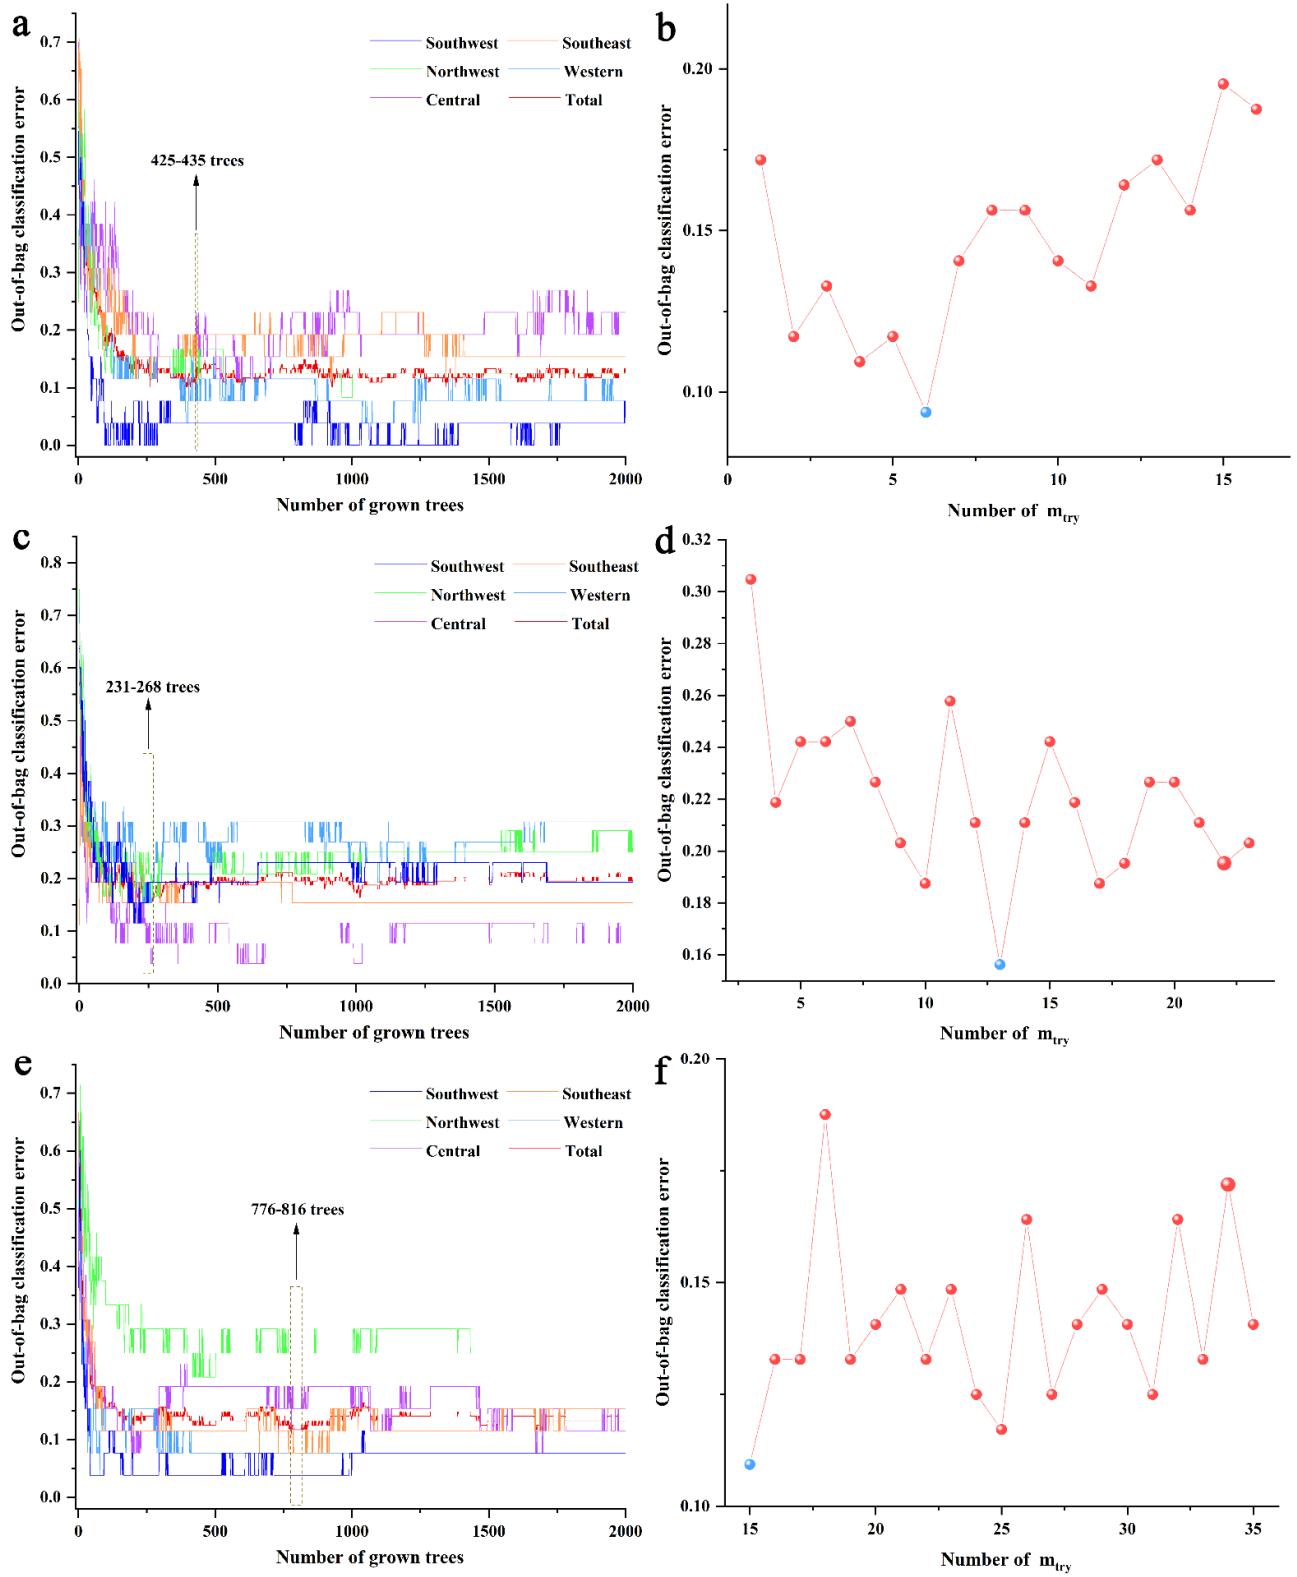

Fig. S10

Table S1

| Data sources | Preprocessing | R <sup>2</sup> | Q <sup>2</sup> | RMSEE           | RMSECV          | Accuracy      |
|--------------|---------------|----------------|----------------|-----------------|-----------------|---------------|
| FT-MIR       | Raw           | 0.051          | 0.0097         | 0.379794        | 0.390348        | 34.38%        |
|              | SNV           | 0.079          | 0.0173         | 0.388073        | 0.396241        | 39.06%        |
|              | FD            | 0.072          | 0.0379         | 0.387724        | 0.391868        | 30.47%        |
|              | <b>SD</b>     | <b>0.747</b>   | <b>0.385</b>   | <b>0.211095</b> | <b>0.332652</b> | <b>97.66%</b> |
|              | SNV-FD        | 0.48           | 0.1691         | 0.301191        | 0.371033        | 78.13%        |
|              | SNV-SD        | 0.522          | 0.28           | 0.284848        | 0.348765        | 85.29%        |
| NIR          | Raw           | 0.037          | 0.0229         | 0.395604        | 0.395266        | 28.13%        |
|              | SNV           | 0.068          | 0.0364         | 0.390668        | 0.392528        | 26.56%        |
|              | FD            | 0.047          | 0.0005         | 0.393084        | 0.399797        | 32.03%        |
|              | <b>SD</b>     | <b>0.879</b>   | <b>0.628</b>   | <b>0.145553</b> | <b>0.257344</b> | <b>100%</b>   |
|              | SNV-FD        | 0.333          | 0.143          | 0.335555        | 0.369848        | 67.19%        |
|              | SNV-SD        | 0.781          | 0.457          | 0.194624        | 0.300091        | 98.44%        |

Table S2

| Sample number | Class label | FT-MIR-PCs tree votes (Calibration set) |          |          |          |          | NIR-PCs tree votes (Calibration set) |          |          |          |          |
|---------------|-------------|-----------------------------------------|----------|----------|----------|----------|--------------------------------------|----------|----------|----------|----------|
|               |             | Class 1                                 | Class 2  | Class 3  | Class 4  | Class 5  | Class 1                              | Class 2  | Class 3  | Class 4  | Class 5  |
| 36            | 1           | 0.302703                                | 0.091892 | 0.259459 | 0.145946 | 0.2      | 0.387597                             | 0.142119 | 0.111111 | 0.111111 | 0.248062 |
| 33            | 1           | 0.380711                                | 0.248731 | 0.177665 | 0.13198  | 0.060914 | 0.444149                             | 0.180851 | 0.130319 | 0.090426 | 0.154255 |
| 12            | 1           | 0.317204                                | 0.107527 | 0.064516 | 0.376344 | 0.134409 | 0.280519                             | 0.155844 | 0.246753 | 0.2      | 0.116883 |
| 1             | 1           | 0.453608                                | 0.231959 | 0.154639 | 0.046392 | 0.113402 | 0.37931                              | 0.212202 | 0.106101 | 0.206897 | 0.095491 |
| 2             | 1           | 0.46114                                 | 0.098446 | 0.139896 | 0.124352 | 0.176166 | 0.180203                             | 0.126904 | 0.076142 | 0.121827 | 0.494924 |
| 20            | 1           | 0.309392                                | 0.143646 | 0.121547 | 0.292818 | 0.132597 | 0.205962                             | 0.262873 | 0.279133 | 0.159892 | 0.092141 |
| 19            | 1           | 0.35122                                 | 0.117073 | 0.131707 | 0.165854 | 0.234146 | 0.325137                             | 0.103825 | 0.142077 | 0.125683 | 0.303279 |
| 27            | 1           | 0.304124                                | 0.175258 | 0.087629 | 0.211134 | 0.221649 | 0.360335                             | 0.117318 | 0.086592 | 0.164804 | 0.27095  |
| 16            | 1           | 0.257732                                | 0.103093 | 0.164948 | 0.159794 | 0.314433 | 0.289125                             | 0.28382  | 0.177719 | 0.148541 | 0.100796 |
| 31            | 1           | 0.136126                                | 0.104712 | 0.209424 | 0.162304 | 0.387435 | 0.227273                             | 0.18984  | 0.352941 | 0.122995 | 0.106952 |
| 3             | 1           | 0.386139                                | 0.227723 | 0.123762 | 0.113861 | 0.148515 | 0.327078                             | 0.112601 | 0.088472 | 0.160858 | 0.310992 |
| 18            | 1           | 0.289216                                | 0.034314 | 0.117647 | 0.323529 | 0.235294 | 0.208226                             | 0.154242 | 0.197943 | 0.303342 | 0.136247 |
| 9             | 1           | 0.412698                                | 0.042328 | 0.15873  | 0.31746  | 0.068783 | 0.37883                              | 0.133705 | 0.181058 | 0.089136 | 0.21727  |
| 26            | 1           | 0.192513                                | 0.085561 | 0.245989 | 0.304813 | 0.171123 | 0.420485                             | 0.142857 | 0.113208 | 0.091644 | 0.231806 |
| 25            | 1           | 0.317073                                | 0.219512 | 0.136585 | 0.209756 | 0.117073 | 0.246269                             | 0.114428 | 0.156716 | 0.134328 | 0.348259 |
| 23            | 1           | 0.282051                                | 0.153846 | 0.148718 | 0.307692 | 0.107692 | 0.323529                             | 0.104278 | 0.101604 | 0.117647 | 0.352941 |
| 38            | 1           | 0.169312                                | 0.148148 | 0.407407 | 0.089947 | 0.185185 | 0.338843                             | 0.118457 | 0.181818 | 0.22865  | 0.132231 |
| 14            | 1           | 0.311224                                | 0.153061 | 0.280612 | 0.112245 | 0.142857 | 0.25641                              | 0.356125 | 0.236467 | 0.099715 | 0.051282 |
| 40            | 1           | 0.238579                                | 0.086294 | 0.111675 | 0.116751 | 0.446701 | 0.287599                             | 0.324538 | 0.137203 | 0.16095  | 0.08971  |
| 5             | 1           | 0.417112                                | 0.13369  | 0.15508  | 0.203209 | 0.090909 | 0.390123                             | 0.069136 | 0.096296 | 0.165432 | 0.279012 |
| 29            | 1           | 0.22335                                 | 0.233503 | 0.192893 | 0.121827 | 0.228426 | 0.306407                             | 0.122563 | 0.122563 | 0.122563 | 0.325905 |
| 39            | 1           | 0.413043                                | 0.092391 | 0.358696 | 0.065217 | 0.070652 | 0.456395                             | 0.110465 | 0.075581 | 0.194767 | 0.162791 |
| 17            | 1           | 0.378378                                | 0.102703 | 0.145946 | 0.156757 | 0.216216 | 0.193211                             | 0.130548 | 0.185379 | 0.362924 | 0.127937 |
| 7             | 1           | 0.487562                                | 0.134328 | 0.064677 | 0.149254 | 0.164179 | 0.433915                             | 0.154613 | 0.114713 | 0.15212  | 0.144638 |
| 21            | 1           | 0.472906                                | 0.137931 | 0.083744 | 0.182266 | 0.123153 | 0.176152                             | 0.298103 | 0.289973 | 0.170732 | 0.065041 |
| 11            | 1           | 0.2723                                  | 0.126761 | 0.267606 | 0.126761 | 0.206573 | 0.344221                             | 0.123116 | 0.153266 | 0.18593  | 0.193467 |
| 62            | 2           | 0.092233                                | 0.543689 | 0.242718 | 0.106796 | 0.014563 | 0.198473                             | 0.335878 | 0.167939 | 0.165394 | 0.132316 |
| 59            | 2           | 0.160194                                | 0.446602 | 0.106796 | 0.218447 | 0.067961 | 0.186813                             | 0.299451 | 0.17033  | 0.252747 | 0.090659 |
| 56            | 2           | 0.045685                                | 0.426396 | 0.208122 | 0.177665 | 0.142132 | 0.177285                             | 0.33795  | 0.144044 | 0.254848 | 0.085873 |
| 72            | 2           | 0.07767                                 | 0.509709 | 0.063107 | 0.184466 | 0.165049 | 0.293963                             | 0.351706 | 0.11811  | 0.186352 | 0.049869 |
| 44            | 2           | 0.084577                                | 0.512438 | 0.104478 | 0.079602 | 0.218905 | 0.148615                             | 0.428212 | 0.146096 | 0.123426 | 0.153652 |
| 45            | 2           | 0.063415                                | 0.541463 | 0.068293 | 0.146341 | 0.180488 | 0.174731                             | 0.446237 | 0.158602 | 0.110215 | 0.110215 |
| 63            | 2           | 0.378238                                | 0.15544  | 0.202073 | 0.19171  | 0.072539 | 0.150127                             | 0.279898 | 0.201018 | 0.21374  | 0.155216 |
| 41            | 2           | 0.243094                                | 0.165746 | 0.149171 | 0.276243 | 0.165746 | 0.09949                              | 0.387755 | 0.145408 | 0.260204 | 0.107143 |
| 51            | 2           | 0.162921                                | 0.275281 | 0.252809 | 0.162921 | 0.146067 | 0.143603                             | 0.438642 | 0.13577  | 0.151436 | 0.130548 |
| 79            | 2           | 0.185567                                | 0.469072 | 0.113402 | 0.128866 | 0.103093 | 0.149584                             | 0.296399 | 0.213296 | 0.238227 | 0.102493 |
| 48            | 2           | 0.122066                                | 0.43662  | 0.201878 | 0.131455 | 0.107981 | 0.160428                             | 0.409091 | 0.136364 | 0.203209 | 0.090909 |
| 76            | 2           | 0.230366                                | 0.308901 | 0.225131 | 0.167539 | 0.068063 | 0.123324                             | 0.348525 | 0.230563 | 0.179625 | 0.117962 |
| 68            | 2           | 0.071795                                | 0.738462 | 0.041026 | 0.051282 | 0.097436 | 0.099738                             | 0.430446 | 0.110236 | 0.267717 | 0.091864 |
| 55            | 2           | 0.06278                                 | 0.591928 | 0.147982 | 0.134529 | 0.06278  | 0.174033                             | 0.364641 | 0.162983 | 0.135359 | 0.162983 |
| 61            | 2           | 0.122905                                | 0.145251 | 0.167598 | 0.312849 | 0.251397 | 0.155172                             | 0.428161 | 0.123563 | 0.175287 | 0.117816 |
| 74            | 2           | 0.072917                                | 0.619792 | 0.083333 | 0.083333 | 0.140625 | 0.13577                              | 0.475196 | 0.093995 | 0.177546 | 0.117493 |
| 70            | 2           | 0.152542                                | 0.316384 | 0.124294 | 0.242938 | 0.163842 | 0.386301                             | 0.317808 | 0.090411 | 0.167123 | 0.038356 |
| 54            | 2           | 0.048913                                | 0.581522 | 0.065217 | 0.168478 | 0.13587  | 0.389205                             | 0.210227 | 0.15625  | 0.153409 | 0.090909 |
| 66            | 2           | 0.115183                                | 0.329843 | 0.099476 | 0.198953 | 0.256545 | 0.14578                              | 0.350384 | 0.15601  | 0.225064 | 0.122762 |
| 64            | 2           | 0.181347                                | 0.264249 | 0.170984 | 0.227979 | 0.15544  | 0.131783                             | 0.315245 | 0.198966 | 0.22739  | 0.126615 |

---

|     |   |          |          |          |          |          |          |          |          |          |          |
|-----|---|----------|----------|----------|----------|----------|----------|----------|----------|----------|----------|
| 57  | 2 | 0.260204 | 0.352041 | 0.117347 | 0.091837 | 0.178571 | 0.109453 | 0.400498 | 0.273632 | 0.077114 | 0.139303 |
| 75  | 2 | 0.113402 | 0.386598 | 0.072165 | 0.092784 | 0.335052 | 0.227778 | 0.427778 | 0.088889 | 0.169444 | 0.086111 |
| 47  | 2 | 0.215311 | 0.334928 | 0.253589 | 0.057416 | 0.138756 | 0.219144 | 0.43073  | 0.115869 | 0.173804 | 0.060453 |
| 77  | 2 | 0.073298 | 0.413613 | 0.230366 | 0.13089  | 0.151832 | 0.119792 | 0.463542 | 0.135417 | 0.111979 | 0.169271 |
| 53  | 2 | 0.258537 | 0.35122  | 0.102439 | 0.107317 | 0.180488 | 0.103093 | 0.556701 | 0.085052 | 0.154639 | 0.100515 |
| 50  | 2 | 0.041026 | 0.45641  | 0.235897 | 0.14359  | 0.123077 | 0.208451 | 0.256338 | 0.242254 | 0.149296 | 0.143662 |
| 101 | 3 | 0.167513 | 0.172589 | 0.248731 | 0.208122 | 0.203046 | 0.164179 | 0.256219 | 0.208955 | 0.251244 | 0.119403 |
| 91  | 3 | 0.103093 | 0.159794 | 0.618557 | 0.07732  | 0.041237 | 0.123656 | 0.091398 | 0.537634 | 0.145161 | 0.102151 |
| 90  | 3 | 0.213592 | 0.184466 | 0.165049 | 0.271845 | 0.165049 | 0.179949 | 0.159383 | 0.365039 | 0.195373 | 0.100257 |
| 87  | 3 | 0.309524 | 0.195238 | 0.166667 | 0.180952 | 0.147619 | 0.098191 | 0.20155  | 0.281654 | 0.235142 | 0.183463 |
| 99  | 3 | 0.107317 | 0.102439 | 0.253659 | 0.141463 | 0.395122 | 0.252604 | 0.377604 | 0.135417 | 0.158854 | 0.075521 |
| 114 | 3 | 0.216931 | 0.354497 | 0.121693 | 0.185185 | 0.121693 | 0.085052 | 0.180412 | 0.407216 | 0.257732 | 0.069588 |
| 116 | 3 | 0.340782 | 0.139665 | 0.24581  | 0.145251 | 0.128492 | 0.183099 | 0.149296 | 0.140845 | 0.309859 | 0.216901 |
| 102 | 3 | 0.149733 | 0.058824 | 0.315508 | 0.240642 | 0.235294 | 0.19571  | 0.179625 | 0.313673 | 0.152815 | 0.158177 |
| 104 | 3 | 0.183099 | 0.164319 | 0.43662  | 0.131455 | 0.084507 | 0.177378 | 0.102828 | 0.583548 | 0.051414 | 0.084833 |
| 83  | 3 | 0.149321 | 0.235294 | 0.334842 | 0.095023 | 0.18552  | 0.220513 | 0.269231 | 0.274359 | 0.107692 | 0.128205 |
| 110 | 3 | 0.145078 | 0.11399  | 0.393782 | 0.145078 | 0.202073 | 0.191176 | 0.188725 | 0.397059 | 0.107843 | 0.115196 |
| 108 | 3 | 0.368687 | 0.065657 | 0.30303  | 0.060606 | 0.20202  | 0.182292 | 0.119792 | 0.476563 | 0.117188 | 0.104167 |
| 81  | 3 | 0.227053 | 0.072464 | 0.396135 | 0.207729 | 0.096618 | 0.282667 | 0.122667 | 0.261333 | 0.232    | 0.101333 |
| 107 | 3 | 0.073298 | 0.172775 | 0.078534 | 0.141361 | 0.534031 | 0.164804 | 0.150838 | 0.458101 | 0.164804 | 0.061453 |
| 112 | 3 | 0.280788 | 0.093596 | 0.384236 | 0.108374 | 0.133005 | 0.210667 | 0.149333 | 0.341333 | 0.181333 | 0.117333 |
| 113 | 3 | 0.151832 | 0.057592 | 0.664921 | 0.052356 | 0.073298 | 0.222222 | 0.143631 | 0.233062 | 0.181572 | 0.219512 |
| 97  | 3 | 0.204545 | 0.125    | 0.409091 | 0.159091 | 0.102273 | 0.305851 | 0.167553 | 0.316489 | 0.119681 | 0.090426 |
| 85  | 3 | 0.102041 | 0.071429 | 0.27551  | 0.346939 | 0.204082 | 0.19685  | 0.183727 | 0.496063 | 0.081365 | 0.041995 |
| 109 | 3 | 0.079787 | 0.244681 | 0.37234  | 0.175532 | 0.12766  | 0.193211 | 0.276762 | 0.318538 | 0.091384 | 0.120104 |
| 105 | 3 | 0.033493 | 0.105263 | 0.287081 | 0.162679 | 0.411483 | 0.104439 | 0.29765  | 0.375979 | 0.122715 | 0.099217 |
| 100 | 3 | 0.315789 | 0.105263 | 0.357895 | 0.126316 | 0.094737 | 0.172237 | 0.136247 | 0.375321 | 0.251928 | 0.064267 |
| 111 | 3 | 0.177419 | 0.069892 | 0.639785 | 0.069892 | 0.043011 | 0.253298 | 0.081794 | 0.242744 | 0.07124  | 0.350923 |
| 96  | 3 | 0.067708 | 0.072917 | 0.270833 | 0.380208 | 0.208333 | 0.114441 | 0.122616 | 0.378747 | 0.245232 | 0.138965 |
| 106 | 3 | 0.17     | 0.125    | 0.535    | 0.115    | 0.055    | 0.102828 | 0.105398 | 0.48329  | 0.125964 | 0.182519 |
| 152 | 4 | 0.219626 | 0.088785 | 0.392523 | 0.21028  | 0.088785 | 0.197333 | 0.357333 | 0.208    | 0.157333 | 0.08     |
| 121 | 4 | 0.245989 | 0.240642 | 0.085561 | 0.294118 | 0.13369  | 0.188366 | 0.166205 | 0.144044 | 0.432133 | 0.069252 |
| 125 | 4 | 0.116751 | 0.13198  | 0.126904 | 0.395939 | 0.228426 | 0.132468 | 0.21039  | 0.150649 | 0.428571 | 0.077922 |
| 128 | 4 | 0.134503 | 0.181287 | 0.076023 | 0.374269 | 0.233918 | 0.242021 | 0.12766  | 0.138298 | 0.223404 | 0.268617 |
| 145 | 4 | 0.091429 | 0.142857 | 0.068571 | 0.674286 | 0.022857 | 0.143959 | 0.195373 | 0.164524 | 0.401028 | 0.095116 |
| 156 | 4 | 0.233918 | 0.064327 | 0.315789 | 0.327485 | 0.05848  | 0.170732 | 0.271003 | 0.127371 | 0.276423 | 0.154472 |
| 126 | 4 | 0.149485 | 0.139175 | 0.149485 | 0.510309 | 0.051546 | 0.102493 | 0.155125 | 0.171745 | 0.373961 | 0.196676 |
| 131 | 4 | 0.156627 | 0.216867 | 0.066265 | 0.5      | 0.060241 | 0.316547 | 0.11271  | 0.134293 | 0.297362 | 0.139089 |
| 117 | 4 | 0.229592 | 0.214286 | 0.112245 | 0.239796 | 0.204082 | 0.126649 | 0.065963 | 0.184697 | 0.522427 | 0.100264 |
| 122 | 4 | 0.220994 | 0.082873 | 0.143646 | 0.20442  | 0.348066 | 0.29199  | 0.093023 | 0.077519 | 0.315245 | 0.222222 |
| 149 | 4 | 0.216749 | 0.147783 | 0.226601 | 0.275862 | 0.133005 | 0.176923 | 0.151282 | 0.169231 | 0.402564 | 0.1      |
| 153 | 4 | 0.111111 | 0.144928 | 0.072464 | 0.299517 | 0.371981 | 0.140212 | 0.097884 | 0.10582  | 0.526455 | 0.12963  |
| 146 | 4 | 0.306011 | 0.092896 | 0.136612 | 0.360656 | 0.103825 | 0.172414 | 0.114058 | 0.167109 | 0.427056 | 0.119363 |
| 123 | 4 | 0.084906 | 0.103774 | 0.042453 | 0.726415 | 0.042453 | 0.138272 | 0.234568 | 0.160494 | 0.367901 | 0.098765 |
| 139 | 4 | 0.098039 | 0.127451 | 0.029412 | 0.686275 | 0.058824 | 0.2675   | 0.1775   | 0.0875   | 0.2825   | 0.185    |
| 140 | 4 | 0.165    | 0.075    | 0.155    | 0.465    | 0.14     | 0.150754 | 0.125628 | 0.135678 | 0.505025 | 0.082915 |
| 137 | 4 | 0.110553 | 0.175879 | 0.341709 | 0.160804 | 0.211055 | 0.193029 | 0.227882 | 0.209115 | 0.19571  | 0.174263 |
| 144 | 4 | 0.218579 | 0.125683 | 0.131148 | 0.251366 | 0.273224 | 0.18799  | 0.214099 | 0.18799  | 0.331593 | 0.078329 |
| 130 | 4 | 0.043689 | 0.208738 | 0.053398 | 0.679612 | 0.014563 | 0.245946 | 0.178378 | 0.113514 | 0.272973 | 0.189189 |

---



---

|     |   |          |          |          |          |          |          |          |          |          |          |
|-----|---|----------|----------|----------|----------|----------|----------|----------|----------|----------|----------|
| 118 | 4 | 0.068421 | 0.363158 | 0.184211 | 0.126316 | 0.257895 | 0.210227 | 0.102273 | 0.079545 | 0.420455 | 0.1875   |
| 148 | 4 | 0.346535 | 0.10396  | 0.123762 | 0.29703  | 0.128713 | 0.212598 | 0.16273  | 0.186352 | 0.283465 | 0.154856 |
| 134 | 4 | 0.053922 | 0.137255 | 0.191176 | 0.573529 | 0.044118 | 0.108861 | 0.182278 | 0.174684 | 0.425316 | 0.108861 |
| 141 | 4 | 0.095745 | 0.180851 | 0.101064 | 0.340426 | 0.281915 | 0.079897 | 0.10567  | 0.141753 | 0.556701 | 0.115979 |
| 136 | 4 | 0.126168 | 0.140187 | 0.121495 | 0.551402 | 0.060748 | 0.08094  | 0.127937 | 0.234987 | 0.472585 | 0.083551 |
| 154 | 4 | 0.076142 | 0.035533 | 0.401015 | 0.208122 | 0.279188 | 0.259804 | 0.176471 | 0.166667 | 0.32598  | 0.071078 |
| 129 | 4 | 0.321053 | 0.094737 | 0.152632 | 0.242105 | 0.189474 | 0.245399 | 0.300613 | 0.113497 | 0.260736 | 0.079755 |
| 192 | 5 | 0.242424 | 0.161616 | 0.141414 | 0.151515 | 0.30303  | 0.194373 | 0.038363 | 0.086957 | 0.076726 | 0.603581 |
| 171 | 5 | 0.192708 | 0.192708 | 0.104167 | 0.25     | 0.260417 | 0.171662 | 0.174387 | 0.103542 | 0.13624  | 0.414169 |
| 169 | 5 | 0.253886 | 0.253886 | 0.129534 | 0.134715 | 0.227979 | 0.124309 | 0.154696 | 0.19337  | 0.323204 | 0.20442  |
| 162 | 5 | 0.284153 | 0.163934 | 0.15847  | 0.103825 | 0.289617 | 0.192    | 0.165333 | 0.189333 | 0.074667 | 0.378667 |
| 182 | 5 | 0.231959 | 0.195876 | 0.072165 | 0.113402 | 0.386598 | 0.262087 | 0.07888  | 0.076336 | 0.117048 | 0.465649 |
| 190 | 5 | 0.15625  | 0.130208 | 0.140625 | 0.328125 | 0.244792 | 0.229008 | 0.139949 | 0.155216 | 0.068702 | 0.407125 |
| 167 | 5 | 0.234637 | 0.078212 | 0.413408 | 0.106145 | 0.167598 | 0.32337  | 0.141304 | 0.127717 | 0.084239 | 0.32337  |
| 178 | 5 | 0.254808 | 0.033654 | 0.350962 | 0.100962 | 0.259615 | 0.213158 | 0.123684 | 0.073684 | 0.155263 | 0.434211 |
| 196 | 5 | 0.161458 | 0.166667 | 0.088542 | 0.15625  | 0.427083 | 0.251337 | 0.157754 | 0.109626 | 0.093583 | 0.387701 |
| 165 | 5 | 0.162437 | 0.055838 | 0.258883 | 0.253807 | 0.269036 | 0.283019 | 0.072776 | 0.156334 | 0.102426 | 0.385445 |
| 187 | 5 | 0.171429 | 0.22381  | 0.304762 | 0.07619  | 0.22381  | 0.137566 | 0.164021 | 0.121693 | 0.156085 | 0.420635 |
| 191 | 5 | 0.071429 | 0.132653 | 0.367347 | 0.188776 | 0.239796 | 0.161369 | 0.158924 | 0.070905 | 0.122249 | 0.486553 |
| 184 | 5 | 0.143646 | 0.116022 | 0.226519 | 0.276243 | 0.237569 | 0.160428 | 0.136364 | 0.149733 | 0.09893  | 0.454545 |
| 161 | 5 | 0.070707 | 0.30303  | 0.207071 | 0.222222 | 0.19697  | 0.12931  | 0.043103 | 0.123563 | 0.097701 | 0.606322 |
| 180 | 5 | 0.266667 | 0.097436 | 0.092308 | 0.097436 | 0.446154 | 0.2375   | 0.1875   | 0.1475   | 0.115    | 0.3125   |
| 175 | 5 | 0.072917 | 0.244792 | 0.1875   | 0.239583 | 0.255208 | 0.265823 | 0.108861 | 0.116456 | 0.063291 | 0.44557  |
| 179 | 5 | 0.258216 | 0.140845 | 0.187793 | 0.13615  | 0.276995 | 0.179551 | 0.104738 | 0.087282 | 0.229426 | 0.399002 |
| 168 | 5 | 0.252475 | 0.118812 | 0.044554 | 0.118812 | 0.465347 | 0.135359 | 0.093923 | 0.104972 | 0.129834 | 0.535912 |
| 189 | 5 | 0.170854 | 0.155779 | 0.160804 | 0.090452 | 0.422111 | 0.241935 | 0.083333 | 0.051075 | 0.27957  | 0.344086 |
| 173 | 5 | 0.178571 | 0.163265 | 0.122449 | 0.183673 | 0.352041 | 0.181333 | 0.058667 | 0.117333 | 0.12     | 0.522667 |
| 194 | 5 | 0.156566 | 0.106061 | 0.287879 | 0.252525 | 0.19697  | 0.198413 | 0.089947 | 0.108466 | 0.190476 | 0.412698 |
| 195 | 5 | 0.133333 | 0.138889 | 0.1      | 0.111111 | 0.516667 | 0.168449 | 0.131016 | 0.069519 | 0.176471 | 0.454545 |
| 170 | 5 | 0.09     | 0.07     | 0.035    | 0.135    | 0.67     | 0.154255 | 0.087766 | 0.125    | 0.146277 | 0.486702 |
| 174 | 5 | 0.112745 | 0.112745 | 0.107843 | 0.127451 | 0.539216 | 0.12782  | 0.072682 | 0.110276 | 0.157895 | 0.531328 |
| 163 | 5 | 0.190955 | 0.125628 | 0.090452 | 0.251256 | 0.341709 | 0.267857 | 0.066327 | 0.15051  | 0.089286 | 0.42602  |
| 181 | 5 | 0.161137 | 0.090047 | 0.21327  | 0.123223 | 0.412322 | 0.076923 | 0.07967  | 0.085165 | 0.068681 | 0.68956  |

---

Table S3

| Sample number | Class label | FT-MIR-PCs tree votes (Validation set) |          |          |          |          | NIR-PCs tree votes (Validation set) |          |          |          |          |
|---------------|-------------|----------------------------------------|----------|----------|----------|----------|-------------------------------------|----------|----------|----------|----------|
|               |             | Class 1                                | Class 2  | Class 3  | Class 4  | Class 5  | Class 1                             | Class 2  | Class 3  | Class 4  | Class 5  |
| 4             | 1           | 0.500935                               | 0.104673 | 0.069159 | 0.263551 | 0.061682 | 0.33301                             | 0.072816 | 0.140777 | 0.108738 | 0.34466  |
| 6             | 1           | 0.246729                               | 0.149533 | 0.084112 | 0.321495 | 0.198131 | 0.360194                            | 0.183495 | 0.132039 | 0.280583 | 0.043689 |
| 8             | 1           | 0.568224                               | 0.063551 | 0.061682 | 0.171963 | 0.134579 | 0.368932                            | 0.112621 | 0.147573 | 0.231068 | 0.139806 |
| 10            | 1           | 0.379439                               | 0.11028  | 0.170093 | 0.233645 | 0.106542 | 0.380583                            | 0.058252 | 0.174757 | 0.145631 | 0.240777 |
| 13            | 1           | 0.435514                               | 0.069159 | 0.093458 | 0.26729  | 0.134579 | 0.405825                            | 0.085437 | 0.128155 | 0.131068 | 0.249515 |
| 15            | 1           | 0.345794                               | 0.115888 | 0.114019 | 0.269159 | 0.15514  | 0.415534                            | 0.164078 | 0.23301  | 0.135922 | 0.051456 |
| 22            | 1           | 0.28785                                | 0.11028  | 0.13271  | 0.254206 | 0.214953 | 0.570874                            | 0.096117 | 0.11068  | 0.070874 | 0.151456 |
| 24            | 1           | 0.271028                               | 0.057944 | 0.239252 | 0.256075 | 0.175701 | 0.541748                            | 0.136893 | 0.092233 | 0.078641 | 0.150485 |
| 28            | 1           | 0.327103                               | 0.080374 | 0.171963 | 0.149533 | 0.271028 | 0.531068                            | 0.078641 | 0.136893 | 0.07767  | 0.175728 |
| 30            | 1           | 0.717757                               | 0.059813 | 0.093458 | 0.072897 | 0.056075 | 0.526214                            | 0.07767  | 0.14466  | 0.085437 | 0.166019 |
| 32            | 1           | 0.616822                               | 0.11215  | 0.143925 | 0.063551 | 0.063551 | 0.530097                            | 0.084466 | 0.096117 | 0.080583 | 0.208738 |
| 34            | 1           | 0.375701                               | 0.082243 | 0.149533 | 0.08785  | 0.304673 | 0.562136                            | 0.070874 | 0.15534  | 0.084466 | 0.127184 |
| 35            | 1           | 0.327103                               | 0.065421 | 0.31028  | 0.095327 | 0.201869 | 0.473786                            | 0.162136 | 0.04466  | 0.100971 | 0.218447 |
| 37            | 1           | 0.413084                               | 0.099065 | 0.192523 | 0.123364 | 0.171963 | 0.561165                            | 0.070874 | 0.065049 | 0.136893 | 0.166019 |
| 42            | 2           | 0.11215                                | 0.383178 | 0.168224 | 0.140187 | 0.196262 | 0.364078                            | 0.274757 | 0.109709 | 0.176699 | 0.074757 |
| 43            | 2           | 0.071028                               | 0.566355 | 0.082243 | 0.160748 | 0.119626 | 0.192233                            | 0.307767 | 0.105825 | 0.292233 | 0.101942 |
| 46            | 2           | 0.095327                               | 0.471028 | 0.063551 | 0.157009 | 0.213084 | 0.149515                            | 0.427184 | 0.081553 | 0.22233  | 0.119417 |
| 49            | 2           | 0.078505                               | 0.633645 | 0.158879 | 0.039252 | 0.08972  | 0.166019                            | 0.563107 | 0.090291 | 0.126214 | 0.054369 |
| 52            | 2           | 0.074766                               | 0.652336 | 0.093458 | 0.046729 | 0.13271  | 0.151456                            | 0.399029 | 0.114563 | 0.262136 | 0.072816 |
| 58            | 2           | 0.085981                               | 0.661682 | 0.085981 | 0.052336 | 0.114019 | 0.218447                            | 0.34466  | 0.170874 | 0.138835 | 0.127184 |
| 60            | 2           | 0.237383                               | 0.347664 | 0.072897 | 0.166355 | 0.175701 | 0.214563                            | 0.480583 | 0.078641 | 0.147573 | 0.078641 |
| 65            | 2           | 0.168224                               | 0.500935 | 0.100935 | 0.08972  | 0.140187 | 0.152427                            | 0.480583 | 0.076699 | 0.156311 | 0.133981 |
| 67            | 2           | 0.061682                               | 0.669159 | 0.076636 | 0.085981 | 0.106542 | 0.137864                            | 0.449515 | 0.115534 | 0.239806 | 0.057282 |
| 69            | 2           | 0.162617                               | 0.585047 | 0.104673 | 0.080374 | 0.06729  | 0.134951                            | 0.538835 | 0.150485 | 0.100971 | 0.074757 |
| 71            | 2           | 0.143925                               | 0.405607 | 0.299065 | 0.076636 | 0.074766 | 0.133981                            | 0.535922 | 0.07767  | 0.170874 | 0.081553 |
| 73            | 2           | 0.100935                               | 0.504673 | 0.100935 | 0.091589 | 0.201869 | 0.186408                            | 0.431068 | 0.190291 | 0.109709 | 0.082524 |
| 78            | 2           | 0.11028                                | 0.575701 | 0.056075 | 0.106542 | 0.151402 | 0.131068                            | 0.523301 | 0.158252 | 0.114563 | 0.072816 |
| 80            | 2           | 0.198131                               | 0.297196 | 0.061682 | 0.203738 | 0.239252 | 0.164078                            | 0.349515 | 0.160194 | 0.108738 | 0.217476 |
| 82            | 3           | 0.082243                               | 0.048598 | 0.809346 | 0.024299 | 0.035514 | 0.260194                            | 0.174757 | 0.308738 | 0.146602 | 0.109709 |
| 84            | 3           | 0.084112                               | 0.059813 | 0.672897 | 0.11215  | 0.071028 | 0.076699                            | 0.129126 | 0.56699  | 0.158252 | 0.068932 |
| 86            | 3           | 0.100935                               | 0.041121 | 0.723364 | 0.084112 | 0.050467 | 0.112621                            | 0.153398 | 0.42233  | 0.21068  | 0.100971 |
| 88            | 3           | 0.039252                               | 0.069159 | 0.55514  | 0.076636 | 0.259813 | 0.141748                            | 0.136893 | 0.51068  | 0.097087 | 0.113592 |
| 89            | 3           | 0.04486                                | 0.158879 | 0.368224 | 0.181308 | 0.246729 | 0.101942                            | 0.087379 | 0.582524 | 0.118447 | 0.109709 |
| 92            | 3           | 0.076636                               | 0.095327 | 0.706542 | 0.078505 | 0.042991 | 0.204854                            | 0.146602 | 0.365049 | 0.167961 | 0.115534 |
| 93            | 3           | 0.108411                               | 0.084112 | 0.568224 | 0.166355 | 0.072897 | 0.113592                            | 0.102913 | 0.530097 | 0.115534 | 0.137864 |
| 94            | 3           | 0.097196                               | 0.059813 | 0.64486  | 0.121495 | 0.076636 | 0.203883                            | 0.17767  | 0.254369 | 0.130097 | 0.233981 |
| 95            | 3           | 0.143925                               | 0.143925 | 0.581308 | 0.082243 | 0.048598 | 0.11068                             | 0.132039 | 0.528155 | 0.092233 | 0.136893 |
| 98            | 3           | 0.170093                               | 0.190654 | 0.269159 | 0.224299 | 0.145794 | 0.195146                            | 0.114563 | 0.465049 | 0.084466 | 0.140777 |
| 103           | 3           | 0.085981                               | 0.04486  | 0.536449 | 0.196262 | 0.136449 | 0.159223                            | 0.092233 | 0.423301 | 0.2      | 0.125243 |
| 115           | 3           | 0.097196                               | 0.181308 | 0.414953 | 0.183178 | 0.123364 | 0.097087                            | 0.147573 | 0.472816 | 0.18835  | 0.094175 |
| 119           | 4           | 0.074766                               | 0.106542 | 0.082243 | 0.71028  | 0.026168 | 0.121359                            | 0.13301  | 0.133981 | 0.42233  | 0.18932  |
| 120           | 4           | 0.056075                               | 0.170093 | 0.063551 | 0.657944 | 0.052336 | 0.158252                            | 0.092233 | 0.131068 | 0.478641 | 0.139806 |
| 124           | 4           | 0.114019                               | 0.170093 | 0.082243 | 0.588785 | 0.04486  | 0.207767                            | 0.082524 | 0.151456 | 0.492233 | 0.066019 |
| 127           | 4           | 0.033645                               | 0.128972 | 0.031776 | 0.757009 | 0.048598 | 0.134951                            | 0.159223 | 0.232039 | 0.378641 | 0.095146 |
| 132           | 4           | 0.04486                                | 0.162617 | 0.048598 | 0.663551 | 0.080374 | 0.267961                            | 0.148544 | 0.118447 | 0.374757 | 0.090291 |
| 133           | 4           | 0.085981                               | 0.127103 | 0.042991 | 0.680374 | 0.063551 | 0.100971                            | 0.196117 | 0.094175 | 0.558252 | 0.050485 |

---

|     |   |          |          |          |          |          |          |          |          |          |          |
|-----|---|----------|----------|----------|----------|----------|----------|----------|----------|----------|----------|
| 135 | 4 | 0.06729  | 0.213084 | 0.085981 | 0.257944 | 0.375701 | 0.151456 | 0.126214 | 0.112621 | 0.51068  | 0.099029 |
| 138 | 4 | 0.13271  | 0.115888 | 0.104673 | 0.508411 | 0.138318 | 0.179612 | 0.21068  | 0.179612 | 0.373786 | 0.056311 |
| 142 | 4 | 0.076636 | 0.071028 | 0.186916 | 0.53271  | 0.13271  | 0.108738 | 0.284466 | 0.106796 | 0.41165  | 0.08835  |
| 143 | 4 | 0.059813 | 0.026168 | 0.28785  | 0.549533 | 0.076636 | 0.198058 | 0.18835  | 0.190291 | 0.31165  | 0.11165  |
| 147 | 4 | 0.186916 | 0.093458 | 0.054206 | 0.482243 | 0.183178 | 0.161165 | 0.139806 | 0.12233  | 0.423301 | 0.153398 |
| 150 | 4 | 0.209346 | 0.06729  | 0.128972 | 0.394393 | 0.2      | 0.190291 | 0.12233  | 0.107767 | 0.497087 | 0.082524 |
| 151 | 4 | 0.142056 | 0.108411 | 0.091589 | 0.558879 | 0.099065 | 0.193204 | 0.139806 | 0.095146 | 0.421359 | 0.150485 |
| 155 | 4 | 0.078505 | 0.054206 | 0.549533 | 0.241121 | 0.076636 | 0.190291 | 0.220388 | 0.074757 | 0.363107 | 0.151456 |
| 157 | 5 | 0.074766 | 0.056075 | 0.125234 | 0.063551 | 0.680374 | 0.181553 | 0.141748 | 0.13301  | 0.128155 | 0.415534 |
| 158 | 5 | 0.106542 | 0.056075 | 0.140187 | 0.136449 | 0.560748 | 0.152427 | 0.079612 | 0.150485 | 0.251456 | 0.366019 |
| 159 | 5 | 0.185047 | 0.074766 | 0.076636 | 0.140187 | 0.523364 | 0.17767  | 0.093204 | 0.116505 | 0.162136 | 0.450485 |
| 160 | 5 | 0.063551 | 0.031776 | 0.170093 | 0.117757 | 0.616822 | 0.179612 | 0.103883 | 0.08835  | 0.127184 | 0.500971 |
| 164 | 5 | 0.072897 | 0.063551 | 0.074766 | 0.185047 | 0.603738 | 0.142718 | 0.070874 | 0.138835 | 0.171845 | 0.475728 |
| 166 | 5 | 0.078505 | 0.11215  | 0.160748 | 0.08785  | 0.560748 | 0.194175 | 0.083495 | 0.067961 | 0.186408 | 0.467961 |
| 172 | 5 | 0.171963 | 0.095327 | 0.145794 | 0.181308 | 0.405607 | 0.2      | 0.058252 | 0.091262 | 0.072816 | 0.57767  |
| 176 | 5 | 0.157009 | 0.104673 | 0.173832 | 0.226168 | 0.338318 | 0.17767  | 0.127184 | 0.08835  | 0.151456 | 0.45534  |
| 177 | 5 | 0.235514 | 0.13271  | 0.127103 | 0.078505 | 0.426168 | 0.082524 | 0.063107 | 0.109709 | 0.062136 | 0.682524 |
| 183 | 5 | 0.123364 | 0.084112 | 0.057944 | 0.080374 | 0.654206 | 0.124272 | 0.091262 | 0.092233 | 0.043689 | 0.648544 |
| 185 | 5 | 0.084112 | 0.039252 | 0.084112 | 0.024299 | 0.768224 | 0.182524 | 0.070874 | 0.072816 | 0.058252 | 0.615534 |
| 186 | 5 | 0.123364 | 0.095327 | 0.042991 | 0.136449 | 0.601869 | 0.143689 | 0.108738 | 0.062136 | 0.046602 | 0.638835 |
| 188 | 5 | 0.143925 | 0.106542 | 0.164486 | 0.085981 | 0.499065 | 0.218447 | 0.057282 | 0.123301 | 0.078641 | 0.52233  |
| 193 | 5 | 0.078505 | 0.130841 | 0.080374 | 0.102804 | 0.607477 | 0.116505 | 0.095146 | 0.064078 | 0.061165 | 0.663107 |

---

Table S4

| Sample number | Class label | FT-MIR-PCs tree votes (Calibration set) |          |          |          |          | NIR-PCs tree votes (Calibration set) |          |          |          |          |
|---------------|-------------|-----------------------------------------|----------|----------|----------|----------|--------------------------------------|----------|----------|----------|----------|
|               |             | Class 1                                 | Class 2  | Class 3  | Class 4  | Class 5  | Class 1                              | Class 2  | Class 3  | Class 4  | Class 5  |
| 36            | 1           | 0.597931                                | 0.164388 | -0.01289 | 0.161221 | 0.089348 | 0.629326                             | 0.113649 | -0.11895 | -0.19694 | 0.572913 |
| 33            | 1           | 0.86831                                 | 0.272421 | 0.160076 | -0.06619 | -0.23462 | 0.579341                             | 0.319409 | -0.03383 | 0.040364 | 0.094714 |
| 12            | 1           | 0.572817                                | 0.101926 | 0.034199 | 0.391442 | -0.10038 | 0.410747                             | -0.04919 | 0.3205   | 0.29664  | 0.021301 |
| 1             | 1           | 0.70159                                 | 0.152812 | 0.226027 | -0.1565  | 0.076066 | 0.716141                             | -0.134   | 0.002468 | 0.349406 | 0.065988 |
| 2             | 1           | 1.04899                                 | -0.22058 | 0.033554 | 0.041898 | 0.096143 | 0.335448                             | 0.029993 | -0.1003  | -0.04374 | 0.778598 |
| 20            | 1           | 0.432027                                | 0.163797 | 0.142196 | 0.15638  | 0.1056   | 0.7877                               | 0.300961 | 0.235255 | -0.02875 | -0.29517 |
| 19            | 1           | 0.642368                                | -0.07632 | 0.220416 | -0.05448 | 0.268016 | 0.803512                             | -0.43617 | 0.053685 | 0.229931 | 0.349043 |
| 27            | 1           | 0.543357                                | 0.089069 | 0.148173 | 0.117285 | 0.102116 | 0.614847                             | 0.061214 | -0.01285 | 0.153177 | 0.183613 |
| 16            | 1           | 0.457262                                | 0.142376 | 0.149428 | 0.047206 | 0.203728 | 0.732576                             | 0.252152 | -0.10843 | -0.01059 | 0.134291 |
| 31            | 1           | 0.114985                                | -0.30488 | 0.569211 | 0.016236 | 0.604445 | 0.182161                             | 0.124424 | 0.545251 | 0.001029 | 0.147136 |
| 3             | 1           | 0.939367                                | 0.245811 | 0.048111 | -0.07055 | -0.16274 | 0.628124                             | -0.0104  | -0.05113 | 0.149914 | 0.283491 |
| 18            | 1           | 0.71585                                 | -0.37588 | -0.14684 | 0.512762 | 0.29411  | 0.480893                             | 0.116245 | 0.027305 | 0.350508 | 0.025048 |
| 9             | 1           | 0.666934                                | 0.009583 | -0.00335 | 0.241861 | 0.08497  | 0.829451                             | -0.08858 | 0.168761 | 0.032527 | 0.057841 |
| 26            | 1           | 0.621763                                | -0.10748 | 0.376221 | 0.023985 | 0.085506 | 0.732867                             | 0.086351 | 0.115084 | -0.0093  | 0.075003 |
| 25            | 1           | 1.13315                                 | 0.148482 | -0.12797 | -0.03109 | -0.12257 | 0.290247                             | 0.312298 | -0.05334 | 0.14669  | 0.304106 |
| 23            | 1           | 0.473342                                | 0.158171 | 0.109112 | 0.244719 | 0.014656 | 0.715474                             | 0.060051 | 0.054279 | -0.11653 | 0.28673  |
| 38            | 1           | 0.326513                                | 0.233704 | 0.415762 | -0.15616 | 0.180181 | 0.527818                             | -0.02694 | 0.034819 | 0.321358 | 0.14294  |
| 14            | 1           | 0.844055                                | -0.06526 | 0.167409 | -0.04463 | 0.098424 | 0.552632                             | 0.219746 | 0.437696 | 0.193293 | -0.40337 |
| 40            | 1           | 0.214108                                | -0.07792 | 0.199447 | 0.122147 | 0.542214 | 0.512405                             | 0.46573  | -0.1935  | 0.253765 | -0.0384  |
| 5             | 1           | 0.701396                                | 0.169225 | 0.050295 | 0.126061 | -0.04698 | 0.835764                             | -0.07283 | -0.15667 | 0.438544 | -0.0448  |
| 29            | 1           | 0.329659                                | 0.33532  | 0.247156 | -0.00855 | 0.096417 | 0.371546                             | -0.16241 | 0.165913 | 0.205902 | 0.419052 |
| 39            | 1           | 0.765143                                | 0.145102 | 0.422831 | -0.08019 | -0.25289 | 0.753105                             | -0.11986 | -0.28929 | 0.419082 | 0.236966 |
| 17            | 1           | 0.552698                                | 0.20592  | 0.41082  | -0.01752 | -0.15192 | 0.415003                             | 0.041352 | 0.125603 | 0.4379   | -0.01986 |
| 7             | 1           | 0.621094                                | 0.147709 | 0.112874 | -0.09805 | 0.216377 | 0.549058                             | 0.046229 | 0.143077 | 0.166253 | 0.095382 |
| 21            | 1           | 0.675329                                | 0.302886 | -0.3228  | 0.320622 | 0.023958 | 0.187454                             | 0.368112 | 0.305157 | 0.225814 | -0.08654 |
| 11            | 1           | 0.530895                                | 0.144515 | 0.099913 | 0.006982 | 0.217695 | 0.51874                              | -0.22488 | 0.238678 | 0.15008  | 0.317381 |
| 62            | 2           | 0.103691                                | 0.606705 | 0.519399 | -0.09033 | -0.13946 | 0.112026                             | 1.00851  | -0.27127 | -0.01141 | 0.162139 |
| 59            | 2           | 0.041449                                | 1.29232  | -0.23302 | 0.243807 | -0.34456 | 0.186184                             | 0.639147 | 0.051864 | 0.132733 | -0.00993 |
| 56            | 2           | -0.61774                                | 1.35864  | 0.394465 | -0.02648 | -0.10888 | 0.022471                             | 0.909046 | -0.0234  | 0.084327 | 0.007558 |
| 72            | 2           | 0.020596                                | 1.11211  | -0.31749 | -0.10157 | 0.286358 | 0.577356                             | 0.521325 | -0.05425 | 0.089252 | -0.13368 |
| 44            | 2           | -0.07303                                | 0.769707 | 0.076266 | 0.018561 | 0.208494 | -0.03576                             | 1.25563  | 0.053314 | -0.21589 | -0.0573  |
| 45            | 2           | -0.15178                                | 0.909009 | -0.18514 | 0.074591 | 0.353325 | 0.083358                             | 0.552356 | 0.257765 | -0.27244 | 0.378965 |
| 63            | 2           | 0.614547                                | 0.413158 | 0.39317  | 0.117801 | -0.53868 | 0.036214                             | 0.446779 | 0.240963 | 0.27307  | 0.002974 |
| 41            | 2           | 0.023296                                | 0.405705 | 0.15309  | 0.272848 | 0.145061 | -0.25885                             | 0.784801 | -0.03246 | 0.465835 | 0.040674 |
| 51            | 2           | 0.095554                                | 0.372138 | 0.387691 | -0.02453 | 0.169147 | -0.12485                             | 1.06072  | -0.02857 | 0.250334 | -0.15764 |
| 79            | 2           | 0.555813                                | 0.675978 | -0.27912 | 0.08077  | -0.03344 | -0.18306                             | 0.938955 | 0.200218 | 0.077028 | -0.03314 |
| 48            | 2           | 0.181706                                | 0.562418 | 0.071366 | 0.169078 | 0.015433 | 0.043228                             | 0.869443 | 0.140387 | 0.151483 | -0.20454 |
| 76            | 2           | 0.412201                                | 0.187349 | 0.361866 | 0.089417 | -0.05083 | 0.133921                             | 0.622326 | 0.201883 | -0.10242 | 0.144289 |
| 68            | 2           | -0.03654                                | 1.06801  | -0.21884 | -0.05164 | 0.239017 | -0.30591                             | 1.04693  | -0.14389 | 0.332451 | 0.070408 |
| 55            | 2           | -0.26147                                | 0.899493 | 0.32405  | 0.051517 | -0.01359 | 0.300065                             | 0.802686 | -0.00965 | -0.00248 | -0.09062 |
| 61            | 2           | 0.121201                                | 0.336353 | 0.123272 | 0.153323 | 0.265852 | 0.047562                             | 0.897036 | -0.18201 | 0.156474 | 0.080935 |
| 74            | 2           | -0.07731                                | 1.0315   | 0.025874 | -0.08888 | 0.108815 | -0.13131                             | 1.15902  | -0.25711 | 0.077739 | 0.151662 |
| 70            | 2           | 0.115256                                | 0.48273  | -0.02033 | 0.276524 | 0.145816 | 0.789435                             | 0.486174 | -0.08549 | 0.045631 | -0.23575 |
| 54            | 2           | -0.09343                                | 0.79807  | -0.05542 | 0.204654 | 0.146127 | 0.414727                             | 0.456267 | 0.29097  | -0.03888 | -0.12309 |
| 66            | 2           | 0.073977                                | 0.859089 | 0.006224 | 0.073306 | -0.0126  | 0.100597                             | 0.592077 | 0.074623 | 0.051622 | 0.181081 |
| 64            | 2           | 0.194152                                | 0.491033 | 0.10146  | 0.154434 | 0.05892  | -0.05844                             | 0.631842 | 0.137394 | 0.161458 | 0.127746 |

---

|     |   |          |          |          |          |          |          |          |          |          |          |
|-----|---|----------|----------|----------|----------|----------|----------|----------|----------|----------|----------|
| 57  | 2 | 0.313809 | 0.670634 | 0.048607 | -0.05087 | 0.017817 | -0.07358 | 0.847932 | 0.302647 | -0.04947 | -0.02753 |
| 75  | 2 | 0.17275  | 0.606984 | -0.21428 | 0.049868 | 0.384672 | 0.298971 | 0.661393 | -0.06781 | 0.080642 | 0.026804 |
| 47  | 2 | 0.358635 | 0.302903 | 0.154394 | 0.093269 | 0.0908   | 0.05444  | 0.929136 | -0.11014 | 0.077657 | 0.048911 |
| 77  | 2 | -0.07968 | 0.705489 | 0.351081 | -0.18872 | 0.211835 | -0.26978 | 0.785171 | 0.302508 | 0.036926 | 0.145179 |
| 53  | 2 | 0.270683 | 0.509466 | 0.051035 | 0.033844 | 0.134972 | -0.12112 | 0.729061 | 0.066369 | 0.193583 | 0.132103 |
| 50  | 2 | -0.17343 | 0.529882 | 0.27834  | 0.134289 | 0.230921 | -0.04525 | 0.747346 | 0.248571 | -0.15666 | 0.205988 |
| 101 | 3 | 0.304068 | -0.30876 | 0.829932 | 0.067448 | 0.107315 | -0.34233 | -0.18454 | 1.15936  | 0.383486 | -0.01598 |
| 91  | 3 | 0.312139 | 0.335089 | 0.551572 | -0.16568 | -0.03312 | 0.200636 | 0.004628 | 0.616141 | 0.132032 | 0.046563 |
| 90  | 3 | 0.231811 | 0.215235 | 0.633421 | 0.099639 | -0.18011 | 0.273707 | -0.06735 | 0.621989 | 0.049274 | 0.122383 |
| 87  | 3 | 0.389706 | 0.044699 | 0.475173 | 0.161257 | -0.07084 | -0.0827  | 0.036354 | 0.475297 | 0.345933 | 0.225119 |
| 99  | 3 | -0.04572 | 0.20626  | 0.261252 | 0.218615 | 0.35959  | 0.215159 | 0.450654 | 0.421526 | 0.034302 | -0.12164 |
| 114 | 3 | 0.2116   | 0.261575 | 0.29695  | 0.257264 | -0.02739 | -0.03566 | -0.18722 | 1.01229  | 0.391636 | -0.18105 |
| 116 | 3 | 0.340575 | 0.220081 | 0.357376 | 0.329191 | -0.24722 | -0.00469 | -0.22412 | 0.794243 | 0.230967 | 0.203606 |
| 102 | 3 | -0.06404 | -0.31194 | 0.727562 | 0.269471 | 0.378948 | 0.046438 | 0.12177  | 0.623265 | 0.150328 | 0.0582   |
| 104 | 3 | 0.188116 | 0.150905 | 0.565705 | -0.10173 | 0.197004 | 0.048202 | 0.020584 | 1.1792   | -0.29045 | 0.042466 |
| 83  | 3 | 0.279599 | 0.135423 | 0.593482 | -0.07587 | 0.067367 | 0.124241 | 0.180048 | 0.599054 | 0.024325 | 0.072332 |
| 110 | 3 | 0.038836 | 0.193956 | 0.394538 | 0.021912 | 0.350758 | 0.160332 | 0.022919 | 0.73405  | 0.01758  | 0.06512  |
| 108 | 3 | 0.338913 | -0.03964 | 0.407012 | -0.07072 | 0.364437 | -0.01026 | 0.045448 | 1.06763  | 0.059102 | -0.16192 |
| 81  | 3 | -0.04094 | 0.079015 | 0.643693 | 0.281115 | 0.037119 | 0.344364 | 0.03856  | 0.776904 | -0.06084 | -0.09899 |
| 107 | 3 | -0.00588 | 0.138796 | 0.17447  | -0.04829 | 0.740906 | 0.234755 | -0.01384 | 0.932104 | 0.041972 | -0.19499 |
| 112 | 3 | 0.301787 | -0.01263 | 0.415397 | -0.09713 | 0.392575 | 0.118205 | 0.174433 | 0.807519 | 0.0158   | -0.11596 |
| 113 | 3 | 0.174963 | 0.133787 | 0.375498 | 0.06633  | 0.249422 | 0.038373 | 0.224671 | 0.449967 | 0.266302 | 0.020686 |
| 97  | 3 | 0.156073 | 0.231393 | 0.552628 | 0.09254  | -0.03263 | 0.1646   | 0.259188 | 0.655404 | -0.0961  | 0.016907 |
| 85  | 3 | 0.086218 | 0.013026 | 0.484573 | 0.34842  | 0.067763 | 0.31413  | 0.078795 | 0.788455 | 0.003389 | -0.18477 |
| 109 | 3 | -0.02709 | 0.123825 | 0.326619 | 0.248693 | 0.327949 | 0.057488 | 0.14655  | 0.579773 | 0.122592 | 0.093599 |
| 105 | 3 | -0.06142 | 0.010319 | 0.412994 | 0.219476 | 0.418626 | -0.04041 | 0.010086 | 0.963305 | 0.034993 | 0.032024 |
| 100 | 3 | 0.252751 | 0.092081 | 0.351381 | 0.144862 | 0.158925 | -0.06175 | 0.06709  | 0.82107  | 0.116931 | 0.056658 |
| 111 | 3 | 0.379739 | 0.123235 | 0.44551  | -0.06719 | 0.118703 | 0.1696   | -0.06027 | 0.695583 | -0.02662 | 0.221702 |
| 96  | 3 | -0.30572 | -0.0402  | 0.40731  | 0.54195  | 0.396662 | -0.03459 | 0.093274 | 0.694841 | 0.22674  | 0.019734 |
| 106 | 3 | 0.293299 | 0.302482 | 0.442362 | 0.019424 | -0.05757 | -0.04259 | 0.06572  | 0.820906 | 0.001892 | 0.154072 |
| 152 | 4 | 0.073186 | 0.020554 | 0.288142 | 0.541577 | 0.076542 | 0.273314 | 0.331002 | 0.213905 | 0.411975 | -0.2302  |
| 121 | 4 | 0.011994 | -0.15397 | -0.03448 | 1.1502   | 0.026259 | 0.145914 | -0.01511 | 0.074093 | 0.787902 | 0.007199 |
| 125 | 4 | -0.04281 | -0.25763 | -0.06702 | 1.06834  | 0.299126 | -0.11683 | 0.067847 | 0.026254 | 1.09033  | -0.0676  |
| 128 | 4 | -0.05115 | -0.08939 | -0.25263 | 1.42659  | -0.03343 | 0.28408  | -0.13794 | 0.304602 | 0.442232 | 0.107025 |
| 145 | 4 | -0.06312 | 0.199692 | 0.067601 | 1.06889  | -0.27305 | -0.01032 | 0.0183   | 0.014919 | 1.07039  | -0.09329 |
| 156 | 4 | 0.120301 | -0.12325 | 0.291068 | 0.775799 | -0.06392 | 0.439136 | 0.194802 | -0.10743 | 0.600643 | -0.12715 |
| 126 | 4 | 0.219146 | 0.043436 | 0.129754 | 0.753694 | -0.14603 | -0.23937 | 0.240876 | -0.00227 | 0.788503 | 0.212256 |
| 131 | 4 | 0.200602 | 0.281689 | -0.08851 | 0.783848 | -0.17763 | 0.527318 | -0.01672 | 7.67E-05 | 0.647148 | -0.15782 |
| 117 | 4 | 0.180148 | 0.230828 | 0.02476  | 0.356876 | 0.207388 | -0.26221 | -0.23431 | 0.272161 | 0.97374  | 0.250618 |
| 122 | 4 | 0.020187 | 0.06892  | 0.232172 | 0.522172 | 0.156549 | 0.226879 | 0.01435  | 0.049204 | 0.442647 | 0.26692  |
| 149 | 4 | 0.272754 | 0.020376 | 0.098412 | 0.629756 | -0.0213  | 0.192002 | 0.015746 | 0.330461 | 0.588606 | -0.12682 |
| 153 | 4 | 0.069084 | 0.193544 | 0.028956 | 0.427775 | 0.280642 | -0.07237 | -0.13764 | -0.00023 | 1.06375  | 0.146489 |
| 146 | 4 | 0.237058 | -0.07075 | 0.043573 | 0.483547 | 0.306575 | 0.203301 | 0.008411 | 0.139033 | 0.655326 | -0.00607 |
| 123 | 4 | -0.02919 | 0.11696  | 0.008958 | 0.928362 | -0.02509 | 0.235272 | 0.024333 | 0.140535 | 0.560502 | 0.039358 |
| 139 | 4 | 0.027797 | 0.020153 | -0.04032 | 0.965166 | 0.027204 | 0.169704 | 0.197536 | -0.09229 | 0.486448 | 0.238605 |
| 140 | 4 | 0.11626  | 0.041187 | 0.088046 | 0.625472 | 0.129035 | 0.107508 | -0.1054  | 0.055032 | 1.00982  | -0.06696 |
| 137 | 4 | -0.01057 | 0.205609 | 0.399568 | 0.242153 | 0.163237 | 0.245164 | 0.300276 | 0.225973 | 0.274814 | -0.04623 |
| 144 | 4 | 0.177154 | 0.171424 | 0.105599 | 0.272758 | 0.273064 | 0.271303 | 0.236086 | 0.136538 | 0.342253 | 0.01382  |
| 130 | 4 | 0.057383 | 0.143664 | 0.08647  | 0.864286 | -0.1518  | 0.325262 | 0.217725 | 0.046569 | 0.315095 | 0.095348 |

---

---

|     |   |          |          |          |          |          |          |          |          |          |          |
|-----|---|----------|----------|----------|----------|----------|----------|----------|----------|----------|----------|
| 118 | 4 | 0.021859 | 0.165215 | 0.184612 | 0.195823 | 0.432491 | 0.374222 | -0.01746 | -0.36652 | 1.06246  | -0.05269 |
| 148 | 4 | 0.302596 | 0.050456 | 0.228985 | 0.44679  | -0.02883 | 0.373895 | 0.142443 | 0.045869 | 0.373071 | 0.064723 |
| 134 | 4 | -0.2757  | -0.0408  | 0.432173 | 0.984047 | -0.09972 | -0.08752 | 0.059961 | 0.158789 | 0.640794 | 0.227979 |
| 141 | 4 | 0.052681 | 0.209003 | 0.01913  | 0.427085 | 0.292101 | 0.014597 | 0.035519 | 0.011871 | 0.784898 | 0.153116 |
| 136 | 4 | 0.040367 | 0.070593 | 0.149942 | 0.791673 | -0.05257 | -0.14663 | 0.163876 | 0.201432 | 0.840148 | -0.05883 |
| 154 | 4 | -0.09551 | 0.065574 | 0.249192 | 0.513177 | 0.267565 | 0.495562 | -0.13478 | 0.183118 | 0.606581 | -0.15048 |
| 129 | 4 | 0.114396 | 0.085786 | 0.086835 | 0.391765 | 0.321219 | 0.187131 | 0.41888  | 0.113881 | 0.234487 | 0.04562  |
| 192 | 5 | 0.105974 | 0.21009  | 0.123855 | 0.035483 | 0.524597 | 0.324229 | -0.06989 | -0.05389 | -0.05452 | 0.854076 |
| 171 | 5 | -0.01492 | -0.17996 | 0.164204 | 0.16578  | 0.864893 | 0.022715 | 0.426374 | -0.22078 | 0.040803 | 0.730891 |
| 169 | 5 | 0.168724 | 0.214974 | -0.16847 | 0.201774 | 0.582993 | 0.068817 | -0.00239 | 0.066901 | 0.416297 | 0.450375 |
| 162 | 5 | -0.19447 | 0.177066 | 0.287113 | 0.157579 | 0.572708 | 0.07196  | 0.276179 | 0.373358 | -0.39729 | 0.675789 |
| 182 | 5 | 0.383366 | 0.146621 | -0.18475 | -0.06348 | 0.718244 | 0.225322 | -0.12442 | -0.0991  | 0.239143 | 0.759054 |
| 190 | 5 | -0.04333 | 0.269504 | 0.203401 | 0.287112 | 0.283311 | 0.153574 | -0.00633 | 0.089794 | -0.12213 | 0.885089 |
| 167 | 5 | 0.259003 | -0.02376 | 0.495774 | -0.11565 | 0.384628 | 0.45412  | 0.074541 | -0.02906 | 0.040915 | 0.459489 |
| 178 | 5 | 0.216956 | -0.11627 | 0.162537 | -0.04271 | 0.779486 | 0.153435 | 0.241154 | -0.19317 | 0.125628 | 0.672954 |
| 196 | 5 | 0.079427 | -0.01097 | -0.05604 | 0.20681  | 0.780768 | 0.315353 | -0.02928 | -0.04618 | -0.02447 | 0.784579 |
| 165 | 5 | 0.078713 | -0.16178 | 0.2597   | 0.446882 | 0.376484 | 0.315467 | -0.14357 | 0.18051  | -0.06282 | 0.710419 |
| 187 | 5 | 0.114424 | 0.296935 | 0.2529   | -0.13302 | 0.468758 | 0.018637 | 0.162408 | 0.104353 | 0.005318 | 0.709284 |
| 191 | 5 | -0.1397  | -0.09728 | 0.462027 | 0.160716 | 0.614228 | -0.11451 | -0.31068 | 0.158645 | -0.00629 | 1.27284  |
| 184 | 5 | -0.06252 | 0.253851 | 0.15568  | 0.2433   | 0.40969  | -0.25285 | 0.157682 | 0.262791 | -0.18737 | 1.01974  |
| 161 | 5 | -0.21152 | 0.354774 | 0.137756 | 0.074843 | 0.64415  | 0.099665 | -0.11008 | 0.161871 | 0.029266 | 0.819277 |
| 180 | 5 | 0.187055 | 0.005876 | 0.215989 | 0.087011 | 0.504069 | -0.00874 | 0.148521 | -0.18953 | 0.109247 | 0.940503 |
| 175 | 5 | -0.29862 | 0.464767 | 0.208889 | 0.184707 | 0.440258 | 0.291333 | -0.12401 | 0.178556 | -0.22005 | 0.874165 |
| 179 | 5 | 0.209983 | -0.07119 | 0.185997 | -0.11744 | 0.79265  | 0.240163 | 0.005967 | -0.09508 | 0.307189 | 0.541765 |
| 168 | 5 | 0.412163 | -0.02121 | -0.05816 | -0.06707 | 0.734284 | 0.170022 | 0.139036 | -0.0364  | -0.15582 | 0.883153 |
| 189 | 5 | 0.404423 | 0.060669 | -0.084   | -0.36589 | 0.984798 | 0.197291 | -0.05983 | -0.42079 | 0.544867 | 0.738462 |
| 173 | 5 | 0.149326 | 0.056989 | 0.117838 | -0.00188 | 0.677731 | 0.133037 | -0.12775 | 0.097069 | 0.149847 | 0.747793 |
| 194 | 5 | 0.068689 | 0.077621 | 0.517278 | 0.038248 | 0.298164 | 0.213898 | 0.054909 | 0.054327 | 0.166971 | 0.509895 |
| 195 | 5 | 0.123621 | 0.101637 | 0.167993 | 0.116788 | 0.489961 | 0.027073 | 0.080444 | -0.00557 | -0.15596 | 1.05401  |
| 170 | 5 | 0.021328 | -0.07078 | 0.054999 | 0.205121 | 0.789335 | 0.081361 | 0.190756 | -0.02478 | 0.017925 | 0.734742 |
| 174 | 5 | 0.072791 | 0.100366 | 0.093928 | 0.205076 | 0.527839 | -0.01939 | 0.047672 | 0.160985 | -0.04648 | 0.857213 |
| 163 | 5 | 0.147986 | 0.045893 | 0.069147 | 0.178848 | 0.558126 | 0.476254 | -0.18554 | 0.003899 | 0.064842 | 0.640548 |
| 181 | 5 | 0.088996 | -0.11309 | 0.299607 | 0.096669 | 0.62782  | 0.045173 | 0.122322 | -0.10285 | -0.14013 | 1.07548  |

---

Table S5

| Sample number | Class label | FT-MIR-PCs tree votes (Validation set) |          |          |          |          | NIR-PCs tree votes (Validation set) |          |          |          |          |
|---------------|-------------|----------------------------------------|----------|----------|----------|----------|-------------------------------------|----------|----------|----------|----------|
|               |             | Class 1                                | Class 2  | Class 3  | Class 4  | Class 5  | Class 1                             | Class 2  | Class 3  | Class 4  | Class 5  |
| 4             | 1           | 0.556318                               | 0.214588 | -0.00284 | 0.18775  | 0.044186 | 0.336733                            | 0.060922 | 0.257577 | 0.045102 | 0.299667 |
| 6             | 1           | 0.345489                               | 0.026074 | 0.07687  | 0.314535 | 0.237032 | 0.390643                            | 0.038926 | 0.153193 | 0.514327 | -0.09709 |
| 8             | 1           | 0.64447                                | 0.159397 | -0.24348 | 0.30763  | 0.13198  | 0.796322                            | -0.1688  | 0.183041 | 0.128509 | 0.060924 |
| 10            | 1           | 0.557143                               | 0.042503 | 0.084181 | 0.12049  | 0.195683 | 0.486003                            | -0.14801 | 0.232206 | 0.184113 | 0.245692 |
| 13            | 1           | 0.472519                               | -0.08798 | 0.198399 | 0.197858 | 0.219208 | 0.462042                            | -0.23317 | 0.035837 | 0.425839 | 0.309451 |
| 15            | 1           | 0.550023                               | -0.06615 | 0.045254 | 0.412062 | 0.058812 | 0.474072                            | 0.251561 | 0.38327  | 0.072015 | -0.18092 |
| 22            | 1           | 0.399308                               | 0.084315 | 0.019647 | 0.234918 | 0.261812 | 0.472007                            | 0.119139 | 0.161046 | 0.120483 | 0.127326 |
| 24            | 1           | 0.285141                               | 0.170383 | 0.109369 | 0.246926 | 0.188181 | 0.489641                            | 0.099926 | 0.143729 | 0.207078 | 0.059626 |
| 28            | 1           | 0.241431                               | 0.089347 | 0.297309 | 0.150271 | 0.221642 | 0.81034                             | -0.09729 | 0.137649 | 0.002503 | 0.146798 |
| 30            | 1           | 0.879942                               | 0.128428 | 0.356793 | -0.14822 | -0.21694 | 0.767284                            | 0.071131 | 0.179251 | -0.03553 | 0.017861 |
| 32            | 1           | 0.742422                               | 0.290095 | 0.148222 | -0.13795 | -0.04279 | 0.602853                            | 0.132809 | -0.08061 | 0.001104 | 0.343844 |
| 34            | 1           | 0.517709                               | -0.00813 | 0.195986 | 0.009069 | 0.285362 | 0.865393                            | -0.21393 | 0.397831 | 0.085481 | -0.13477 |
| 35            | 1           | 0.388407                               | -0.041   | 0.423362 | -0.05035 | 0.279581 | 0.484938                            | 0.080371 | -0.24888 | 0.34085  | 0.342719 |
| 37            | 1           | 0.496167                               | 0.15004  | 0.364535 | 0.001946 | -0.01269 | 0.750747                            | -0.08523 | -0.01036 | 0.211371 | 0.133472 |
| 42            | 2           | 0.123822                               | 0.44338  | 0.118988 | 0.142577 | 0.171235 | 0.418317                            | 0.327362 | 0.007809 | 0.209094 | 0.037419 |
| 43            | 2           | 0.057731                               | 0.457544 | 0.102578 | 0.251987 | 0.13016  | 0.41772                             | 0.304946 | 0.076254 | 0.254663 | -0.05358 |
| 46            | 2           | 0.042326                               | 0.586553 | -0.01673 | 0.150467 | 0.237388 | 0.259616                            | 0.363906 | -0.06286 | 0.149928 | 0.289413 |
| 49            | 2           | 0.181345                               | 0.606676 | 0.205004 | 0.007477 | -0.0005  | 0.282055                            | 0.693737 | -0.06391 | 0.182279 | -0.09416 |
| 52            | 2           | 0.055452                               | 0.501261 | 0.143565 | 0.12913  | 0.170593 | 0.238359                            | 0.53498  | 0.015119 | 0.221014 | -0.00947 |
| 58            | 2           | 0.080449                               | 0.674165 | 0.090953 | 0.084855 | 0.069578 | 0.036267                            | 0.683262 | 0.058285 | -0.01334 | 0.235525 |
| 60            | 2           | 0.246211                               | 0.658697 | -0.19334 | 0.204197 | 0.084237 | 0.28025                             | 0.619561 | -0.10715 | 0.197944 | 0.009394 |
| 65            | 2           | 0.188806                               | 0.513181 | 0.17897  | -0.0196  | 0.138646 | 0.010651                            | 0.896871 | -0.25786 | 0.087667 | 0.262669 |
| 67            | 2           | -0.05059                               | 0.754613 | 0.095535 | 0.160646 | 0.039801 | 0.064844                            | 0.5506   | 0.290648 | 0.39028  | -0.29637 |
| 69            | 2           | 0.123692                               | 0.524794 | 0.298485 | -0.00037 | 0.053396 | -0.09981                            | 1.06515  | 0.180738 | -0.15273 | 0.00664  |
| 71            | 2           | -0.04426                               | 0.534048 | 0.394476 | -0.0419  | 0.157635 | 0.079716                            | 0.928489 | -0.05394 | 0.187462 | -0.14172 |
| 73            | 2           | 0.019242                               | 0.660525 | 0.101584 | 0.121229 | 0.09742  | 0.145657                            | 0.660375 | 0.272644 | -0.0921  | 0.013427 |
| 78            | 2           | 0.068094                               | 0.739191 | -0.08767 | 0.059738 | 0.220646 | -0.17851                            | 0.916661 | 0.176329 | 0.060597 | 0.024921 |
| 80            | 2           | 0.112094                               | 0.419513 | -0.02478 | 0.185029 | 0.308145 | -0.05478                            | 0.576168 | -0.00725 | 0.035562 | 0.450296 |
| 82            | 3           | 0.257177                               | 0.135249 | 0.44248  | -0.00042 | 0.165516 | 0.25498                             | 0.134327 | 0.445111 | 0.268506 | -0.10292 |
| 84            | 3           | 0.136507                               | 0.149636 | 0.432791 | 0.172499 | 0.108566 | -0.17442                            | 0.216385 | 0.949182 | 0.084149 | -0.0753  |
| 86            | 3           | 0.220052                               | 0.138735 | 0.437148 | 0.115193 | 0.088872 | 0.135369                            | -0.07204 | 0.604658 | 0.271334 | 0.060674 |
| 88            | 3           | -0.06982                               | 0.171922 | 0.279162 | 0.195019 | 0.423721 | 0.158954                            | 0.001729 | 0.65633  | 0.084716 | 0.098271 |
| 89            | 3           | -0.13472                               | 0.183704 | 0.238779 | 0.272142 | 0.440091 | 0.134716                            | -0.06018 | 0.785965 | 0.05351  | 0.085985 |
| 92            | 3           | 0.239074                               | 0.288794 | 0.425272 | -0.02324 | 0.070102 | 0.208065                            | 0.331145 | 0.59149  | -0.182   | 0.051304 |
| 93            | 3           | 0.284963                               | 0.16928  | 0.341851 | 0.134091 | 0.069815 | -0.1008                             | 0.031589 | 0.906255 | -0.17265 | 0.33561  |
| 94            | 3           | 0.151631                               | 0.152134 | 0.387887 | 0.22899  | 0.079358 | 0.28673                             | -0.00056 | 0.504722 | -0.09813 | 0.307232 |
| 95            | 3           | 0.31709                                | 0.278125 | 0.440652 | -0.07169 | 0.035823 | 0.107984                            | 0.006537 | 0.752368 | 0.017911 | 0.115201 |
| 98            | 3           | -0.04451                               | 0.32351  | 0.252888 | 0.240546 | 0.227569 | 0.347147                            | 0.024359 | 0.533589 | -0.09971 | 0.194613 |
| 103           | 3           | -0.06962                               | 0.069258 | 0.477546 | 0.332674 | 0.190142 | -0.27979                            | 0.142642 | 0.711013 | 0.274796 | 0.151336 |
| 115           | 3           | 0.055563                               | 0.35888  | 0.412347 | 0.152884 | 0.020326 | 0.201608                            | -0.00845 | 0.764708 | 0.227156 | -0.18502 |
| 119           | 4           | -0.09216                               | 0.212433 | 0.213688 | 0.94245  | -0.27641 | 0.046241                            | 0.229853 | -0.02327 | 0.569103 | 0.178077 |
| 120           | 4           | -0.08475                               | 0.111964 | 0.064566 | 0.931184 | -0.02296 | 0.151367                            | -0.02508 | 0.190301 | 0.591096 | 0.092312 |
| 124           | 4           | 0.045404                               | 0.277649 | 0.106852 | 0.68299  | -0.1129  | 0.425273                            | 0.030904 | 0.146724 | 0.574649 | -0.17755 |
| 127           | 4           | -0.07499                               | 0.279413 | -0.08433 | 1.0589   | -0.17899 | 0.160214                            | 0.129721 | 0.414294 | 0.484116 | -0.18835 |
| 132           | 4           | -0.083                                 | 0.242329 | 0.05169  | 0.934001 | -0.14502 | 0.596815                            | -0.05043 | -0.02556 | 0.572522 | -0.09334 |
| 133           | 4           | 0.101048                               | 0.14792  | -0.08647 | 0.83376  | 0.003743 | 0.119816                            | 0.161369 | 0.151957 | 0.567357 | -0.0005  |

---

|     |   |          |          |          |          |          |          |          |          |          |          |
|-----|---|----------|----------|----------|----------|----------|----------|----------|----------|----------|----------|
| 135 | 4 | 0.005472 | 0.235083 | 0.075173 | 0.302055 | 0.382216 | 0.069047 | 0.097669 | 0.183404 | 0.516011 | 0.133869 |
| 138 | 4 | -0.04733 | 0.218716 | 0.208353 | 0.404734 | 0.215526 | 0.199122 | 0.163549 | 0.288038 | 0.394456 | -0.04516 |
| 142 | 4 | 0.061696 | -0.00486 | 0.261805 | 0.531797 | 0.149566 | 0.023141 | 0.208705 | 0.068737 | 0.490489 | 0.208929 |
| 143 | 4 | -0.05365 | -0.04916 | 0.28764  | 0.578253 | 0.236922 | 0.1225   | 0.099443 | 0.555304 | 0.192175 | 0.030579 |
| 147 | 4 | -0.02753 | 0.114521 | 0.10019  | 0.52898  | 0.283836 | 0.11759  | 0.057658 | 0.208331 | 0.391678 | 0.224742 |
| 150 | 4 | 0.197817 | 0.002403 | 0.14184  | 0.439556 | 0.218385 | 0.328323 | -0.02727 | 0.176323 | 0.546402 | -0.02378 |
| 151 | 4 | -0.03436 | 0.130725 | 0.176951 | 0.531251 | 0.19543  | 0.268457 | 0.02086  | -0.06045 | 0.531746 | 0.239383 |
| 155 | 4 | -0.07592 | 0.194658 | 0.364302 | 0.34591  | 0.171048 | 0.163938 | 0.22711  | 0.019221 | 0.273322 | 0.31641  |
| 157 | 5 | 0.071081 | -0.10458 | 0.138297 | 0.163488 | 0.731716 | 0.175873 | 0.144691 | -0.07857 | 0.177422 | 0.580583 |
| 158 | 5 | -0.01434 | 0.003875 | 0.251583 | 0.202397 | 0.556487 | 0.336861 | -0.08054 | 0.15333  | 0.276561 | 0.313793 |
| 159 | 5 | 0.163042 | 0.095325 | 0.038296 | 0.197456 | 0.505881 | 0.204673 | 0.189022 | -0.07226 | 0.196459 | 0.482102 |
| 160 | 5 | 0.001074 | -0.08563 | 0.13277  | 0.36083  | 0.590956 | 0.456186 | -0.01022 | -0.12682 | 0.107219 | 0.573638 |
| 164 | 5 | 0.034998 | 0.003172 | 0.155464 | 0.361848 | 0.444518 | 0.178191 | -0.0483  | 0.06519  | 0.234098 | 0.570816 |
| 166 | 5 | 0.001045 | -0.03279 | 0.309678 | 0.016584 | 0.705481 | 0.226693 | 0.093414 | -0.12966 | 0.246743 | 0.562811 |
| 172 | 5 | 0.1109   | 0.052248 | 0.215498 | 0.134511 | 0.486844 | 0.486445 | -0.20266 | 0.085788 | 0.119021 | 0.511404 |
| 176 | 5 | 0.031761 | 0.018122 | 0.244769 | 0.221951 | 0.483397 | 0.360301 | 0.092742 | -0.28844 | 0.140027 | 0.695366 |
| 177 | 5 | 0.229924 | 0.124458 | 0.179607 | -0.07894 | 0.544953 | 0.046675 | 0.106631 | 0.128897 | -0.13267 | 0.850464 |
| 183 | 5 | 0.078339 | 0.070088 | 0.145353 | 0.043102 | 0.663118 | 0.065284 | 0.069762 | 0.086698 | -0.08068 | 0.858938 |
| 185 | 5 | 0.208755 | -0.14639 | 0.18296  | -0.16296 | 0.917643 | 0.276303 | 0.176467 | 0.053952 | -0.07504 | 0.568321 |
| 186 | 5 | 0.079643 | 0.058651 | 0.14349  | 0.065512 | 0.652704 | 0.023116 | -0.064   | 0.263001 | -0.24402 | 1.02191  |
| 188 | 5 | 0.089812 | -0.04397 | 0.309688 | 0.099405 | 0.545065 | 0.330447 | 0.004715 | 0.04323  | 0.075962 | 0.545646 |
| 193 | 5 | -0.14245 | 0.178626 | 0.011237 | 0.123821 | 0.828762 | -0.10261 | 0.091638 | -0.08605 | -0.16746 | 1.26448  |

---



Table S6

| Sample number | Class label | FT-MIR-RFE tree votes (Calibration set) |          |          |          |          | NIR-RFE tree votes (Calibration set) |          |          |          |          |
|---------------|-------------|-----------------------------------------|----------|----------|----------|----------|--------------------------------------|----------|----------|----------|----------|
|               |             | Class 1                                 | Class 2  | Class 3  | Class 4  | Class 5  | Class 1                              | Class 2  | Class 3  | Class 4  | Class 5  |
| 36            | 1           | 0.428571                                | 0.125    | 0.089286 | 0.089286 | 0.267857 | 0.356757                             | 0.084685 | 0.091892 | 0.190991 | 0.275676 |
| 33            | 1           | 0.798077                                | 0.048077 | 0.076923 | 0        | 0.076923 | 0.360656                             | 0.083789 | 0.091075 | 0.052823 | 0.411658 |
| 12            | 1           | 0.41                                    | 0.23     | 0.25     | 0.07     | 0.04     | 0.287449                             | 0.121457 | 0.198381 | 0.143725 | 0.248988 |
| 1             | 1           | 0.5                                     | 0.064815 | 0.222222 | 0.166667 | 0.046296 | 0.432971                             | 0.023551 | 0.099638 | 0.036232 | 0.407609 |
| 2             | 1           | 0.09901                                 | 0.158416 | 0.405941 | 0.277228 | 0.059406 | 0.401099                             | 0.029304 | 0.06044  | 0.069597 | 0.43956  |
| 20            | 1           | 0.582524                                | 0.048544 | 0.019417 | 0.029126 | 0.320388 | 0.217726                             | 0.22158  | 0.235067 | 0.256262 | 0.069364 |
| 19            | 1           | 0.654867                                | 0.061947 | 0.221239 | 0.035398 | 0.026549 | 0.19337                              | 0.414365 | 0.191529 | 0.145488 | 0.055249 |
| 27            | 1           | 0.943925                                | 0.009346 | 0.018692 | 0.009346 | 0.018692 | 0.331481                             | 0.124074 | 0.124074 | 0.092593 | 0.327778 |
| 16            | 1           | 0.537736                                | 0.028302 | 0.04717  | 0.028302 | 0.358491 | 0.191095                             | 0.168831 | 0.231911 | 0.376623 | 0.03154  |
| 31            | 1           | 0.336449                                | 0.224299 | 0.018692 | 0.130841 | 0.28972  | 0.414855                             | 0.067029 | 0.048913 | 0.072464 | 0.396739 |
| 3             | 1           | 0.547368                                | 0.115789 | 0.210526 | 0.063158 | 0.063158 | 0.524254                             | 0.08209  | 0.074627 | 0.039179 | 0.279851 |
| 18            | 1           | 0.779817                                | 0.055046 | 0.018349 | 0.055046 | 0.091743 | 0.282609                             | 0.313406 | 0.231884 | 0.139493 | 0.032609 |
| 9             | 1           | 0.847619                                | 0.085714 | 0.019048 | 0.019048 | 0.028571 | 0.495528                             | 0.053667 | 0.173524 | 0.033989 | 0.243292 |
| 26            | 1           | 0.54902                                 | 0.205882 | 0.068627 | 0.019608 | 0.156863 | 0.630769                             | 0.086538 | 0.153846 | 0.032692 | 0.096154 |
| 25            | 1           | 0.376                                   | 0.144    | 0.048    | 0.184    | 0.248    | 0.423529                             | 0.060784 | 0.2      | 0.139216 | 0.176471 |
| 23            | 1           | 0.352941                                | 0.107843 | 0.147059 | 0.235294 | 0.156863 | 0.245779                             | 0.140713 | 0.187617 | 0.223265 | 0.202627 |
| 38            | 1           | 0.55102                                 | 0.255102 | 0.030612 | 0.061224 | 0.102041 | 0.549645                             | 0.090426 | 0.124113 | 0.04078  | 0.195035 |
| 14            | 1           | 0.543689                                | 0.07767  | 0.067961 | 0.126214 | 0.184466 | 0.195029                             | 0.231358 | 0.231358 | 0.33652  | 0.005736 |
| 40            | 1           | 0.424779                                | 0.265487 | 0.141593 | 0.053097 | 0.115044 | 0.376448                             | 0.073359 | 0.083012 | 0.061776 | 0.405405 |
| 5             | 1           | 0.793814                                | 0.082474 | 0.061856 | 0.020619 | 0.041237 | 0.283662                             | 0.104129 | 0.195691 | 0.344704 | 0.071813 |
| 29            | 1           | 0.907407                                | 0.027778 | 0.027778 | 0        | 0.037037 | 0.662879                             | 0.104167 | 0.100379 | 0.034091 | 0.098485 |
| 39            | 1           | 0.810811                                | 0.045045 | 0.036036 | 0.045045 | 0.063063 | 0.528155                             | 0.126214 | 0.099029 | 0.087379 | 0.159223 |
| 17            | 1           | 0.523364                                | 0.028037 | 0.084112 | 0.037383 | 0.327103 | 0.23327                              | 0.321224 | 0.217973 | 0.128107 | 0.099426 |
| 7             | 1           | 0.757282                                | 0.126214 | 0.087379 | 0.019417 | 0.009709 | 0.454365                             | 0.134921 | 0.186508 | 0.107143 | 0.117063 |
| 21            | 1           | 0.18018                                 | 0.081081 | 0.252252 | 0.27027  | 0.216216 | 0.177388                             | 0.031189 | 0.037037 | 0.060429 | 0.693957 |
| 11            | 1           | 0.822222                                | 0.066667 | 0.055556 | 0.011111 | 0.044444 | 0.449438                             | 0.031835 | 0.117978 | 0.104869 | 0.29588  |
| 62            | 2           | 0.035088                                | 0.719298 | 0.210526 | 0.026316 | 0.008772 | 0.098456                             | 0.73166  | 0.125483 | 0.034749 | 0.009653 |
| 59            | 2           | 0.23301                                 | 0.398058 | 0.174757 | 0.07767  | 0.116505 | 0.108159                             | 0.609108 | 0.163188 | 0.096774 | 0.02277  |
| 56            | 2           | 0.103448                                | 0.353448 | 0.206897 | 0.103448 | 0.232759 | 0.168856                             | 0.559099 | 0.146341 | 0.099437 | 0.026266 |
| 72            | 2           | 0.067797                                | 0.610169 | 0.186441 | 0.042373 | 0.09322  | 0.176147                             | 0.581651 | 0.07156  | 0.097248 | 0.073394 |
| 44            | 2           | 0.034884                                | 0.5      | 0.383721 | 0.034884 | 0.046512 | 0.146691                             | 0.531306 | 0.152057 | 0.096601 | 0.073345 |
| 45            | 2           | 0.201923                                | 0.384615 | 0.259615 | 0.067308 | 0.086538 | 0.132296                             | 0.505837 | 0.237354 | 0.087549 | 0.036965 |
| 63            | 2           | 0.069307                                | 0.445545 | 0.128713 | 0.237624 | 0.118812 | 0.1171                               | 0.457249 | 0.208178 | 0.152416 | 0.065056 |
| 41            | 2           | 0.12605                                 | 0.05042  | 0.10084  | 0.201681 | 0.521008 | 0.184502                             | 0.151292 | 0.132841 | 0.494465 | 0.0369   |
| 51            | 2           | 0.214953                                | 0.514019 | 0.205607 | 0.018692 | 0.046729 | 0.302326                             | 0.412791 | 0.160853 | 0.036822 | 0.087209 |
| 79            | 2           | 0.067961                                | 0.61165  | 0.135922 | 0.038835 | 0.145631 | 0.117537                             | 0.735075 | 0.052239 | 0.048507 | 0.046642 |
| 48            | 2           | 0.111111                                | 0.648148 | 0.092593 | 0.046296 | 0.101852 | 0.186898                             | 0.55684  | 0.073218 | 0.142582 | 0.040462 |
| 76            | 2           | 0.091743                                | 0.541284 | 0.174312 | 0.036697 | 0.155963 | 0.188119                             | 0.584158 | 0.120792 | 0.055446 | 0.051485 |
| 68            | 2           | 0.19469                                 | 0.256637 | 0.168142 | 0.327434 | 0.053097 | 0.185687                             | 0.441006 | 0.305609 | 0.058027 | 0.009671 |
| 55            | 2           | 0.343434                                | 0.353535 | 0.131313 | 0.070707 | 0.10101  | 0.159785                             | 0.581688 | 0.184919 | 0.050269 | 0.023339 |
| 61            | 2           | 0.046512                                | 0.5      | 0.116279 | 0.27907  | 0.05814  | 0.09369                              | 0.351816 | 0.263862 | 0.258126 | 0.032505 |
| 74            | 2           | 0.230769                                | 0.519231 | 0.115385 | 0.028846 | 0.105769 | 0.094303                             | 0.691552 | 0.143418 | 0.041257 | 0.02947  |
| 70            | 2           | 0                                       | 0.573913 | 0.113043 | 0.26087  | 0.052174 | 0.08958                              | 0.316271 | 0.129799 | 0.420475 | 0.043876 |
| 54            | 2           | 0.191304                                | 0.417391 | 0.286957 | 0.06087  | 0.043478 | 0.252372                             | 0.478178 | 0.1537   | 0.060721 | 0.055028 |
| 66            | 2           | 0.044248                                | 0.778761 | 0.088496 | 0.026549 | 0.061947 | 0.088015                             | 0.659176 | 0.153558 | 0.052434 | 0.046816 |
| 64            | 2           | 0.031579                                | 0.621053 | 0.147368 | 0.168421 | 0.031579 | 0.157801                             | 0.203901 | 0.200355 | 0.391844 | 0.046099 |

---

|     |   |          |          |          |          |          |          |          |          |          |          |
|-----|---|----------|----------|----------|----------|----------|----------|----------|----------|----------|----------|
| 57  | 2 | 0.029126 | 0.757282 | 0.07767  | 0.038835 | 0.097087 | 0.070881 | 0.62069  | 0.118774 | 0.159004 | 0.030651 |
| 75  | 2 | 0.192308 | 0.538462 | 0.067308 | 0.096154 | 0.105769 | 0.117534 | 0.662813 | 0.154143 | 0.032755 | 0.032755 |
| 47  | 2 | 0.066038 | 0.537736 | 0.301887 | 0.028302 | 0.066038 | 0.173358 | 0.538321 | 0.136861 | 0.105839 | 0.04562  |
| 77  | 2 | 0.037037 | 0.444444 | 0.138889 | 0.074074 | 0.305556 | 0.190741 | 0.42963  | 0.212963 | 0.087037 | 0.07963  |
| 53  | 2 | 0.138298 | 0.404255 | 0.138298 | 0.095745 | 0.223404 | 0.20075  | 0.36773  | 0.247655 | 0.140713 | 0.043152 |
| 50  | 2 | 0.02     | 0.76     | 0.13     | 0.04     | 0.05     | 0.139623 | 0.271698 | 0.132075 | 0.375472 | 0.081132 |
| 101 | 3 | 0.142857 | 0.071429 | 0.295918 | 0.326531 | 0.163265 | 0.078    | 0.176    | 0.5      | 0.192    | 0.054    |
| 91  | 3 | 0.144444 | 0.144444 | 0.522222 | 0.011111 | 0.177778 | 0.365714 | 0.24     | 0.16     | 0.08     | 0.154286 |
| 90  | 3 | 0.036036 | 0.207207 | 0.279279 | 0.279279 | 0.198198 | 0.049713 | 0.053537 | 0.156788 | 0.476099 | 0.263862 |
| 87  | 3 | 0.27193  | 0.175439 | 0.438596 | 0.035088 | 0.078947 | 0.339318 | 0.240575 | 0.18851  | 0.071813 | 0.159785 |
| 99  | 3 | 0.09434  | 0.264151 | 0.566038 | 0.04717  | 0.028302 | 0.132353 | 0.481618 | 0.220588 | 0.150735 | 0.014706 |
| 114 | 3 | 0.057143 | 0.485714 | 0.333333 | 0.038095 | 0.085714 | 0.193424 | 0.065764 | 0.510638 | 0.077369 | 0.152805 |
| 116 | 3 | 0.065421 | 0.158879 | 0.626168 | 0.121495 | 0.028037 | 0.15625  | 0.0625   | 0.617647 | 0.073529 | 0.090074 |
| 102 | 3 | 0.091743 | 0.055046 | 0.275229 | 0.440367 | 0.137615 | 0.068783 | 0.137566 | 0.40388  | 0.35097  | 0.038801 |
| 104 | 3 | 0.232323 | 0.151515 | 0.484848 | 0.090909 | 0.040404 | 0.137405 | 0.093511 | 0.59542  | 0.116412 | 0.057252 |
| 83  | 3 | 0.228571 | 0.057143 | 0.619048 | 0.038095 | 0.057143 | 0.230909 | 0.376364 | 0.290909 | 0.069091 | 0.032727 |
| 110 | 3 | 0.091837 | 0.22449  | 0.408163 | 0.132653 | 0.142857 | 0.094096 | 0.086716 | 0.573801 | 0.208487 | 0.0369   |
| 108 | 3 | 0.114286 | 0.180952 | 0.257143 | 0.066667 | 0.380952 | 0.175652 | 0.074783 | 0.56     | 0.111304 | 0.078261 |
| 81  | 3 | 0.066667 | 0.057143 | 0.552381 | 0.152381 | 0.171429 | 0.181004 | 0.263441 | 0.299283 | 0.166667 | 0.089606 |
| 107 | 3 | 0.131579 | 0.035088 | 0.5      | 0.27193  | 0.061404 | 0.10397  | 0.126654 | 0.466919 | 0.238185 | 0.064272 |
| 112 | 3 | 0.009901 | 0.207921 | 0.534653 | 0.227723 | 0.019802 | 0.133333 | 0.04381  | 0.535238 | 0.139048 | 0.148571 |
| 113 | 3 | 0.046729 | 0.280374 | 0.598131 | 0.056075 | 0.018692 | 0.354167 | 0.11553  | 0.371212 | 0.068182 | 0.090909 |
| 97  | 3 | 0.019608 | 0.058824 | 0.401961 | 0.480392 | 0.039216 | 0.099237 | 0.076336 | 0.221374 | 0.55916  | 0.043893 |
| 85  | 3 | 0.067308 | 0.153846 | 0.519231 | 0.163462 | 0.096154 | 0.266284 | 0.266284 | 0.268199 | 0.172414 | 0.02682  |
| 109 | 3 | 0.310345 | 0.172414 | 0.189655 | 0.137931 | 0.189655 | 0.173835 | 0.071685 | 0.523297 | 0.134409 | 0.096774 |
| 105 | 3 | 0        | 0.095745 | 0.56383  | 0.244681 | 0.095745 | 0.052838 | 0.050881 | 0.459883 | 0.330724 | 0.105675 |
| 100 | 3 | 0.045872 | 0.137615 | 0.541284 | 0.211009 | 0.06422  | 0.143925 | 0.24486  | 0.285981 | 0.304673 | 0.020561 |
| 111 | 3 | 0.037736 | 0.141509 | 0.632075 | 0.141509 | 0.04717  | 0.071563 | 0.043315 | 0.45951  | 0.333333 | 0.092279 |
| 96  | 3 | 0.145455 | 0.381818 | 0.381818 | 0.018182 | 0.072727 | 0.180952 | 0.466667 | 0.211429 | 0.097143 | 0.04381  |
| 106 | 3 | 0.094828 | 0.163793 | 0.560345 | 0.137931 | 0.043103 | 0.316505 | 0.132039 | 0.266019 | 0.085437 | 0.2      |
| 152 | 4 | 0.141667 | 0.208333 | 0.416667 | 0.116667 | 0.116667 | 0.21371  | 0.324597 | 0.1875   | 0.233871 | 0.040323 |
| 121 | 4 | 0.204918 | 0.040984 | 0.090164 | 0.581967 | 0.081967 | 0.096774 | 0.125237 | 0.079696 | 0.633776 | 0.064516 |
| 125 | 4 | 0        | 0.136752 | 0.102564 | 0.726496 | 0.034188 | 0.02037  | 0.055556 | 0.196296 | 0.651852 | 0.075926 |
| 128 | 4 | 0.009009 | 0.054054 | 0.081081 | 0.81982  | 0.036036 | 0.105751 | 0.040816 | 0.176252 | 0.58256  | 0.09462  |
| 145 | 4 | 0.115789 | 0.084211 | 0.326316 | 0.336842 | 0.136842 | 0.326886 | 0.158607 | 0.2147   | 0.17795  | 0.121857 |
| 156 | 4 | 0.091837 | 0.112245 | 0.234694 | 0.489796 | 0.071429 | 0.190741 | 0.174074 | 0.162963 | 0.387037 | 0.085185 |
| 126 | 4 | 0        | 0.116667 | 0.066667 | 0.816667 | 0        | 0.134122 | 0.213018 | 0.120316 | 0.319527 | 0.213018 |
| 131 | 4 | 0.050847 | 0.067797 | 0.067797 | 0.788136 | 0.025424 | 0.227437 | 0.274368 | 0.122744 | 0.310469 | 0.064982 |
| 117 | 4 | 0.018692 | 0.028037 | 0.084112 | 0.859813 | 0.009346 | 0.060714 | 0.15     | 0.135714 | 0.632143 | 0.021429 |
| 122 | 4 | 0.059406 | 0.049505 | 0.089109 | 0.782178 | 0.019802 | 0.083176 | 0.151229 | 0.10586  | 0.610586 | 0.049149 |
| 149 | 4 | 0.074074 | 0.037037 | 0.111111 | 0.506173 | 0.271605 | 0.203738 | 0.031776 | 0.22243  | 0.276636 | 0.265421 |
| 153 | 4 | 0.148148 | 0.092593 | 0.25     | 0.333333 | 0.175926 | 0.13945  | 0.111927 | 0.315596 | 0.366972 | 0.066055 |
| 146 | 4 | 0.015385 | 0.007692 | 0.038462 | 0.738462 | 0.2      | 0.272388 | 0.070896 | 0.147388 | 0.330224 | 0.179104 |
| 123 | 4 | 0.044643 | 0.107143 | 0.053571 | 0.785714 | 0.008929 | 0.275194 | 0.22093  | 0.232558 | 0.149225 | 0.122093 |
| 139 | 4 | 0.179245 | 0.04717  | 0.320755 | 0.320755 | 0.132075 | 0.126437 | 0.132184 | 0.249042 | 0.454023 | 0.038314 |
| 140 | 4 | 0.028571 | 0.152381 | 0.104762 | 0.419048 | 0.295238 | 0.037106 | 0.046382 | 0.122449 | 0.755102 | 0.038961 |
| 137 | 4 | 0.096491 | 0.192982 | 0.184211 | 0.219298 | 0.307018 | 0.066148 | 0.081712 | 0.245136 | 0.570039 | 0.036965 |
| 144 | 4 | 0.465517 | 0.155172 | 0.060345 | 0.094828 | 0.224138 | 0.225    | 0.110714 | 0.289286 | 0.291071 | 0.083929 |
| 130 | 4 | 0        | 0.035714 | 0.080357 | 0.866071 | 0.017857 | 0.063636 | 0.058182 | 0.234545 | 0.578182 | 0.065455 |

---

---

|     |   |          |          |          |          |          |          |          |          |          |          |
|-----|---|----------|----------|----------|----------|----------|----------|----------|----------|----------|----------|
| 118 | 4 | 0.028302 | 0.084906 | 0.113208 | 0.754717 | 0.018868 | 0.131579 | 0.145614 | 0.15614  | 0.526316 | 0.040351 |
| 148 | 4 | 0.028571 | 0.047619 | 0.057143 | 0.733333 | 0.133333 | 0.082061 | 0.026718 | 0.166031 | 0.498092 | 0.227099 |
| 134 | 4 | 0.040404 | 0.131313 | 0.151515 | 0.181818 | 0.494949 | 0.085657 | 0.071713 | 0.145418 | 0.589641 | 0.10757  |
| 141 | 4 | 0.016393 | 0.057377 | 0.172131 | 0.598361 | 0.155738 | 0.112186 | 0.079304 | 0.237911 | 0.516441 | 0.054159 |
| 136 | 4 | 0.05     | 0.11     | 0.23     | 0.31     | 0.3      | 0.051786 | 0.0375   | 0.130357 | 0.7375   | 0.042857 |
| 154 | 4 | 0.047619 | 0.057143 | 0.257143 | 0.590476 | 0.047619 | 0.201117 | 0.173184 | 0.176909 | 0.350093 | 0.098696 |
| 129 | 4 | 0.017857 | 0.044643 | 0        | 0.919643 | 0.017857 | 0.080645 | 0.102151 | 0.16129  | 0.455197 | 0.200717 |
| 192 | 5 | 0.115702 | 0.256198 | 0.165289 | 0.140496 | 0.322314 | 0.225379 | 0.058712 | 0.05303  | 0.041667 | 0.621212 |
| 171 | 5 | 0.045872 | 0.045872 | 0.137615 | 0.376147 | 0.394495 | 0.09073  | 0.019724 | 0.084813 | 0.128205 | 0.676529 |
| 169 | 5 | 0.293578 | 0.082569 | 0.137615 | 0.165138 | 0.321101 | 0.17658  | 0.111524 | 0.091078 | 0.289963 | 0.330855 |
| 162 | 5 | 0.009259 | 0.055556 | 0.055556 | 0.12037  | 0.759259 | 0.041825 | 0.015209 | 0.18251  | 0.165399 | 0.595057 |
| 182 | 5 | 0.142857 | 0.142857 | 0.085714 | 0.057143 | 0.571429 | 0.636711 | 0.042065 | 0.036329 | 0.022945 | 0.26195  |
| 190 | 5 | 0.156863 | 0.186275 | 0.107843 | 0.098039 | 0.45098  | 0.274908 | 0.173432 | 0.197417 | 0.053506 | 0.300738 |
| 167 | 5 | 0.405172 | 0.051724 | 0.077586 | 0.025862 | 0.439655 | 0.215953 | 0.011673 | 0.038911 | 0.046693 | 0.68677  |
| 178 | 5 | 0.25     | 0.12963  | 0.222222 | 0.092593 | 0.305556 | 0.132379 | 0.042934 | 0.078712 | 0.046512 | 0.699463 |
| 196 | 5 | 0.223214 | 0.116071 | 0.107143 | 0.160714 | 0.392857 | 0.433892 | 0.029795 | 0.080074 | 0.011173 | 0.445065 |
| 165 | 5 | 0.030303 | 0.030303 | 0.111111 | 0.121212 | 0.707071 | 0.210238 | 0.025594 | 0.060329 | 0.122486 | 0.581353 |
| 187 | 5 | 0.093458 | 0.140187 | 0.102804 | 0.121495 | 0.542056 | 0.250951 | 0.068441 | 0.153992 | 0.106464 | 0.420152 |
| 191 | 5 | 0.31068  | 0.145631 | 0.145631 | 0.165049 | 0.23301  | 0.357782 | 0.060823 | 0.087657 | 0.025045 | 0.468694 |
| 184 | 5 | 0.405405 | 0.126126 | 0.045045 | 0.018018 | 0.405405 | 0.251786 | 0.098214 | 0.133929 | 0.064286 | 0.451786 |
| 161 | 5 | 0.063063 | 0.072072 | 0.162162 | 0.18018  | 0.522523 | 0.098485 | 0.005682 | 0.140152 | 0.143939 | 0.611742 |
| 180 | 5 | 0.211009 | 0.348624 | 0.211009 | 0.036697 | 0.192661 | 0.325967 | 0.053407 | 0.053407 | 0.029466 | 0.537753 |
| 175 | 5 | 0.181818 | 0.050505 | 0.040404 | 0.090909 | 0.636364 | 0.114603 | 0.011091 | 0.075786 | 0.072089 | 0.726433 |
| 179 | 5 | 0.252632 | 0.084211 | 0.073684 | 0.052632 | 0.536842 | 0.194831 | 0.049702 | 0.111332 | 0.065606 | 0.578529 |
| 168 | 5 | 0.054054 | 0.036036 | 0.153153 | 0.117117 | 0.63964  | 0.258755 | 0.149805 | 0.070039 | 0.249027 | 0.272374 |
| 189 | 5 | 0.158879 | 0.130841 | 0.028037 | 0.037383 | 0.64486  | 0.499112 | 0.058615 | 0.101243 | 0.0373   | 0.30373  |
| 173 | 5 | 0.070796 | 0.053097 | 0.044248 | 0.061947 | 0.769912 | 0.152047 | 0.021442 | 0.074074 | 0.19883  | 0.553606 |
| 194 | 5 | 0.017391 | 0.286957 | 0.086957 | 0.226087 | 0.382609 | 0.089552 | 0.037313 | 0.106343 | 0.080224 | 0.686567 |
| 195 | 5 | 0.042735 | 0.239316 | 0.068376 | 0.136752 | 0.512821 | 0.179775 | 0.041199 | 0.052434 | 0.061798 | 0.664794 |
| 170 | 5 | 0.027778 | 0.064815 | 0.12963  | 0.175926 | 0.601852 | 0.109562 | 0.02988  | 0.11753  | 0.35259  | 0.390438 |
| 174 | 5 | 0.078431 | 0.107843 | 0.078431 | 0.156863 | 0.578431 | 0.092764 | 0.012987 | 0.048237 | 0.027829 | 0.818182 |
| 163 | 5 | 0.048077 | 0.048077 | 0.057692 | 0.057692 | 0.788462 | 0.096386 | 0.004016 | 0.054217 | 0.13253  | 0.712851 |
| 181 | 5 | 0.083333 | 0.212963 | 0.185185 | 0.055556 | 0.462963 | 0.246777 | 0.053407 | 0.066298 | 0.106814 | 0.526703 |

---

Table S7

| Sample number | Class label | FT-MIR-RFE tree votes (Validation set) |          |          |          |          | NIR-RFE tree votes (Validation set) |          |          |          |          |
|---------------|-------------|----------------------------------------|----------|----------|----------|----------|-------------------------------------|----------|----------|----------|----------|
|               |             | Class 1                                | Class 2  | Class 3  | Class 4  | Class 5  | Class 1                             | Class 2  | Class 3  | Class 4  | Class 5  |
| 4             | 1           | 0.587031                               | 0.068259 | 0.273038 | 0.054608 | 0.017065 | 0.196699                            | 0.228336 | 0.335626 | 0.21458  | 0.024759 |
| 6             | 1           | 0.293515                               | 0.331058 | 0.146758 | 0.09215  | 0.136519 | 0.178129                            | 0.083906 | 0.19326  | 0.484182 | 0.060523 |
| 8             | 1           | 0.457338                               | 0.177474 | 0.116041 | 0.085324 | 0.163823 | 0.576341                            | 0.07359  | 0.094911 | 0.041265 | 0.213893 |
| 10            | 1           | 0.853242                               | 0.068259 | 0.027304 | 0.020478 | 0.030717 | 0.470426                            | 0.02751  | 0.107978 | 0.028886 | 0.365199 |
| 13            | 1           | 0.450512                               | 0.098976 | 0.133106 | 0.112628 | 0.204778 | 0.232462                            | 0.264099 | 0.137552 | 0.322558 | 0.043329 |
| 15            | 1           | 0.109215                               | 0.150171 | 0.52901  | 0.163823 | 0.047782 | 0.158872                            | 0.162999 | 0.317056 | 0.277854 | 0.083219 |
| 22            | 1           | 0.327645                               | 0.064846 | 0.047782 | 0.071672 | 0.488055 | 0.261348                            | 0.132737 | 0.218707 | 0.249656 | 0.137552 |
| 24            | 1           | 0.539249                               | 0.081911 | 0.040956 | 0.098976 | 0.238908 | 0.3989                              | 0.059835 | 0.099037 | 0.232462 | 0.209766 |
| 28            | 1           | 0.737201                               | 0.061433 | 0.071672 | 0.044369 | 0.085324 | 0.641678                            | 0.053645 | 0.136176 | 0.068088 | 0.100413 |
| 30            | 1           | 0.723549                               | 0.044369 | 0.030717 | 0.054608 | 0.146758 | 0.48762                             | 0.055021 | 0.089409 | 0.076341 | 0.291609 |
| 32            | 1           | 0.324232                               | 0.054608 | 0.16041  | 0.044369 | 0.416382 | 0.41403                             | 0.041265 | 0.068776 | 0.112792 | 0.363136 |
| 34            | 1           | 0.426621                               | 0.102389 | 0.09215  | 0.143345 | 0.235495 | 0.542641                            | 0.033012 | 0.174691 | 0.038514 | 0.211142 |
| 35            | 1           | 0.453925                               | 0.047782 | 0.167235 | 0.112628 | 0.21843  | 0.563274                            | 0.024759 | 0.041265 | 0.108666 | 0.262036 |
| 37            | 1           | 0.590444                               | 0.116041 | 0.071672 | 0.040956 | 0.180887 | 0.624484                            | 0.0337   | 0.063961 | 0.029574 | 0.248281 |
| 42            | 2           | 0.105802                               | 0.273038 | 0.286689 | 0.191126 | 0.143345 | 0.257221                            | 0.310179 | 0.255158 | 0.14099  | 0.036451 |
| 43            | 2           | 0.061433                               | 0.296928 | 0.313993 | 0.21843  | 0.109215 | 0.197387                            | 0.321871 | 0.143054 | 0.277166 | 0.060523 |
| 46            | 2           | 0.030717                               | 0.631399 | 0.180887 | 0.081911 | 0.075085 | 0.111417                            | 0.218019 | 0.118294 | 0.474553 | 0.077717 |
| 49            | 2           | 0.054608                               | 0.832765 | 0.061433 | 0.013652 | 0.037543 | 0.121045                            | 0.600413 | 0.141678 | 0.072215 | 0.064649 |
| 52            | 2           | 0.020478                               | 0.726962 | 0.116041 | 0.05802  | 0.078498 | 0.151994                            | 0.387208 | 0.261348 | 0.126547 | 0.072902 |
| 58            | 2           | 0.098976                               | 0.573379 | 0.064846 | 0.116041 | 0.146758 | 0.100413                            | 0.396149 | 0.160935 | 0.321871 | 0.020633 |
| 60            | 2           | 0.027304                               | 0.778157 | 0.112628 | 0.030717 | 0.051195 | 0.03989                             | 0.860385 | 0.063274 | 0.022696 | 0.013755 |
| 65            | 2           | 0.010239                               | 0.849829 | 0.088737 | 0.023891 | 0.027304 | 0.094911                            | 0.657497 | 0.101788 | 0.11967  | 0.026135 |
| 67            | 2           | 0.020478                               | 0.805461 | 0.078498 | 0.085324 | 0.010239 | 0.110041                            | 0.590096 | 0.182944 | 0.060523 | 0.056396 |
| 69            | 2           | 0.023891                               | 0.723549 | 0.136519 | 0.081911 | 0.03413  | 0.124484                            | 0.562586 | 0.22077  | 0.059147 | 0.033012 |
| 71            | 2           | 0.040956                               | 0.750853 | 0.088737 | 0.023891 | 0.095563 | 0.128611                            | 0.724209 | 0.06121  | 0.042641 | 0.043329 |
| 73            | 2           | 0.054608                               | 0.587031 | 0.1843   | 0.112628 | 0.061433 | 0.156809                            | 0.570839 | 0.123109 | 0.122421 | 0.026823 |
| 78            | 2           | 0.020478                               | 0.706485 | 0.139932 | 0.047782 | 0.085324 | 0.093535                            | 0.727648 | 0.123796 | 0.026823 | 0.028198 |
| 80            | 2           | 0.020478                               | 0.464164 | 0.249147 | 0.170648 | 0.095563 | 0.151994                            | 0.555708 | 0.122421 | 0.06121  | 0.108666 |
| 82            | 3           | 0.102389                               | 0.05802  | 0.750853 | 0.03413  | 0.054608 | 0.176754                            | 0.313618 | 0.325309 | 0.156121 | 0.028198 |
| 84            | 3           | 0.064846                               | 0.167235 | 0.610922 | 0.102389 | 0.054608 | 0.227648                            | 0.175378 | 0.36795  | 0.14718  | 0.081843 |
| 86            | 3           | 0.109215                               | 0.064846 | 0.648464 | 0.109215 | 0.068259 | 0.234525                            | 0.216644 | 0.303301 | 0.105915 | 0.139615 |
| 88            | 3           | 0.013652                               | 0.204778 | 0.47099  | 0.194539 | 0.116041 | 0.074966                            | 0.088033 | 0.275103 | 0.491059 | 0.070839 |
| 89            | 3           | 0.030717                               | 0.156997 | 0.477816 | 0.225256 | 0.109215 | 0.083906                            | 0.060523 | 0.271664 | 0.470426 | 0.11348  |
| 92            | 3           | 0.078498                               | 0.16041  | 0.658703 | 0.054608 | 0.047782 | 0.442916                            | 0.124484 | 0.136864 | 0.019945 | 0.275791 |
| 93            | 3           | 0.027304                               | 0.129693 | 0.74744  | 0.044369 | 0.051195 | 0.389959                            | 0.110041 | 0.232462 | 0.057084 | 0.210454 |
| 94            | 3           | 0.051195                               | 0.040956 | 0.723549 | 0.102389 | 0.081911 | 0.337689                            | 0.058459 | 0.202889 | 0.101788 | 0.299175 |
| 95            | 3           | 0.307167                               | 0.075085 | 0.501706 | 0.078498 | 0.037543 | 0.394773                            | 0.078404 | 0.186382 | 0.041265 | 0.299175 |
| 98            | 3           | 0.027304                               | 0.09215  | 0.447099 | 0.399317 | 0.03413  | 0.127923                            | 0.103164 | 0.330124 | 0.403026 | 0.035763 |
| 103           | 3           | 0.030717                               | 0.064846 | 0.549488 | 0.197952 | 0.156997 | 0.050894                            | 0.057772 | 0.372765 | 0.473865 | 0.044704 |
| 115           | 3           | 0.05802                                | 0.150171 | 0.682594 | 0.081911 | 0.027304 | 0.167125                            | 0.082531 | 0.493122 | 0.07359  | 0.183631 |
| 119           | 4           | 0.006826                               | 0.167235 | 0.061433 | 0.750853 | 0.013652 | 0.045392                            | 0.078404 | 0.152682 | 0.691197 | 0.032325 |
| 120           | 4           | 0.006826                               | 0.03413  | 0.047782 | 0.90785  | 0.003413 | 0.054333                            | 0.044017 | 0.084594 | 0.788171 | 0.028886 |
| 124           | 4           | 0.003413                               | 0.027304 | 0.010239 | 0.955631 | 0.003413 | 0.125172                            | 0.090096 | 0.103164 | 0.599037 | 0.082531 |
| 127           | 4           | 0.003413                               | 0.068259 | 0.051195 | 0.870307 | 0.006826 | 0.069464                            | 0.05227  | 0.15337  | 0.665062 | 0.059835 |
| 132           | 4           | 0.013652                               | 0.054608 | 0.03413  | 0.880546 | 0.017065 | 0.136176                            | 0.136176 | 0.104539 | 0.577717 | 0.045392 |
| 133           | 4           | 0                                      | 0.013652 | 0.030717 | 0.955631 | 0        | 0.044704                            | 0.050206 | 0.144429 | 0.743466 | 0.017194 |

---

|     |   |          |          |          |          |          |          |          |          |          |          |
|-----|---|----------|----------|----------|----------|----------|----------|----------|----------|----------|----------|
| 135 | 4 | 0.078498 | 0.064846 | 0.153584 | 0.327645 | 0.375427 | 0.151307 | 0.131362 | 0.091472 | 0.546768 | 0.079092 |
| 138 | 4 | 0.013652 | 0.03413  | 0.09215  | 0.559727 | 0.300341 | 0.049519 | 0.055708 | 0.157497 | 0.682944 | 0.054333 |
| 142 | 4 | 0.054608 | 0.071672 | 0.102389 | 0.474403 | 0.296928 | 0.0674   | 0.068776 | 0.29436  | 0.51238  | 0.057084 |
| 143 | 4 | 0.013652 | 0.05802  | 0.075085 | 0.713311 | 0.139932 | 0.061898 | 0.092847 | 0.093535 | 0.695323 | 0.056396 |
| 147 | 4 | 0.020478 | 0.020478 | 0.075085 | 0.8157   | 0.068259 | 0.100413 | 0.054333 | 0.223521 | 0.517194 | 0.104539 |
| 150 | 4 | 0.023891 | 0.023891 | 0.068259 | 0.771331 | 0.112628 | 0.094223 | 0.050894 | 0.20564  | 0.470426 | 0.178817 |
| 151 | 4 | 0.006826 | 0.027304 | 0.273038 | 0.583618 | 0.109215 | 0.189133 | 0.030949 | 0.118294 | 0.297111 | 0.364512 |
| 155 | 4 | 0.03413  | 0.037543 | 0.211604 | 0.686007 | 0.030717 | 0.272352 | 0.182944 | 0.096286 | 0.389959 | 0.058459 |
| 157 | 5 | 0.020478 | 0.12628  | 0.153584 | 0.204778 | 0.494881 | 0.058459 | 0.029574 | 0.271664 | 0.354195 | 0.286107 |
| 158 | 5 | 0.010239 | 0.044369 | 0.054608 | 0.098976 | 0.791809 | 0.072215 | 0.023384 | 0.149931 | 0.352132 | 0.402338 |
| 159 | 5 | 0.017065 | 0.020478 | 0.044369 | 0.119454 | 0.798635 | 0.066713 | 0.022008 | 0.18088  | 0.338377 | 0.392022 |
| 160 | 5 | 0.030717 | 0.030717 | 0.040956 | 0.102389 | 0.795222 | 0.068088 | 0.013755 | 0.128611 | 0.226272 | 0.563274 |
| 164 | 5 | 0.020478 | 0.03413  | 0.071672 | 0.105802 | 0.767918 | 0.15956  | 0.011692 | 0.041265 | 0.088721 | 0.698762 |
| 166 | 5 | 0.05802  | 0.006826 | 0.020478 | 0.047782 | 0.866894 | 0.096974 | 0.011692 | 0.049519 | 0.171252 | 0.670564 |
| 172 | 5 | 0.020478 | 0.071672 | 0.095563 | 0.167235 | 0.645051 | 0.074278 | 0.011004 | 0.106602 | 0.163686 | 0.644429 |
| 176 | 5 | 0.170648 | 0.071672 | 0.088737 | 0.136519 | 0.532423 | 0.089409 | 0.008941 | 0.02132  | 0.03989  | 0.84044  |
| 177 | 5 | 0.129693 | 0.136519 | 0.450512 | 0.05802  | 0.225256 | 0.295048 | 0.040578 | 0.136176 | 0.04608  | 0.482118 |
| 183 | 5 | 0.279863 | 0.023891 | 0.047782 | 0.020478 | 0.627986 | 0.281981 | 0.110729 | 0.098349 | 0.051582 | 0.457359 |
| 185 | 5 | 0.051195 | 0.156997 | 0.139932 | 0.12628  | 0.525597 | 0.206327 | 0.044704 | 0.077029 | 0.06121  | 0.610729 |
| 186 | 5 | 0.201365 | 0.143345 | 0.122867 | 0.047782 | 0.484642 | 0.296424 | 0.070839 | 0.083906 | 0.048831 | 0.5      |
| 188 | 5 | 0.051195 | 0.047782 | 0.102389 | 0.225256 | 0.573379 | 0.107978 | 0.034388 | 0.091472 | 0.104539 | 0.661623 |
| 193 | 5 | 0.023891 | 0.197952 | 0.03413  | 0.081911 | 0.662116 | 0.081843 | 0.025447 | 0.055708 | 0.07359  | 0.763411 |

---

Table S8

| Sample number | Class label | FT-MIR-RFE tree votes (Calibration set) |          |          |          |          | NIR-RFE tree votes (Calibration set) |          |          |          |          |
|---------------|-------------|-----------------------------------------|----------|----------|----------|----------|--------------------------------------|----------|----------|----------|----------|
|               |             | Class 1                                 | Class 2  | Class 3  | Class 4  | Class 5  | Class 1                              | Class 2  | Class 3  | Class 4  | Class 5  |
| 36            | 1           | 0.37357                                 | -0.01733 | 0.214296 | 0.149037 | 0.280423 | 0.664562                             | -0.09413 | -0.21009 | 0.508672 | 0.130982 |
| 33            | 1           | 0.99893                                 | 0.226294 | -0.14351 | -0.10054 | 0.018824 | 0.659185                             | 0.094052 | -0.1692  | 0.094146 | 0.321821 |
| 12            | 1           | 0.488894                                | 0.139241 | 0.283868 | 0.083371 | 0.004626 | 0.729267                             | 0.040594 | -0.20251 | 0.455871 | -0.02322 |
| 1             | 1           | 0.860409                                | -0.07937 | 0.001514 | 0.285996 | -0.06855 | 0.579864                             | -0.24267 | 0.150767 | 0.16643  | 0.345611 |
| 2             | 1           | 0.353264                                | 0.333248 | 0.044408 | 0.177192 | 0.091888 | 0.590685                             | -0.20181 | -0.02819 | 0.292453 | 0.346865 |
| 20            | 1           | 0.595524                                | -0.22427 | 0.333501 | -0.22102 | 0.516264 | 0.27581                              | 0.377358 | 0.113518 | 0.393474 | -0.16016 |
| 19            | 1           | 0.777141                                | -0.11877 | 0.46603  | -0.13905 | 0.014656 | 0.284103                             | 0.387504 | 0.083537 | 0.354553 | -0.1097  |
| 27            | 1           | 0.769404                                | 0.147239 | 0.013618 | 0.017654 | 0.052085 | 0.633232                             | 0.072581 | 0.027483 | -0.00324 | 0.269941 |
| 16            | 1           | 0.191435                                | -0.20082 | 0.335811 | -0.15524 | 0.828811 | 0.082116                             | 0.221942 | 0.389894 | 0.39699  | -0.09094 |
| 31            | 1           | 0.510965                                | 0.217858 | 0.001777 | 0.211471 | 0.057929 | 0.595898                             | 0.05993  | -0.3199  | 0.357943 | 0.306128 |
| 3             | 1           | 0.843273                                | -0.04998 | 0.05138  | 0.04614  | 0.109191 | 0.670298                             | 0.122116 | -0.09285 | 0.046332 | 0.254103 |
| 18            | 1           | 0.774367                                | -0.09972 | 0.199454 | -0.08389 | 0.209795 | 0.347515                             | 0.175249 | 0.486316 | 0.141989 | -0.15107 |
| 9             | 1           | 0.729525                                | 0.073807 | 0.182592 | 0.031967 | -0.01789 | 0.560541                             | 5+J3:J2  | 0.223108 | 0.006353 | 0.260917 |
| 26            | 1           | 0.871553                                | 0.045883 | 0.202423 | -0.06731 | -0.05255 | 0.684738                             | 0.139071 | -0.00274 | 0.128798 | 0.05013  |
| 25            | 1           | 0.33872                                 | 0.17975  | 0.062187 | 0.191195 | 0.228147 | 0.76954                              | -0.17285 | 0.048643 | 0.343005 | 0.011662 |
| 23            | 1           | 0.484014                                | 0.281393 | -0.09062 | 0.259072 | 0.066144 | 0.441507                             | 0.162575 | -0.08717 | 0.254079 | 0.229008 |
| 38            | 1           | 0.552461                                | 0.240308 | 0.176762 | 0.211248 | -0.18078 | 0.657873                             | 0.11294  | 0.088815 | 0.045673 | 0.094698 |
| 14            | 1           | 0.763226                                | -0.43843 | 0.215265 | 0.236523 | 0.22341  | 0.22428                              | 0.208583 | 0.345694 | 0.420301 | -0.19886 |
| 40            | 1           | 0.345224                                | 0.267593 | 0.345265 | 0.0905   | -0.04858 | 0.354194                             | 0.079069 | 0.186627 | -0.019   | 0.399105 |
| 5             | 1           | 0.647073                                | 0.269697 | 0.099627 | 0.015395 | -0.03179 | 0.435287                             | -0.05749 | 0.18733  | 0.427895 | 0.006981 |
| 29            | 1           | 0.714511                                | 0.238573 | -0.05944 | 0.172083 | -0.06573 | 0.761177                             | -0.06808 | 0.102641 | 0.180242 | 0.024021 |
| 39            | 1           | 0.57843                                 | 0.00016  | 0.256936 | 0.122583 | 0.041891 | 0.668413                             | 0.025139 | -0.07614 | 0.331133 | 0.051455 |
| 17            | 1           | 0.263631                                | -0.22461 | 0.336639 | 0.089977 | 0.534365 | 0.303924                             | 0.37467  | 0.120411 | 0.104686 | 0.096309 |
| 7             | 1           | 0.667289                                | 0.179909 | 0.227811 | 0.026981 | -0.10199 | 0.508352                             | -0.08972 | 0.327374 | 0.208868 | 0.045126 |
| 21            | 1           | 0.263536                                | 0.296558 | 0.17499  | 0.142245 | 0.122671 | 0.355958                             | -0.10643 | -0.23032 | 0.106194 | 0.8746   |
| 11            | 1           | 0.723453                                | 0.281044 | 0.048952 | 0.024766 | -0.07822 | 0.550154                             | -0.07246 | -0.08445 | 0.206589 | 0.400166 |
| 62            | 2           | 0.069806                                | 0.796336 | 0.332443 | -0.08412 | -0.11447 | -0.0309                              | 1.03785  | 0.241953 | -0.17347 | -0.07544 |
| 59            | 2           | 0.147833                                | 1.1561   | -0.24867 | 0.057173 | -0.11243 | -0.01725                             | 1.04545  | 0.019415 | 0.110953 | -0.15856 |
| 56            | 2           | -0.24548                                | 0.917336 | -0.26045 | 0.034118 | 0.554473 | -0.04646                             | 0.753504 | 0.018154 | 0.280089 | -0.00529 |
| 72            | 2           | 0.013535                                | 0.84695  | 0.057169 | 0.067689 | 0.014659 | 0.080162                             | 1.04596  | -0.34099 | 0.238562 | -0.02369 |
| 44            | 2           | -0.0405                                 | 0.6511   | 0.233068 | 0.117492 | 0.038844 | 0.137569                             | 0.473091 | 0.202538 | 0.043    | 0.143801 |
| 45            | 2           | 0.341618                                | 0.735057 | 0.07599  | 0.061759 | -0.21442 | 0.128847                             | 0.531111 | 0.187831 | 0.19593  | -0.04372 |
| 63            | 2           | -0.24319                                | 1.26425  | -0.22507 | -0.14048 | 0.344485 | -0.17847                             | 0.628842 | 0.112098 | 0.126205 | 0.311323 |
| 41            | 2           | 0.192673                                | 0.509964 | -0.04895 | 0.118889 | 0.22743  | 0.317974                             | 0.248314 | 0.050769 | 0.407933 | -0.02499 |
| 51            | 2           | 0.596993                                | 0.597665 | 0.113568 | 0.067675 | -0.3759  | 0.649795                             | 0.516496 | 0.068071 | 0.003744 | -0.23811 |
| 79            | 2           | 0.092682                                | 0.873614 | -0.34486 | 0.164715 | 0.213852 | 0.09538                              | 0.804192 | -0.34785 | 0.268529 | 0.179751 |
| 48            | 2           | 0.17912                                 | 0.557753 | 0.250903 | 0.048879 | -0.03665 | 0.257213                             | 0.411336 | -0.00043 | 0.257086 | 0.074794 |
| 76            | 2           | 0.258769                                | 0.500501 | 0.055079 | 0.167478 | 0.018174 | 0.207711                             | 0.794502 | 0.130637 | -0.15627 | 0.023419 |
| 68            | 2           | 0.358773                                | 0.38942  | 0.15305  | 0.134993 | -0.03624 | 0.229315                             | 0.356423 | 0.437791 | 0.111426 | -0.13496 |
| 55            | 2           | 0.186728                                | 0.604645 | 0.085441 | 0.074265 | 0.048921 | 0.242068                             | 0.557674 | 0.209597 | 0.076641 | -0.08598 |
| 61            | 2           | -0.37281                                | 0.772932 | 0.450286 | -0.00906 | 0.158659 | -0.11284                             | 0.746934 | 0.21529  | 0.255519 | -0.1049  |
| 74            | 2           | 0.329565                                | 0.62186  | 0.229073 | -0.05508 | -0.12541 | 0.08664                              | 0.940931 | 0.09133  | -0.20405 | 0.085147 |
| 70            | 2           | -0.24673                                | 0.816656 | 0.30424  | 0.160327 | -0.03449 | -0.22834                             | 0.68916  | -0.065   | 0.444426 | 0.159757 |
| 54            | 2           | 0.28297                                 | 0.509754 | 0.217188 | 0.016925 | -0.02684 | 0.204841                             | 0.640622 | 0.164782 | 0.119491 | -0.12974 |
| 66            | 2           | -0.19453                                | 1.26225  | 0.109375 | -0.329   | 0.151908 | -0.2715                              | 1.04902  | 0.079207 | -0.08073 | 0.223997 |

---

|     |   |          |          |          |          |          |          |          |          |          |          |
|-----|---|----------|----------|----------|----------|----------|----------|----------|----------|----------|----------|
| 64  | 2 | -0.09584 | 0.537856 | 0.499604 | 0.022184 | 0.0362   | -0.2319  | 0.596526 | 0.090629 | 0.432636 | 0.112107 |
| 57  | 2 | -0.07244 | 0.876781 | -0.08137 | 0.156307 | 0.120715 | -0.11396 | 0.76616  | 0.010082 | 0.21541  | 0.122306 |
| 75  | 2 | 0.039889 | 0.851868 | 0.012874 | 0.166448 | -0.07108 | 0.184991 | 0.911434 | 0.21267  | -0.17824 | -0.13086 |
| 47  | 2 | 0.153202 | 0.566339 | 0.307304 | 0.007739 | -0.03458 | 0.03282  | 0.472803 | 0.227146 | 0.150952 | 0.116278 |
| 77  | 2 | 0.201928 | 0.575064 | -0.00123 | 0.25134  | -0.0271  | -0.10929 | 0.79778  | 0.227295 | -0.16446 | 0.248666 |
| 53  | 2 | 0.072979 | 0.759376 | 0.1684   | -0.01323 | 0.012479 | 0.003281 | 0.600335 | 0.289205 | 0.108394 | -0.00121 |
| 50  | 2 | -0.04229 | 0.690368 | 0.223264 | -0.18263 | 0.311291 | -0.02089 | 0.336585 | 0.138437 | 0.313807 | 0.232064 |
| 101 | 3 | 0.518498 | -0.42517 | 0.488564 | 0.275332 | 0.142771 | 0.00779  | 0.155396 | 0.732153 | 0.054782 | 0.049879 |
| 91  | 3 | 0.311961 | 0.243343 | 0.416392 | -0.28897 | 0.317271 | 0.287735 | 0.416394 | 0.335789 | -0.24722 | 0.207303 |
| 90  | 3 | -0.05535 | -0.13039 | 0.47288  | 0.185251 | 0.527616 | -0.19887 | -0.05055 | 0.223964 | 0.442282 | 0.583168 |
| 87  | 3 | 0.49801  | -0.07593 | 0.287804 | 0.015506 | 0.274609 | 0.210897 | 0.310405 | 0.251664 | -0.02299 | 0.250023 |
| 99  | 3 | 0.148937 | 0.180723 | 0.679248 | 0.131564 | -0.14047 | -0.06287 | 0.426959 | 0.689509 | 0.180516 | -0.23411 |
| 114 | 3 | 0.242932 | 0.136059 | 0.83624  | -0.01202 | -0.20321 | 0.371691 | -0.12072 | 0.768564 | 0.000989 | -0.02052 |
| 116 | 3 | 0.15505  | 0.444771 | 0.894134 | 0.086516 | -0.58047 | 0.314057 | -0.02112 | 0.819186 | -0.1093  | -0.00282 |
| 102 | 3 | 0.130378 | 0.046267 | 0.357503 | 0.317604 | 0.148249 | -0.16631 | 0.147852 | 0.691012 | 0.06181  | 0.265637 |
| 104 | 3 | 0.296567 | 0.083874 | 0.690212 | -0.12148 | 0.050826 | -0.06158 | -0.08246 | 1.18766  | -0.19649 | 0.152871 |
| 83  | 3 | 0.443351 | 0.108669 | 0.516508 | -0.22135 | 0.152823 | 0.149471 | 0.31844  | 0.539185 | -0.06029 | 0.053191 |
| 110 | 3 | 0.088642 | 0.146678 | 0.617419 | 0.164083 | -0.01682 | 0.144773 | -0.08346 | 0.917945 | 0.167049 | -0.14631 |
| 108 | 3 | 0.398477 | 0.14524  | 0.539718 | -0.04363 | -0.03981 | 0.181061 | 0.069546 | 0.869504 | -0.07003 | -0.05008 |
| 81  | 3 | 0.232887 | 0.134995 | 0.289219 | 0.009594 | 0.333305 | -0.13159 | 0.393473 | 0.596458 | -0.04671 | 0.188369 |
| 107 | 3 | 0.265582 | -0.0708  | 0.655815 | 0.012989 | 0.136412 | 0.033563 | 0.055143 | 0.787277 | 0.153752 | -0.02973 |
| 112 | 3 | 0.037427 | 0.173097 | 0.793042 | 0.164842 | -0.16841 | 0.355083 | -0.24481 | 0.885204 | 0.159616 | -0.15509 |
| 113 | 3 | 0.035779 | 0.420523 | 1.08119  | -0.21221 | -0.32528 | 0.421198 | 0.055028 | 0.646507 | -0.00478 | -0.11795 |
| 97  | 3 | -0.1794  | -0.00048 | 0.665285 | 0.424461 | 0.090126 | -0.36052 | -0.14203 | 1.18333  | 0.688583 | -0.36936 |
| 85  | 3 | 0.213486 | -0.04318 | 0.530776 | 0.125265 | 0.173654 | -0.02251 | 0.257258 | 0.580134 | 0.143384 | 0.041736 |
| 109 | 3 | 0.066657 | 0.362102 | 0.304432 | -0.06219 | 0.329002 | 0.085945 | 0.004771 | 0.762973 | 0.026272 | 0.12004  |
| 105 | 3 | -0.14302 | 0.025219 | 0.810688 | 0.03887  | 0.26824  | -0.30469 | -0.03893 | 1.07937  | -0.06039 | 0.324637 |
| 100 | 3 | 0.021333 | 0.056647 | 0.485885 | 0.389877 | 0.046258 | -0.2839  | 0.387341 | 0.79778  | 0.157468 | -0.05869 |
| 111 | 3 | -0.18207 | 0.413202 | 0.697861 | 0.002914 | 0.068096 | 0.033835 | -0.05232 | 0.670692 | 0.164965 | 0.182824 |
| 96  | 3 | 0.338077 | 0.213843 | 0.415511 | -0.09889 | 0.131457 | 0.195256 | 0.541771 | 0.671002 | -0.26251 | -0.14552 |
| 106 | 3 | 0.097341 | 0.0784   | 0.565158 | 0.1564   | 0.102701 | 0.17908  | -0.03273 | 0.664721 | -0.00356 | 0.192487 |
| 152 | 4 | 0.220966 | 0.098181 | -0.04439 | 0.697809 | 0.027432 | 0.224681 | 0.238824 | 0.048087 | 0.389437 | 0.098971 |
| 121 | 4 | 0.08714  | 0.059315 | -0.02632 | 0.950082 | -0.07022 | 0.488248 | 0.197384 | -0.44574 | 1.03254  | -0.27243 |
| 125 | 4 | -0.13997 | 0.199927 | 0.04262  | 1.16397  | -0.26655 | -0.06456 | 0.110432 | 0.094822 | 0.607269 | 0.252037 |
| 128 | 4 | -0.12569 | -0.09038 | -0.11881 | 1.09464  | 0.240248 | 0.210784 | 0.155095 | -0.06024 | 0.532153 | 0.16221  |
| 145 | 4 | 0.159007 | -0.33164 | 0.517538 | 0.606769 | 0.048325 | 0.554847 | -0.17713 | 0.320438 | 0.449367 | -0.14753 |
| 156 | 4 | 0.266347 | 0.086221 | -0.08778 | 0.443714 | 0.291498 | 0.103228 | 0.331342 | -0.1165  | 0.588102 | 0.093824 |
| 126 | 4 | -0.12785 | 0.12853  | 0.021018 | 1.11711  | -0.13881 | 0.120524 | 0.116157 | -0.0147  | 0.507858 | 0.270161 |
| 131 | 4 | -0.00437 | 0.241123 | -0.1627  | 0.822945 | 0.103001 | 0.333078 | 0.1578   | -0.01491 | 0.548278 | -0.02424 |
| 117 | 4 | -0.21879 | -0.0586  | 0.540951 | 0.800981 | -0.06455 | 0.265847 | 0.228535 | -0.06963 | 0.870496 | -0.29525 |
| 122 | 4 | -0.15685 | -0.30607 | 0.321591 | 1.2125   | -0.07117 | 0.122396 | 0.252071 | -0.27698 | 1.00587  | -0.10336 |
| 149 | 4 | 0.372967 | -0.01622 | -0.1589  | 0.567867 | 0.234286 | 0.388376 | -0.02156 | 0.031784 | 0.331408 | 0.269988 |
| 153 | 4 | 0.191911 | -0.11024 | 0.25449  | 0.47051  | 0.193329 | 0.271237 | 0.241421 | 0.178268 | 0.378666 | -0.06959 |
| 146 | 4 | 0.045747 | -0.12237 | 0.07719  | 0.734304 | 0.265131 | 0.303604 | 0.014576 | 0.102926 | 0.370598 | 0.208295 |
| 123 | 4 | 0.066703 | 0.087618 | 0.10213  | 0.935766 | -0.19222 | 0.450782 | 0.09648  | 0.173474 | 0.391739 | -0.11248 |
| 139 | 4 | 0.290648 | -0.1555  | 0.132525 | 0.472654 | 0.259674 | 0.325629 | 0.095102 | 0.195467 | 0.491324 | -0.10752 |
| 140 | 4 | 0.117028 | 0.112366 | -0.02324 | 0.525901 | 0.267943 | 0.120667 | 0.105382 | 0.137568 | 0.489084 | 0.147299 |
| 137 | 4 | 0.248743 | 0.241418 | -0.12531 | 0.402048 | 0.233099 | 0.134088 | 0.080834 | 0.256859 | 0.463582 | 0.064637 |
| 144 | 4 | 0.373611 | 0.017219 | 0.052188 | 0.546546 | 0.010437 | 0.313355 | 0.108261 | 0.234356 | 0.280045 | 0.063982 |

---

---

|     |   |          |          |          |          |          |          |          |          |          |          |
|-----|---|----------|----------|----------|----------|----------|----------|----------|----------|----------|----------|
| 130 | 4 | -0.09667 | -0.05227 | 0.24525  | 0.989163 | -0.08547 | -0.03017 | 0.258285 | 0.22311  | 0.430382 | 0.11839  |
| 118 | 4 | 0.108706 | 0.060272 | 0.340164 | 0.779646 | -0.28879 | 0.243957 | 0.264101 | -0.056   | 0.821325 | -0.27338 |
| 148 | 4 | 0.094375 | 0.31175  | -0.31837 | 0.623393 | 0.288851 | 0.328862 | -0.10675 | -0.06688 | 0.603427 | 0.241342 |
| 134 | 4 | -0.09712 | 0.296689 | 0.070689 | 0.288835 | 0.44091  | 0.06538  | -0.05732 | 0.069886 | 0.741329 | 0.180729 |
| 141 | 4 | 0.088944 | 0.20967  | -0.10376 | 0.700544 | 0.104603 | 0.16625  | 0.049714 | 0.287238 | 0.485926 | 0.010872 |
| 136 | 4 | -0.01319 | 0.152442 | 0.332056 | 0.287453 | 0.241238 | 0.179078 | 0.135263 | -0.09566 | 0.741211 | 0.040104 |
| 154 | 4 | 0.053577 | 0.131038 | 0.076115 | 0.742344 | -0.00307 | 0.172235 | 0.198154 | 0.168072 | 0.299163 | 0.162376 |
| 129 | 4 | 0.012429 | -0.10771 | -0.51662 | 1.58926  | 0.022643 | 0.158029 | 0.131066 | 0.012082 | 0.571852 | 0.126971 |
| 192 | 5 | 0.045045 | 0.303987 | -0.17946 | 0.205694 | 0.624737 | 0.179493 | 0.126263 | 0.040185 | -0.13657 | 0.790627 |
| 171 | 5 | 0.153478 | -0.21874 | 0.002961 | 0.136928 | 0.92537  | 0.059048 | -0.13445 | 0.098703 | 0.226068 | 0.750636 |
| 169 | 5 | 0.15287  | 0.13835  | 0.178507 | 0.06857  | 0.461702 | 0.122156 | 0.182507 | -0.08442 | 0.318285 | 0.461474 |
| 162 | 5 | -0.06603 | -0.05353 | 0.200841 | 0.080202 | 0.838513 | 0.046101 | -0.24156 | 0.116314 | 0.314198 | 0.764942 |
| 182 | 5 | 0.297341 | 0.059631 | -0.1574  | 0.087702 | 0.712724 | 0.664539 | -0.03161 | -0.10775 | -0.06473 | 0.539545 |
| 190 | 5 | -0.17064 | -0.09406 | 0.21053  | 0.199505 | 0.854659 | 0.20375  | 0.41473  | -0.08457 | 0.044038 | 0.42205  |
| 167 | 5 | 0.452084 | -0.23449 | -0.14273 | 0.104806 | 0.820329 | 0.316709 | -0.23563 | 0.005872 | 0.17333  | 0.739717 |
| 178 | 5 | 0.335534 | 0.22599  | 0.02162  | -0.21056 | 0.627419 | -0.14606 | 0.347412 | 0.017567 | -0.24102 | 1.0221   |
| 196 | 5 | 0.168042 | 0.158922 | -0.14942 | 0.294051 | 0.528405 | 0.424239 | 0.029618 | 0.135316 | -0.20361 | 0.614433 |
| 165 | 5 | -0.11948 | -0.15932 | 0.355431 | 0.159255 | 0.76411  | 0.227291 | -0.24039 | 0.113361 | 0.141702 | 0.758036 |
| 187 | 5 | 0.194886 | -0.14891 | 0.055436 | 0.189407 | 0.709182 | 0.112164 | 0.37043  | -0.20634 | 0.029898 | 0.693847 |
| 191 | 5 | 0.430546 | 0.007665 | -0.15082 | 0.091715 | 0.620891 | 0.362537 | 0.158543 | -0.0398  | -0.13907 | 0.657789 |
| 184 | 5 | 0.403158 | 0.011261 | 0.027884 | -0.00828 | 0.565982 | -0.06412 | 0.457224 | -0.03099 | -0.20142 | 0.839297 |
| 161 | 5 | -0.01886 | 0.151263 | 0.051316 | 0.193404 | 0.622875 | 0.129296 | -0.30984 | 0.311127 | 0.120232 | 0.749185 |
| 180 | 5 | 0.104637 | 0.027924 | 0.273902 | -0.01173 | 0.605265 | 0.226382 | 0.093822 | 0.014425 | -0.04916 | 0.714534 |
| 175 | 5 | 0.216203 | -0.0196  | 0.148931 | -0.00108 | 0.655538 | -0.02863 | -0.18238 | 0.323509 | -0.07612 | 0.963621 |
| 179 | 5 | 0.304481 | 0.118747 | 0.109794 | -0.08797 | 0.554944 | -0.01717 | 0.223902 | 0.017837 | -0.13599 | 0.911419 |
| 168 | 5 | 0.040938 | -0.11786 | 0.329554 | -0.00804 | 0.755402 | 0.171429 | 0.131693 | 0.013188 | 0.25941  | 0.42428  |
| 189 | 5 | 0.105481 | 0.050192 | 0.013342 | 0.135355 | 0.695631 | 0.389466 | 0.071753 | 0.170491 | -0.07058 | 0.438871 |
| 173 | 5 | -0.00473 | 0.117622 | 0.154575 | -0.05023 | 0.782764 | 0.078415 | -0.32747 | 0.088968 | 0.4053   | 0.754784 |
| 194 | 5 | -0.09678 | 0.212325 | -0.08364 | 0.147566 | 0.820529 | -0.07875 | 0.035836 | 0.145433 | -0.06855 | 0.966034 |
| 195 | 5 | -0.28873 | 0.243065 | -0.03799 | 0.258926 | 0.824728 | -0.01556 | 0.128433 | 0.102436 | -0.1065  | 0.891189 |
| 170 | 5 | -0.06163 | 0.176812 | 0.192059 | 0.049122 | 0.643632 | 0.198648 | 0.06968  | -0.10539 | 0.348958 | 0.488106 |
| 174 | 5 | 0.204262 | 0.109093 | 0.071775 | 0.02702  | 0.587851 | 0.004053 | -0.14426 | 0.249046 | -0.12368 | 1.01483  |
| 163 | 5 | -0.08703 | -0.02133 | 0.138442 | 0.036027 | 0.933892 | 0.155561 | -0.13872 | -0.07477 | 0.29717  | 0.760757 |
| 181 | 5 | 0.059967 | -0.00256 | 0.183503 | 0.004424 | 0.754665 | 0.064694 | 0.020424 | 0.052214 | 0.044811 | 0.817858 |

---



Table S9

| Sample number | Class label | FT-MIR-RFE tree votes (Validation set) |          |          |          |          | NIR-RFE tree votes (Validation set) |          |          |          |          |
|---------------|-------------|----------------------------------------|----------|----------|----------|----------|-------------------------------------|----------|----------|----------|----------|
|               |             | Class 1                                | Class 2  | Class 3  | Class 4  | Class 5  | Class 1                             | Class 2  | Class 3  | Class 4  | Class 5  |
| 4             | 1           | 0.664506                               | 0.128447 | 0.116987 | 0.021988 | 0.068072 | 0.216662                            | 0.169155 | 0.427005 | 0.19068  | -0.0035  |
| 6             | 1           | 0.313492                               | 0.222769 | 0.260659 | 0.12851  | 0.07457  | 0.226077                            | 0.046091 | 0.23346  | 0.398275 | 0.096097 |
| 8             | 1           | 0.38049                                | 0.110032 | 0.259207 | 0.151489 | 0.098782 | 0.49334                             | 0.07748  | 0.055817 | 0.117655 | 0.255709 |
| 10            | 1           | 0.69926                                | 0.205132 | 0.061009 | 0.095527 | -0.06093 | 0.398066                            | -0.09554 | 0.159842 | 0.043586 | 0.494047 |
| 13            | 1           | 0.409535                               | 0.079527 | 0.428455 | 0.174025 | -0.09154 | 0.241067                            | 0.187019 | 0.301599 | 0.396407 | -0.12609 |
| 15            | 1           | 0.341456                               | 0.25769  | 0.282625 | 0.14334  | -0.02511 | -0.02017                            | 0.26035  | 0.539185 | 0.116776 | 0.103859 |
| 22            | 1           | 0.329123                               | 0.061803 | 0.095351 | 0.131135 | 0.382588 | 0.424796                            | 0.011341 | 0.134473 | 0.320124 | 0.109266 |
| 24            | 1           | 0.1811                                 | 0.084924 | 0.113224 | 0.296577 | 0.324176 | 0.43463                             | 0.139985 | -0.26904 | 0.400407 | 0.294019 |
| 28            | 1           | 0.700552                               | -0.09657 | 0.26453  | 0.024952 | 0.106532 | 0.685596                            | -0.1154  | 0.170949 | 0.259584 | -0.00073 |
| 30            | 1           | 0.587704                               | 0.001952 | 0.126473 | 0.075234 | 0.208637 | 0.448287                            | -0.02943 | 0.034928 | 0.22122  | 0.324997 |
| 32            | 1           | 0.376152                               | -0.18712 | 0.443266 | -0.14578 | 0.513477 | 0.560264                            | -0.08915 | -0.10673 | 0.390538 | 0.24508  |
| 34            | 1           | 0.860823                               | 0.002089 | 0.04134  | 0.206688 | -0.11094 | 0.67851                             | -0.00761 | 0.056025 | 0.132346 | 0.140732 |
| 35            | 1           | 0.547662                               | 0.007288 | 0.194805 | 0.028354 | 0.221891 | 0.696625                            | -0.16598 | -0.2043  | 0.472505 | 0.201155 |
| 37            | 1           | 0.229768                               | 0.190704 | 0.477647 | -0.09488 | 0.196756 | 0.717618                            | -0.11118 | 0.031367 | 0.152679 | 0.209511 |
| 42            | 2           | 0.143257                               | 0.557513 | 0.018446 | 0.206322 | 0.074463 | 0.299874                            | 0.258711 | 0.232912 | 0.271184 | -0.06268 |
| 43            | 2           | 0.115522                               | 0.518498 | 0.05211  | 0.40476  | -0.09089 | 0.097619                            | 0.141575 | 0.328192 | 0.238312 | 0.194302 |
| 46            | 2           | -0.07638                               | 0.664893 | 0.090504 | 0.137323 | 0.183661 | -0.05196                            | 0.21422  | 0.188733 | 0.358966 | 0.290038 |
| 49            | 2           | 0.149025                               | 0.638696 | 0.230456 | -0.10246 | 0.084281 | 0.04591                             | 0.482838 | 0.205045 | 0.008155 | 0.258052 |
| 52            | 2           | -0.04189                               | 0.730004 | 0.048387 | 0.06437  | 0.199128 | -0.10027                            | 0.470362 | 0.511243 | -0.01952 | 0.138186 |
| 58            | 2           | 0.023954                               | 0.685654 | 0.024424 | 0.236965 | 0.029003 | -0.00374                            | 0.493596 | 0.205947 | 0.388628 | -0.08443 |
| 60            | 2           | -0.09184                               | 0.813608 | 0.128369 | 0.146934 | 0.002934 | -0.01276                            | 0.894189 | 0.152878 | 0.012627 | -0.04693 |
| 65            | 2           | -0.09705                               | 1.05708  | 0.426178 | -0.38788 | 0.001677 | -0.09907                            | 0.843398 | -0.03692 | 0.304625 | -0.01203 |
| 67            | 2           | 0.02309                                | 0.507159 | 0.27836  | 0.198099 | -0.00671 | -0.02654                            | 0.731479 | 0.079219 | -0.01897 | 0.234816 |
| 69            | 2           | -0.0263                                | 0.440001 | 0.369211 | 0.172697 | 0.044391 | -0.0478                             | 0.726968 | 0.271192 | -0.01598 | 0.065617 |
| 71            | 2           | -0.11477                               | 1.08097  | -0.0274  | -0.25024 | 0.311435 | 0.168503                            | 1.01717  | -0.20949 | 0.069606 | -0.04579 |
| 73            | 2           | 0.058252                               | 0.56228  | 0.057355 | 0.331093 | -0.00898 | 0.060769                            | 0.641365 | 0.084975 | 0.300247 | -0.08736 |
| 78            | 2           | -0.0467                                | 0.718029 | 0.112186 | 0.127177 | 0.089304 | 0.049207                            | 0.717196 | 0.138627 | 0.06793  | 0.02704  |
| 80            | 2           | 0.081995                               | 0.482237 | 0.055704 | 0.377424 | 0.002639 | -0.17077                            | 0.627173 | 0.205489 | -0.06165 | 0.399762 |
| 82            | 3           | 0.291247                               | 0.011712 | 0.429501 | -0.09608 | 0.363618 | -0.07737                            | 0.304962 | 0.622671 | 0.078392 | 0.071344 |
| 84            | 3           | 0.17603                                | 0.117114 | 0.335909 | -0.0111  | 0.38205  | 0.004162                            | 0.290789 | 0.521412 | -0.08887 | 0.272505 |
| 86            | 3           | 0.357298                               | -0.05683 | 0.423914 | 0.034543 | 0.241077 | -0.01557                            | 0.323582 | 0.358749 | -0.0688  | 0.402037 |
| 88            | 3           | -0.07436                               | 0.101788 | 0.308392 | 0.127021 | 0.537155 | -0.08859                            | 0.219957 | 0.238422 | 0.288735 | 0.341474 |
| 89            | 3           | -0.07459                               | 0.111942 | 0.429719 | 0.018421 | 0.514504 | 0.066803                            | 0.029017 | 0.155554 | 0.381704 | 0.366922 |
| 92            | 3           | 0.363876                               | 0.075258 | 0.174348 | 0.214456 | 0.172061 | 0.298574                            | 0.362225 | -0.01545 | -0.03654 | 0.391191 |
| 93            | 3           | 0.313185                               | 0.190407 | 0.343635 | -0.01838 | 0.171156 | 0.340245                            | 0.22358  | 0.334547 | -0.10178 | 0.203406 |
| 94            | 3           | 0.128483                               | 0.016398 | 0.38236  | -0.00084 | 0.473602 | 0.209066                            | -0.12246 | 0.477604 | -0.00464 | 0.44043  |
| 95            | 3           | 0.274732                               | 0.162092 | 0.277976 | 0.042999 | 0.242201 | 0.386207                            | 0.170713 | 0.227607 | -0.15948 | 0.374956 |
| 98            | 3           | -0.05312                               | 0.374661 | 0.351852 | 0.507653 | -0.18105 | -0.20491                            | 0.300432 | 0.662512 | 0.274319 | -0.03235 |
| 103           | 3           | -0.07789                               | -0.17806 | 0.86465  | 0.227626 | 0.163677 | 0.030207                            | -0.06309 | 0.6594   | 0.484534 | -0.11105 |
| 115           | 3           | 0.072103                               | 0.351787 | 0.651214 | 0.152835 | -0.22794 | 0.183187                            | 0.101171 | 0.496455 | -0.04663 | 0.265821 |
| 119           | 4           | -0.16855                               | 0.306349 | 0.571546 | 0.880662 | -0.59001 | 0.235746                            | 0.18439  | -0.0167  | 0.696476 | -0.09992 |
| 120           | 4           | -0.1966                                | 0.33391  | 0.430473 | 0.687388 | -0.25517 | 0.258702                            | 0.023566 | -0.10318 | 0.937721 | -0.11681 |
| 124           | 4           | 0.113878                               | 0.052264 | -0.09245 | 1.08959  | -0.16328 | 0.397107                            | -0.08235 | -0.15264 | 0.785178 | 0.052702 |
| 127           | 4           | -0.162                                 | 0.403021 | 0.334774 | 0.874709 | -0.45051 | 0.146038                            | 0.117198 | 0.066928 | 0.511512 | 0.158324 |
| 132           | 4           | -0.01358                               | -0.11604 | -0.16514 | 1.29782  | -0.00306 | 0.261578                            | 0.185622 | -0.02312 | 0.61027  | -0.03435 |
| 133           | 4           | -0.10104                               | 0.126    | -0.00468 | 1.35143  | -0.37172 | 0.206509                            | 0.074889 | 0.202944 | 0.616301 | -0.10064 |

---

|     |   |          |          |          |          |          |          |          |          |          |          |
|-----|---|----------|----------|----------|----------|----------|----------|----------|----------|----------|----------|
| 135 | 4 | 0.065455 | 0.135884 | 0.148545 | 0.24372  | 0.406396 | 0.244207 | -0.0045  | 0.13046  | 0.571515 | 0.058318 |
| 138 | 4 | -0.10896 | -0.08749 | 0.076452 | 0.584002 | 0.535988 | 0.028701 | 0.13061  | 0.210994 | 0.502903 | 0.126792 |
| 142 | 4 | 0.217487 | -0.02954 | -0.03306 | 0.73536  | 0.109757 | 0.094348 | 0.145633 | 0.339305 | 0.338728 | 0.081986 |
| 143 | 4 | 0.036319 | 0.131616 | -0.01135 | 0.795497 | 0.047923 | 0.130718 | 0.184084 | -0.0075  | 0.49035  | 0.202344 |
| 147 | 4 | 0.090075 | 0.111291 | -0.07531 | 0.667232 | 0.206716 | 0.413356 | -0.04135 | 0.079797 | 0.491764 | 0.056434 |
| 150 | 4 | 0.23395  | -0.09598 | -0.05525 | 0.749494 | 0.167781 | 0.317346 | 0.098264 | -0.14276 | 0.529732 | 0.197418 |
| 151 | 4 | 0.122787 | -0.15813 | 0.258684 | 0.490809 | 0.285847 | 0.371648 | -0.10693 | -0.07376 | 0.396166 | 0.412874 |
| 155 | 4 | 0.108316 | -0.00215 | 0.047942 | 0.675427 | 0.170462 | 0.408456 | 0.147782 | -0.09558 | 0.548258 | -0.00891 |
| 157 | 5 | -0.10275 | 0.186372 | 0.111331 | 0.255158 | 0.549886 | -0.01501 | -0.19163 | 0.329509 | 0.402718 | 0.474411 |
| 158 | 5 | 0.003476 | 0.047506 | 0.181729 | -0.0134  | 0.780686 | 0.014924 | -0.09422 | 0.074015 | 0.375662 | 0.629621 |
| 159 | 5 | -0.12933 | -0.08012 | 0.182163 | 0.23118  | 0.796111 | 0.032458 | -0.08228 | 0.245162 | 0.265881 | 0.538776 |
| 160 | 5 | -0.02432 | 0.239534 | -0.01757 | -0.07819 | 0.880541 | 0.063869 | -0.08531 | 0.121458 | 0.278859 | 0.621126 |
| 164 | 5 | -0.01968 | 0.143177 | 0.113072 | 0.025733 | 0.737694 | 0.260038 | -0.24368 | 0.013723 | 0.213349 | 0.756574 |
| 166 | 5 | 0.205136 | -0.3314  | 0.069099 | 0.125318 | 0.931843 | 0.252922 | -0.19167 | -0.21591 | 0.527078 | 0.627581 |
| 172 | 5 | -0.10792 | 0.206324 | 0.243232 | 0.031233 | 0.627134 | 0.174585 | -0.10635 | -0.06271 | 0.290623 | 0.703858 |
| 176 | 5 | 0.206899 | -0.01467 | 0.275393 | 0.051155 | 0.481223 | 0.270145 | -0.29231 | 0.007889 | 0.104389 | 0.909883 |
| 177 | 5 | 0.249439 | 0.124314 | 0.213315 | -0.18131 | 0.594244 | -0.04355 | 0.187204 | 0.419938 | -0.39878 | 0.835188 |
| 183 | 5 | 0.254654 | -0.20523 | 0.318605 | -0.11214 | 0.744117 | 0.069709 | 0.36673  | 0.082023 | -0.13923 | 0.620767 |
| 185 | 5 | 0.002781 | -0.10391 | 0.155758 | 0.162124 | 0.783244 | -0.00998 | 0.160645 | 0.224436 | -0.06377 | 0.688673 |
| 186 | 5 | 0.05686  | 0.067207 | 0.093356 | 0.017576 | 0.765001 | 0.147734 | 0.153502 | 0.129139 | 0.011108 | 0.558517 |
| 188 | 5 | 0.04757  | -0.12341 | 0.128612 | 0.278915 | 0.66831  | -0.05361 | 0.154171 | 0.101309 | -0.02299 | 0.82112  |
| 193 | 5 | -0.06899 | 0.102048 | -0.27359 | 0.360997 | 0.879535 | -0.05629 | 0.15743  | 0.002371 | 0.002914 | 0.893578 |

---

Table S10

| Sample number | Class label | FT-MIR-Bo tree votes (Calibration set) |          |          |          |          | NIR-Bo tree votes (Calibration set) |          |          |          |          |
|---------------|-------------|----------------------------------------|----------|----------|----------|----------|-------------------------------------|----------|----------|----------|----------|
|               |             | Class 1                                | Class 2  | Class 3  | Class 4  | Class 5  | Class 1                             | Class 2  | Class 3  | Class 4  | Class 5  |
| 36            | 1           | 0.271739                               | 0.121739 | 0.15     | 0.147826 | 0.308696 | 0.394286                            | 0.077143 | 0.085714 | 0.151429 | 0.291429 |
| 33            | 1           | 0.783333                               | 0.05     | 0.090476 | 0.028571 | 0.047619 | 0.469453                            | 0.096463 | 0.057878 | 0.038585 | 0.337621 |
| 12            | 1           | 0.339853                               | 0.180929 | 0.283619 | 0.0978   | 0.0978   | 0.354098                            | 0.111475 | 0.15082  | 0.15082  | 0.232787 |
| 1             | 1           | 0.482843                               | 0.068627 | 0.196078 | 0.208333 | 0.044118 | 0.30303                             | 0.024242 | 0.060606 | 0.075758 | 0.536364 |
| 2             | 1           | 0.231308                               | 0.149533 | 0.296729 | 0.247664 | 0.074766 | 0.421725                            | 0.009585 | 0.044728 | 0.083067 | 0.440895 |
| 20            | 1           | 0.603248                               | 0.055684 | 0.074246 | 0.046404 | 0.220418 | 0.23125                             | 0.284375 | 0.165625 | 0.225    | 0.09375  |
| 19            | 1           | 0.606299                               | 0.07874  | 0.178478 | 0.060367 | 0.076115 | 0.216049                            | 0.395062 | 0.209877 | 0.154321 | 0.024691 |
| 27            | 1           | 0.942661                               | 0.020642 | 0.016055 | 0.006881 | 0.013761 | 0.303681                            | 0.147239 | 0.079755 | 0.070552 | 0.398773 |
| 16            | 1           | 0.406181                               | 0.050773 | 0.064018 | 0.099338 | 0.379691 | 0.21519                             | 0.151899 | 0.189873 | 0.420886 | 0.022152 |
| 31            | 1           | 0.308756                               | 0.290323 | 0.096774 | 0.115207 | 0.18894  | 0.432927                            | 0.054878 | 0.073171 | 0.060976 | 0.378049 |
| 3             | 1           | 0.579572                               | 0.090261 | 0.182898 | 0.078385 | 0.068884 | 0.44373                             | 0.138264 | 0.083601 | 0.057878 | 0.276527 |
| 18            | 1           | 0.788698                               | 0.056511 | 0.029484 | 0.031941 | 0.093366 | 0.24058                             | 0.327536 | 0.249275 | 0.13913  | 0.043478 |
| 9             | 1           | 0.783333                               | 0.069048 | 0.035714 | 0.05     | 0.061905 | 0.557377                            | 0.055738 | 0.140984 | 0.039344 | 0.206557 |
| 26            | 1           | 0.430288                               | 0.257212 | 0.127404 | 0.052885 | 0.132212 | 0.551205                            | 0.126506 | 0.135542 | 0.036145 | 0.150602 |
| 25            | 1           | 0.258993                               | 0.136691 | 0.141487 | 0.172662 | 0.290168 | 0.462264                            | 0.059748 | 0.147799 | 0.122642 | 0.207547 |
| 23            | 1           | 0.29397                                | 0.170854 | 0.10804  | 0.288945 | 0.138191 | 0.231844                            | 0.173184 | 0.187151 | 0.217877 | 0.189944 |
| 38            | 1           | 0.492857                               | 0.154762 | 0.097619 | 0.121429 | 0.133333 | 0.550633                            | 0.088608 | 0.117089 | 0.060127 | 0.183544 |
| 14            | 1           | 0.586797                               | 0.02934  | 0.09291  | 0.117359 | 0.173594 | 0.175953                            | 0.266862 | 0.199413 | 0.334311 | 0.02346  |
| 40            | 1           | 0.288136                               | 0.2954   | 0.16707  | 0.121065 | 0.128329 | 0.444795                            | 0.044164 | 0.116719 | 0.041009 | 0.353312 |
| 5             | 1           | 0.904328                               | 0.036446 | 0.038724 | 0.002278 | 0.018223 | 0.273927                            | 0.174917 | 0.125413 | 0.366337 | 0.059406 |
| 29            | 1           | 0.785888                               | 0.072993 | 0.058394 | 0.036496 | 0.046229 | 0.686335                            | 0.071429 | 0.059006 | 0.031056 | 0.152174 |
| 39            | 1           | 0.746445                               | 0.042654 | 0.059242 | 0.054502 | 0.097156 | 0.52                                | 0.153846 | 0.113846 | 0.061538 | 0.150769 |
| 17            | 1           | 0.422111                               | 0.050251 | 0.082915 | 0.123116 | 0.321608 | 0.250765                            | 0.351682 | 0.201835 | 0.12844  | 0.067278 |
| 7             | 1           | 0.679707                               | 0.09291  | 0.09291  | 0.046455 | 0.08802  | 0.454259                            | 0.164038 | 0.160883 | 0.135647 | 0.085174 |
| 21            | 1           | 0.193925                               | 0.13785  | 0.193925 | 0.280374 | 0.193925 | 0.164087                            | 0.027864 | 0.052632 | 0.099071 | 0.656347 |
| 11            | 1           | 0.835381                               | 0.063882 | 0.051597 | 0.029484 | 0.019656 | 0.51227                             | 0.021472 | 0.116564 | 0.110429 | 0.239264 |
| 62            | 2           | 0.050125                               | 0.493734 | 0.298246 | 0.105263 | 0.052632 | 0.056782                            | 0.766562 | 0.141956 | 0.031546 | 0.003155 |
| 59            | 2           | 0.22381                                | 0.338095 | 0.169048 | 0.092857 | 0.17619  | 0.123418                            | 0.655063 | 0.126582 | 0.06962  | 0.025316 |
| 56            | 2           | 0.137116                               | 0.392435 | 0.153664 | 0.092199 | 0.224586 | 0.177177                            | 0.576577 | 0.135135 | 0.084084 | 0.027027 |
| 72            | 2           | 0.042289                               | 0.58209  | 0.171642 | 0.077114 | 0.126866 | 0.220126                            | 0.518868 | 0.081761 | 0.122642 | 0.056604 |
| 44            | 2           | 0.044706                               | 0.416471 | 0.322353 | 0.112941 | 0.103529 | 0.151976                            | 0.534954 | 0.148936 | 0.066869 | 0.097264 |
| 45            | 2           | 0.209412                               | 0.322353 | 0.247059 | 0.105882 | 0.115294 | 0.159722                            | 0.482639 | 0.236111 | 0.100694 | 0.020833 |
| 63            | 2           | 0.044665                               | 0.424318 | 0.208437 | 0.230769 | 0.091811 | 0.137931                            | 0.545455 | 0.188088 | 0.087774 | 0.040752 |
| 41            | 2           | 0.1575                                 | 0.0675   | 0.1625   | 0.245    | 0.3675   | 0.186495                            | 0.122186 | 0.180064 | 0.469453 | 0.041801 |
| 51            | 2           | 0.362319                               | 0.379227 | 0.193237 | 0.021739 | 0.043478 | 0.363636                            | 0.38558  | 0.134796 | 0.025078 | 0.090909 |
| 79            | 2           | 0.07767                                | 0.43932  | 0.106796 | 0.058252 | 0.317961 | 0.145631                            | 0.763754 | 0.02589  | 0.048544 | 0.016181 |
| 48            | 2           | 0.105012                               | 0.546539 | 0.178998 | 0.052506 | 0.116945 | 0.204142                            | 0.535503 | 0.109467 | 0.115385 | 0.035503 |
| 76            | 2           | 0.096852                               | 0.610169 | 0.106538 | 0.050847 | 0.135593 | 0.169811                            | 0.606918 | 0.119497 | 0.056604 | 0.04717  |
| 68            | 2           | 0.192771                               | 0.20241  | 0.274699 | 0.260241 | 0.06988  | 0.191824                            | 0.41195  | 0.320755 | 0.053459 | 0.022013 |
| 55            | 2           | 0.235431                               | 0.414918 | 0.102564 | 0.090909 | 0.156177 | 0.152027                            | 0.516892 | 0.199324 | 0.094595 | 0.037162 |
| 61            | 2           | 0.020179                               | 0.428251 | 0.219731 | 0.278027 | 0.053812 | 0.104762                            | 0.374603 | 0.273016 | 0.209524 | 0.038095 |
| 74            | 2           | 0.272727                               | 0.433014 | 0.143541 | 0.033493 | 0.117225 | 0.110738                            | 0.684564 | 0.161074 | 0.016779 | 0.026846 |
| 70            | 2           | 0.00885                                | 0.471239 | 0.20354  | 0.245575 | 0.070796 | 0.110063                            | 0.374214 | 0.103774 | 0.374214 | 0.037736 |
| 54            | 2           | 0.278195                               | 0.338346 | 0.20802  | 0.100251 | 0.075188 | 0.234043                            | 0.531915 | 0.12462  | 0.045593 | 0.06383  |
| 66            | 2           | 0.01432                                | 0.761337 | 0.109785 | 0.042959 | 0.071599 | 0.072131                            | 0.57377  | 0.22623  | 0.085246 | 0.042623 |
| 64            | 2           | 0.025761                               | 0.555035 | 0.217799 | 0.145199 | 0.056206 | 0.155556                            | 0.219048 | 0.136508 | 0.450794 | 0.038095 |

---

|     |   |          |          |          |          |          |          |          |          |          |          |
|-----|---|----------|----------|----------|----------|----------|----------|----------|----------|----------|----------|
| 57  | 2 | 0.035    | 0.6825   | 0.095    | 0.065    | 0.1225   | 0.084746 | 0.59887  | 0.138418 | 0.161017 | 0.016949 |
| 75  | 2 | 0.070423 | 0.607981 | 0.096244 | 0.084507 | 0.140845 | 0.122449 | 0.664723 | 0.166181 | 0.011662 | 0.034985 |
| 47  | 2 | 0.115207 | 0.4447   | 0.290323 | 0.073733 | 0.076037 | 0.214953 | 0.489097 | 0.146417 | 0.102804 | 0.046729 |
| 77  | 2 | 0.081146 | 0.4821   | 0.116945 | 0.088305 | 0.231504 | 0.148607 | 0.452012 | 0.216718 | 0.117647 | 0.065015 |
| 53  | 2 | 0.151927 | 0.519274 | 0.124717 | 0.063492 | 0.14059  | 0.20059  | 0.374631 | 0.253687 | 0.112094 | 0.058997 |
| 50  | 2 | 0.027972 | 0.662005 | 0.177156 | 0.027972 | 0.104895 | 0.148515 | 0.237624 | 0.115512 | 0.389439 | 0.108911 |
| 101 | 3 | 0.195    | 0.1075   | 0.205    | 0.305    | 0.1875   | 0.06135  | 0.165644 | 0.546012 | 0.190184 | 0.03681  |
| 91  | 3 | 0.17713  | 0.201794 | 0.443946 | 0.056054 | 0.121076 | 0.33125  | 0.271875 | 0.140625 | 0.125    | 0.13125  |
| 90  | 3 | 0.028571 | 0.202381 | 0.302381 | 0.292857 | 0.17381  | 0.085627 | 0.055046 | 0.088685 | 0.504587 | 0.266055 |
| 87  | 3 | 0.286047 | 0.127907 | 0.427907 | 0.055814 | 0.102326 | 0.336634 | 0.231023 | 0.194719 | 0.09901  | 0.138614 |
| 99  | 3 | 0.135321 | 0.33945  | 0.376147 | 0.09633  | 0.052752 | 0.192429 | 0.451104 | 0.236593 | 0.113565 | 0.006309 |
| 114 | 3 | 0.064356 | 0.405941 | 0.35396  | 0.056931 | 0.118812 | 0.174917 | 0.072607 | 0.541254 | 0.089109 | 0.122112 |
| 116 | 3 | 0.081281 | 0.211823 | 0.455665 | 0.20936  | 0.041872 | 0.11465  | 0.079618 | 0.643312 | 0.063694 | 0.098726 |
| 102 | 3 | 0.066059 | 0.093394 | 0.296128 | 0.357631 | 0.186788 | 0.080997 | 0.158879 | 0.4081   | 0.320872 | 0.031153 |
| 104 | 3 | 0.273632 | 0.161692 | 0.380597 | 0.109453 | 0.074627 | 0.080386 | 0.041801 | 0.749196 | 0.099678 | 0.028939 |
| 83  | 3 | 0.266504 | 0.070905 | 0.484108 | 0.07824  | 0.100244 | 0.27     | 0.37     | 0.283333 | 0.06     | 0.016667 |
| 110 | 3 | 0.07732  | 0.237113 | 0.311856 | 0.185567 | 0.188144 | 0.053892 | 0.062874 | 0.640719 | 0.221557 | 0.020958 |
| 108 | 3 | 0.15     | 0.197619 | 0.188095 | 0.147619 | 0.316667 | 0.104101 | 0.07571  | 0.637224 | 0.107256 | 0.07571  |
| 81  | 3 | 0.066327 | 0.094388 | 0.543367 | 0.147959 | 0.147959 | 0.168605 | 0.293605 | 0.360465 | 0.113372 | 0.063953 |
| 107 | 3 | 0.12529  | 0.194896 | 0.366589 | 0.222738 | 0.090487 | 0.104895 | 0.125874 | 0.51049  | 0.206294 | 0.052448 |
| 112 | 3 | 0.030151 | 0.160804 | 0.51005  | 0.251256 | 0.047739 | 0.107843 | 0.01634  | 0.578431 | 0.169935 | 0.127451 |
| 113 | 3 | 0.067757 | 0.278037 | 0.567757 | 0.051402 | 0.035047 | 0.29878  | 0.094512 | 0.439024 | 0.07622  | 0.091463 |
| 97  | 3 | 0.018648 | 0.097902 | 0.317016 | 0.475524 | 0.090909 | 0.124242 | 0.093939 | 0.19697  | 0.533333 | 0.051515 |
| 85  | 3 | 0.03423  | 0.180929 | 0.550122 | 0.151589 | 0.08313  | 0.28882  | 0.31677  | 0.204969 | 0.161491 | 0.02795  |
| 109 | 3 | 0.19426  | 0.19426  | 0.181015 | 0.18543  | 0.245033 | 0.140299 | 0.056716 | 0.573134 | 0.137313 | 0.092537 |
| 105 | 3 | 0.00232  | 0.099768 | 0.470998 | 0.238979 | 0.187935 | 0.041812 | 0.052265 | 0.574913 | 0.264808 | 0.066202 |
| 100 | 3 | 0.053528 | 0.107056 | 0.391727 | 0.347932 | 0.099757 | 0.12963  | 0.194444 | 0.25     | 0.404321 | 0.021605 |
| 111 | 3 | 0.043902 | 0.131707 | 0.497561 | 0.243902 | 0.082927 | 0.060606 | 0.036364 | 0.5      | 0.354545 | 0.048485 |
| 96  | 3 | 0.147619 | 0.416667 | 0.328571 | 0.028571 | 0.078571 | 0.175926 | 0.509259 | 0.228395 | 0.064815 | 0.021605 |
| 106 | 3 | 0.139706 | 0.159314 | 0.404412 | 0.191176 | 0.105392 | 0.305994 | 0.091483 | 0.208202 | 0.11041  | 0.283912 |
| 152 | 4 | 0.147059 | 0.198529 | 0.394608 | 0.147059 | 0.112745 | 0.219436 | 0.297806 | 0.159875 | 0.294671 | 0.028213 |
| 121 | 4 | 0.132678 | 0.036855 | 0.100737 | 0.673219 | 0.056511 | 0.080745 | 0.142857 | 0.040373 | 0.708075 | 0.02795  |
| 125 | 4 | 0.009324 | 0.107226 | 0.100233 | 0.7669   | 0.016317 | 0.02994  | 0.05988  | 0.191617 | 0.640719 | 0.077844 |
| 128 | 4 | 0.016355 | 0.067757 | 0.119159 | 0.757009 | 0.03972  | 0.085106 | 0.051672 | 0.18541  | 0.607903 | 0.069909 |
| 145 | 4 | 0.221662 | 0.073048 | 0.279597 | 0.34005  | 0.085642 | 0.313333 | 0.166667 | 0.213333 | 0.153333 | 0.153333 |
| 156 | 4 | 0.095122 | 0.112195 | 0.282927 | 0.373171 | 0.136585 | 0.194969 | 0.210692 | 0.141509 | 0.380503 | 0.072327 |
| 126 | 4 | 0.015982 | 0.114155 | 0.118721 | 0.726027 | 0.025114 | 0.210169 | 0.237288 | 0.084746 | 0.325424 | 0.142373 |
| 131 | 4 | 0.037879 | 0.146465 | 0.133838 | 0.636364 | 0.045455 | 0.267516 | 0.289809 | 0.066879 | 0.318471 | 0.057325 |
| 117 | 4 | 0.012407 | 0.042184 | 0.091811 | 0.826303 | 0.027295 | 0.042553 | 0.097264 | 0.133739 | 0.714286 | 0.012158 |
| 122 | 4 | 0.029197 | 0.097324 | 0.097324 | 0.712895 | 0.06326  | 0.081169 | 0.136364 | 0.038961 | 0.701299 | 0.042208 |
| 149 | 4 | 0.121951 | 0.090909 | 0.124169 | 0.27051  | 0.392461 | 0.180685 | 0.062305 | 0.218069 | 0.286604 | 0.252336 |
| 153 | 4 | 0.204651 | 0.095349 | 0.248837 | 0.316279 | 0.134884 | 0.159509 | 0.153374 | 0.303681 | 0.312883 | 0.070552 |
| 146 | 4 | 0.062972 | 0.025189 | 0.105793 | 0.609572 | 0.196474 | 0.272727 | 0.059441 | 0.132867 | 0.388112 | 0.146853 |
| 123 | 4 | 0.056511 | 0.078624 | 0.125307 | 0.707617 | 0.031941 | 0.276316 | 0.220395 | 0.213816 | 0.171053 | 0.118421 |
| 139 | 4 | 0.220183 | 0.06422  | 0.222477 | 0.341743 | 0.151376 | 0.143713 | 0.140719 | 0.224551 | 0.461078 | 0.02994  |
| 140 | 4 | 0.092417 | 0.151659 | 0.104265 | 0.265403 | 0.386256 | 0.036066 | 0.055738 | 0.190164 | 0.695082 | 0.022951 |
| 137 | 4 | 0.139089 | 0.088729 | 0.227818 | 0.28777  | 0.256595 | 0.10241  | 0.072289 | 0.225904 | 0.542169 | 0.057229 |
| 144 | 4 | 0.469907 | 0.099537 | 0.134259 | 0.108796 | 0.1875   | 0.223565 | 0.145015 | 0.287009 | 0.287009 | 0.057402 |
| 130 | 4 | 0.00489  | 0.02934  | 0.08313  | 0.872861 | 0.00978  | 0.070513 | 0.073718 | 0.163462 | 0.647436 | 0.044872 |

---

---

|     |   |          |          |          |          |          |          |          |          |          |          |
|-----|---|----------|----------|----------|----------|----------|----------|----------|----------|----------|----------|
| 118 | 4 | 0.021378 | 0.092637 | 0.102138 | 0.755344 | 0.028504 | 0.123711 | 0.147766 | 0.161512 | 0.542955 | 0.024055 |
| 148 | 4 | 0.039702 | 0.064516 | 0.1067   | 0.60794  | 0.181141 | 0.096667 | 0.033333 | 0.116667 | 0.536667 | 0.216667 |
| 134 | 4 | 0.037037 | 0.164352 | 0.106481 | 0.19213  | 0.5      | 0.074627 | 0.047761 | 0.131343 | 0.653731 | 0.092537 |
| 141 | 4 | 0.034398 | 0.095823 | 0.201474 | 0.4914   | 0.176904 | 0.098101 | 0.088608 | 0.287975 | 0.462025 | 0.063291 |
| 136 | 4 | 0.060526 | 0.136842 | 0.242105 | 0.326316 | 0.234211 | 0.065672 | 0.026866 | 0.155224 | 0.707463 | 0.044776 |
| 154 | 4 | 0.034247 | 0.107306 | 0.296804 | 0.525114 | 0.03653  | 0.171429 | 0.22     | 0.22     | 0.322857 | 0.065714 |
| 129 | 4 | 0.018018 | 0.022523 | 0.047297 | 0.896396 | 0.015766 | 0.12844  | 0.04893  | 0.094801 | 0.562691 | 0.165138 |
| 192 | 5 | 0.086449 | 0.252336 | 0.151869 | 0.224299 | 0.285047 | 0.238411 | 0.059603 | 0.049669 | 0.023179 | 0.629139 |
| 171 | 5 | 0.064073 | 0.048055 | 0.139588 | 0.267735 | 0.480549 | 0.087662 | 0.016234 | 0.068182 | 0.11039  | 0.717532 |
| 169 | 5 | 0.189394 | 0.118687 | 0.219697 | 0.156566 | 0.315657 | 0.2125   | 0.109375 | 0.109375 | 0.24375  | 0.325    |
| 162 | 5 | 0.026379 | 0.035971 | 0.086331 | 0.136691 | 0.714628 | 0.049231 | 0.021538 | 0.129231 | 0.16     | 0.64     |
| 182 | 5 | 0.24     | 0.1825   | 0.1025   | 0.0675   | 0.4075   | 0.657224 | 0.033994 | 0.045326 | 0.022663 | 0.240793 |
| 190 | 5 | 0.091566 | 0.277108 | 0.113253 | 0.115663 | 0.40241  | 0.268786 | 0.193642 | 0.231214 | 0.078035 | 0.228324 |
| 167 | 5 | 0.379653 | 0.062035 | 0.064516 | 0.101737 | 0.39206  | 0.265625 | 0.021875 | 0.040625 | 0.04375  | 0.628125 |
| 178 | 5 | 0.181818 | 0.137592 | 0.228501 | 0.12285  | 0.329238 | 0.143312 | 0.047771 | 0.070064 | 0.035032 | 0.703822 |
| 196 | 5 | 0.232446 | 0.159806 | 0.135593 | 0.113801 | 0.358354 | 0.42492  | 0.022364 | 0.060703 | 0.019169 | 0.472843 |
| 165 | 5 | 0.059102 | 0.037825 | 0.120567 | 0.172577 | 0.609929 | 0.201923 | 0.038462 | 0.070513 | 0.147436 | 0.541667 |
| 187 | 5 | 0.088517 | 0.181818 | 0.105263 | 0.117225 | 0.507177 | 0.319876 | 0.055901 | 0.118012 | 0.136646 | 0.369565 |
| 191 | 5 | 0.407143 | 0.119048 | 0.152381 | 0.15     | 0.171429 | 0.40407  | 0.063953 | 0.069767 | 0.023256 | 0.438953 |
| 184 | 5 | 0.381546 | 0.134663 | 0.062344 | 0.029925 | 0.391521 | 0.245509 | 0.10479  | 0.131737 | 0.062874 | 0.45509  |
| 161 | 5 | 0.050602 | 0.06506  | 0.127711 | 0.277108 | 0.479518 | 0.117834 | 0.019108 | 0.079618 | 0.149682 | 0.633758 |
| 180 | 5 | 0.186224 | 0.30102  | 0.19898  | 0.053571 | 0.260204 | 0.360248 | 0.046584 | 0.068323 | 0.037267 | 0.487578 |
| 175 | 5 | 0.097902 | 0.072261 | 0.090909 | 0.132867 | 0.606061 | 0.096386 | 0.009036 | 0.090361 | 0.045181 | 0.759036 |
| 179 | 5 | 0.2525   | 0.0825   | 0.1375   | 0.1125   | 0.415    | 0.168675 | 0.036145 | 0.120482 | 0.069277 | 0.605422 |
| 168 | 5 | 0.048193 | 0.079518 | 0.151807 | 0.13012  | 0.590361 | 0.242331 | 0.131902 | 0.095092 | 0.214724 | 0.315951 |
| 189 | 5 | 0.167095 | 0.174807 | 0.041131 | 0.061697 | 0.55527  | 0.532308 | 0.049231 | 0.055385 | 0.030769 | 0.332308 |
| 173 | 5 | 0.045662 | 0.041096 | 0.093607 | 0.06621  | 0.753425 | 0.113889 | 0.025    | 0.088889 | 0.213889 | 0.558333 |
| 194 | 5 | 0.034169 | 0.300683 | 0.111617 | 0.157175 | 0.396355 | 0.117089 | 0.028481 | 0.079114 | 0.06962  | 0.705696 |
| 195 | 5 | 0.031325 | 0.301205 | 0.077108 | 0.13494  | 0.455422 | 0.205696 | 0.03481  | 0.03481  | 0.06962  | 0.655063 |
| 170 | 5 | 0.062356 | 0.124711 | 0.096998 | 0.2194   | 0.496536 | 0.102564 | 0.028846 | 0.147436 | 0.304487 | 0.416667 |
| 174 | 5 | 0.086957 | 0.052632 | 0.08238  | 0.15103  | 0.627002 | 0.093939 | 0.018182 | 0.039394 | 0.042424 | 0.806061 |
| 163 | 5 | 0.032558 | 0.046512 | 0.093023 | 0.139535 | 0.688372 | 0.148148 | 0.010101 | 0.043771 | 0.127946 | 0.670034 |
| 181 | 5 | 0.083135 | 0.185273 | 0.159145 | 0.071259 | 0.501188 | 0.211656 | 0.03681  | 0.067485 | 0.116564 | 0.567485 |

---

Table S11

| Sample number | Class label | FT-MIR-Bo tree votes (Validation set) |          |          |          |          | NIR-Bo tree votes (Validation set) |          |          |          |          |
|---------------|-------------|---------------------------------------|----------|----------|----------|----------|------------------------------------|----------|----------|----------|----------|
|               |             | Class 1                               | Class 2  | Class 3  | Class 4  | Class 5  | Class 1                            | Class 2  | Class 3  | Class 4  | Class 5  |
| 4             | 1           | 0.584427                              | 0.108486 | 0.208224 | 0.069991 | 0.028871 | 0.204571                           | 0.264    | 0.344    | 0.166857 | 0.020571 |
| 6             | 1           | 0.348206                              | 0.211724 | 0.172353 | 0.15748  | 0.110236 | 0.162286                           | 0.105143 | 0.170286 | 0.505143 | 0.057143 |
| 8             | 1           | 0.44357                               | 0.134733 | 0.134733 | 0.115486 | 0.171479 | 0.624                              | 0.059429 | 0.091429 | 0.051429 | 0.173714 |
| 10            | 1           | 0.877515                              | 0.051619 | 0.023622 | 0.016623 | 0.030621 | 0.458286                           | 0.014857 | 0.085714 | 0.032    | 0.409143 |
| 13            | 1           | 0.369204                              | 0.106737 | 0.158355 | 0.181977 | 0.183727 | 0.185143                           | 0.243429 | 0.16     | 0.372571 | 0.038857 |
| 15            | 1           | 0.127734                              | 0.122485 | 0.48119  | 0.167104 | 0.101487 | 0.168                              | 0.178286 | 0.333714 | 0.24     | 0.08     |
| 22            | 1           | 0.325459                              | 0.132108 | 0.077865 | 0.107612 | 0.356955 | 0.237714                           | 0.131429 | 0.204571 | 0.284571 | 0.141714 |
| 24            | 1           | 0.40245                               | 0.127734 | 0.090114 | 0.142607 | 0.237095 | 0.385143                           | 0.051429 | 0.068571 | 0.28     | 0.214857 |
| 28            | 1           | 0.594926                              | 0.154856 | 0.079615 | 0.067367 | 0.103237 | 0.652571                           | 0.051429 | 0.104    | 0.068571 | 0.123429 |
| 30            | 1           | 0.728784                              | 0.045494 | 0.051619 | 0.074366 | 0.099738 | 0.467429                           | 0.046857 | 0.068571 | 0.060571 | 0.356571 |
| 32            | 1           | 0.258093                              | 0.088364 | 0.199475 | 0.055118 | 0.39895  | 0.412571                           | 0.048    | 0.043429 | 0.096    | 0.4      |
| 34            | 1           | 0.501312                              | 0.131234 | 0.11636  | 0.125984 | 0.125109 | 0.501714                           | 0.034286 | 0.179429 | 0.038857 | 0.245714 |
| 35            | 1           | 0.425197                              | 0.074366 | 0.167104 | 0.125109 | 0.208224 | 0.580571                           | 0.016    | 0.035429 | 0.090286 | 0.277714 |
| 37            | 1           | 0.568679                              | 0.091864 | 0.079615 | 0.073491 | 0.186352 | 0.64                               | 0.034286 | 0.042286 | 0.028571 | 0.254857 |
| 42            | 2           | 0.111986                              | 0.251969 | 0.257218 | 0.223972 | 0.154856 | 0.212571                           | 0.296    | 0.32     | 0.124571 | 0.046857 |
| 43            | 2           | 0.067367                              | 0.296588 | 0.268591 | 0.252843 | 0.114611 | 0.221714                           | 0.245714 | 0.204571 | 0.272    | 0.056    |
| 46            | 2           | 0.022747                              | 0.585302 | 0.183727 | 0.114611 | 0.093613 | 0.117714                           | 0.218286 | 0.118857 | 0.468571 | 0.076571 |
| 49            | 2           | 0.068241                              | 0.748906 | 0.095363 | 0.027997 | 0.059493 | 0.122286                           | 0.616    | 0.124571 | 0.068571 | 0.068571 |
| 52            | 2           | 0.025372                              | 0.738408 | 0.083115 | 0.062117 | 0.090989 | 0.170286                           | 0.340571 | 0.317714 | 0.102857 | 0.068571 |
| 58            | 2           | 0.088364                              | 0.56343  | 0.093613 | 0.12336  | 0.131234 | 0.116571                           | 0.361143 | 0.187429 | 0.308571 | 0.026286 |
| 60            | 2           | 0.03762                               | 0.749781 | 0.092738 | 0.038495 | 0.081365 | 0.021714                           | 0.891429 | 0.067429 | 0.011429 | 0.008    |
| 65            | 2           | 0.013998                              | 0.76203  | 0.117235 | 0.049869 | 0.056868 | 0.114286                           | 0.629714 | 0.054857 | 0.181714 | 0.019429 |
| 67            | 2           | 0.015748                              | 0.75678  | 0.12161  | 0.079615 | 0.026247 | 0.123429                           | 0.514286 | 0.219429 | 0.064    | 0.078857 |
| 69            | 2           | 0.023622                              | 0.666667 | 0.160105 | 0.097113 | 0.052493 | 0.145143                           | 0.580571 | 0.210286 | 0.043429 | 0.020571 |
| 71            | 2           | 0.059493                              | 0.694663 | 0.103237 | 0.027122 | 0.115486 | 0.131429                           | 0.725714 | 0.048    | 0.058286 | 0.036571 |
| 73            | 2           | 0.044619                              | 0.596675 | 0.146107 | 0.107612 | 0.104987 | 0.181714                           | 0.563429 | 0.096    | 0.145143 | 0.013714 |
| 78            | 2           | 0.034121                              | 0.696413 | 0.11811  | 0.048994 | 0.102362 | 0.075429                           | 0.763429 | 0.122286 | 0.030857 | 0.008    |
| 80            | 2           | 0.030621                              | 0.463692 | 0.223097 | 0.156605 | 0.125984 | 0.169143                           | 0.539429 | 0.138286 | 0.053714 | 0.099429 |
| 82            | 3           | 0.092738                              | 0.066492 | 0.706037 | 0.057743 | 0.07699  | 0.173714                           | 0.368    | 0.300571 | 0.123429 | 0.034286 |
| 84            | 3           | 0.055993                              | 0.152231 | 0.629046 | 0.102362 | 0.060367 | 0.273143                           | 0.2      | 0.294857 | 0.157714 | 0.074286 |
| 86            | 3           | 0.093613                              | 0.067367 | 0.631671 | 0.127734 | 0.079615 | 0.290286                           | 0.181714 | 0.299429 | 0.114286 | 0.114286 |
| 88            | 3           | 0.024497                              | 0.188976 | 0.384952 | 0.218723 | 0.182852 | 0.074286                           | 0.136    | 0.274286 | 0.465143 | 0.050286 |
| 89            | 3           | 0.026247                              | 0.195101 | 0.458443 | 0.161855 | 0.158355 | 0.083429                           | 0.067429 | 0.260571 | 0.485714 | 0.102857 |
| 92            | 3           | 0.090989                              | 0.184602 | 0.584427 | 0.081365 | 0.058618 | 0.451429                           | 0.131429 | 0.128    | 0.032    | 0.257143 |
| 93            | 3           | 0.086614                              | 0.153106 | 0.629921 | 0.068241 | 0.062117 | 0.478857                           | 0.112    | 0.169143 | 0.052571 | 0.187429 |
| 94            | 3           | 0.048119                              | 0.073491 | 0.684164 | 0.106737 | 0.087489 | 0.361143                           | 0.045714 | 0.214857 | 0.108571 | 0.269714 |
| 95            | 3           | 0.230096                              | 0.108486 | 0.511811 | 0.093613 | 0.055993 | 0.486857                           | 0.094857 | 0.137143 | 0.034286 | 0.246857 |
| 98            | 3           | 0.024497                              | 0.124234 | 0.433946 | 0.367454 | 0.049869 | 0.124571                           | 0.116571 | 0.315429 | 0.419429 | 0.024    |
| 103           | 3           | 0.036745                              | 0.074366 | 0.468066 | 0.244969 | 0.175853 | 0.067429                           | 0.056    | 0.373714 | 0.467429 | 0.035429 |
| 115           | 3           | 0.060367                              | 0.179353 | 0.595801 | 0.11811  | 0.046369 | 0.130286                           | 0.088    | 0.52     | 0.100571 | 0.161143 |
| 119           | 4           | 0.004374                              | 0.165354 | 0.090114 | 0.724409 | 0.015748 | 0.064                              | 0.072    | 0.117714 | 0.725714 | 0.020571 |
| 120           | 4           | 0.004374                              | 0.052493 | 0.056868 | 0.87664  | 0.009624 | 0.062857                           | 0.036571 | 0.08     | 0.797714 | 0.022857 |
| 124           | 4           | 0.010499                              | 0.045494 | 0.065617 | 0.870516 | 0.007874 | 0.125714                           | 0.088    | 0.075429 | 0.651429 | 0.059429 |
| 127           | 4           | 0.004374                              | 0.07874  | 0.076115 | 0.832896 | 0.007874 | 0.060571                           | 0.086857 | 0.146286 | 0.648    | 0.058286 |
| 132           | 4           | 0.014873                              | 0.033246 | 0.04287  | 0.889764 | 0.019248 | 0.134857                           | 0.145143 | 0.104    | 0.581714 | 0.034286 |
| 133           | 4           | 0.002625                              | 0.019248 | 0.036745 | 0.937008 | 0.004374 | 0.030857                           | 0.078857 | 0.131429 | 0.749714 | 0.009143 |

---

|     |   |          |          |          |          |          |          |          |          |          |          |
|-----|---|----------|----------|----------|----------|----------|----------|----------|----------|----------|----------|
| 135 | 4 | 0.046369 | 0.079615 | 0.136483 | 0.372703 | 0.364829 | 0.132571 | 0.118857 | 0.075429 | 0.617143 | 0.056    |
| 138 | 4 | 0.027122 | 0.069991 | 0.092738 | 0.581802 | 0.228346 | 0.042286 | 0.051429 | 0.109714 | 0.754286 | 0.042286 |
| 142 | 4 | 0.075241 | 0.101487 | 0.090114 | 0.486439 | 0.246719 | 0.083429 | 0.090286 | 0.272    | 0.505143 | 0.049143 |
| 143 | 4 | 0.043745 | 0.07874  | 0.090114 | 0.663167 | 0.124234 | 0.094857 | 0.089143 | 0.074286 | 0.702857 | 0.038857 |
| 147 | 4 | 0.03937  | 0.03937  | 0.07699  | 0.771654 | 0.072616 | 0.101714 | 0.060571 | 0.249143 | 0.510857 | 0.077714 |
| 150 | 4 | 0.054243 | 0.055993 | 0.134733 | 0.656168 | 0.098863 | 0.117714 | 0.056    | 0.164571 | 0.521143 | 0.140571 |
| 151 | 4 | 0.036745 | 0.048994 | 0.307087 | 0.468066 | 0.139108 | 0.188571 | 0.029714 | 0.082286 | 0.321143 | 0.378286 |
| 155 | 4 | 0.020122 | 0.055118 | 0.252843 | 0.629921 | 0.041995 | 0.237714 | 0.196571 | 0.084571 | 0.434286 | 0.046857 |
| 157 | 5 | 0.027122 | 0.110236 | 0.164479 | 0.206474 | 0.491689 | 0.053714 | 0.026286 | 0.284571 | 0.328    | 0.307429 |
| 158 | 5 | 0.026247 | 0.027122 | 0.077865 | 0.106737 | 0.76203  | 0.067429 | 0.030857 | 0.124571 | 0.305143 | 0.472    |
| 159 | 5 | 0.020997 | 0.026247 | 0.051619 | 0.167104 | 0.734033 | 0.078857 | 0.027429 | 0.171429 | 0.332571 | 0.389714 |
| 160 | 5 | 0.031496 | 0.038495 | 0.053368 | 0.140857 | 0.735783 | 0.085714 | 0.014857 | 0.077714 | 0.241143 | 0.580571 |
| 164 | 5 | 0.033246 | 0.040245 | 0.096238 | 0.154856 | 0.675416 | 0.208    | 0.014857 | 0.038857 | 0.131429 | 0.606857 |
| 166 | 5 | 0.049869 | 0.034121 | 0.038495 | 0.058618 | 0.818898 | 0.062857 | 0.008    | 0.038857 | 0.147429 | 0.742857 |
| 172 | 5 | 0.034996 | 0.08399  | 0.099738 | 0.197725 | 0.583552 | 0.041143 | 0.011429 | 0.074286 | 0.146286 | 0.726857 |
| 176 | 5 | 0.090114 | 0.071741 | 0.100612 | 0.150481 | 0.587052 | 0.094857 | 0.009143 | 0.022857 | 0.025143 | 0.848    |
| 177 | 5 | 0.130359 | 0.132108 | 0.401575 | 0.068241 | 0.267717 | 0.273143 | 0.026286 | 0.139429 | 0.051429 | 0.509714 |
| 183 | 5 | 0.183727 | 0.029746 | 0.074366 | 0.057743 | 0.654418 | 0.285714 | 0.077714 | 0.110857 | 0.050286 | 0.475429 |
| 185 | 5 | 0.049869 | 0.156605 | 0.15748  | 0.107612 | 0.528434 | 0.198857 | 0.026286 | 0.064    | 0.044571 | 0.666286 |
| 186 | 5 | 0.165354 | 0.151356 | 0.173228 | 0.11811  | 0.391951 | 0.313143 | 0.059429 | 0.051429 | 0.038857 | 0.537143 |
| 188 | 5 | 0.036745 | 0.038495 | 0.106737 | 0.247594 | 0.570429 | 0.109714 | 0.028571 | 0.068571 | 0.092571 | 0.700571 |
| 193 | 5 | 0.013123 | 0.182852 | 0.062992 | 0.090989 | 0.650044 | 0.070857 | 0.011429 | 0.035429 | 0.046857 | 0.835429 |

---

Table S12

| Sample number | Class label | FT-MIR-Bo tree votes (Calibration set) |          |          |          |          | NIR-Bo tree votes (Calibration set) |          |          |          |          |
|---------------|-------------|----------------------------------------|----------|----------|----------|----------|-------------------------------------|----------|----------|----------|----------|
|               |             | Class 1                                | Class 2  | Class 3  | Class 4  | Class 5  | Class 1                             | Class 2  | Class 3  | Class 4  | Class 5  |
| 36            | 1           | 0.654234                               | -0.01061 | 0.139123 | -0.13156 | 0.348814 | 0.558262                            | -0.06611 | -0.15206 | 0.509428 | 0.150477 |
| 33            | 1           | 1.08857                                | 0.135463 | 0.014791 | -0.29841 | 0.059592 | 0.683707                            | 0.089601 | -0.26057 | 0.149138 | 0.338124 |
| 12            | 1           | 0.471664                               | 0.199388 | 0.221603 | 0.103613 | 0.003732 | 0.611817                            | 0.016568 | 0.007697 | 0.436495 | -0.07258 |
| 1             | 1           | 0.886867                               | 0.06461  | 0.046081 | 0.107999 | -0.10556 | 0.501489                            | -0.15677 | 0.05261  | 0.205112 | 0.397561 |
| 2             | 1           | 0.543511                               | 0.301225 | 0.037015 | -0.011   | 0.129251 | 0.560756                            | -0.17693 | -0.10106 | 0.321317 | 0.395913 |
| 20            | 1           | 0.728328                               | -0.25977 | 0.144513 | -0.15779 | 0.544727 | 0.184416                            | 0.40578  | 0.219011 | 0.363706 | -0.17291 |
| 19            | 1           | 1.14971                                | -0.21834 | 0.137963 | -0.01713 | -0.0522  | 0.183581                            | 0.41973  | 0.170877 | 0.311137 | -0.08556 |
| 27            | 1           | 1.14539                                | 0.073306 | -0.16658 | -0.19627 | 0.14415  | 0.625997                            | 0.045978 | 0.036444 | 0.004207 | 0.287374 |
| 16            | 1           | 0.329149                               | -0.22428 | 0.25874  | -0.11764 | 0.754038 | 0.095129                            | 0.261465 | 0.280314 | 0.420817 | -0.05772 |
| 31            | 1           | 0.686163                               | 0.145887 | -0.15045 | 0.124996 | 0.193405 | 0.583778                            | 0.055969 | -0.28243 | 0.384422 | 0.258263 |
| 3             | 1           | 0.739251                               | 0.035354 | 0.086212 | 0.003229 | 0.135955 | 0.610129                            | 0.150695 | -0.0512  | 0.046899 | 0.243477 |
| 18            | 1           | 0.922362                               | -0.04008 | 0.11954  | -0.10773 | 0.105915 | 0.408399                            | 0.140683 | 0.389661 | 0.248582 | -0.18732 |
| 9             | 1           | 0.56935                                | 0.159188 | 0.171687 | 0.084871 | 0.014904 | 0.56064                             | -0.09128 | 0.295404 | -0.01964 | 0.25487  |
| 26            | 1           | 0.915651                               | 0.194781 | 0.081135 | -0.09215 | -0.09942 | 0.561807                            | 0.175946 | 0.055112 | 0.08537  | 0.121766 |
| 25            | 1           | 0.480226                               | 0.111549 | -0.09195 | 0.122915 | 0.377264 | 0.642105                            | -0.125   | 0.016971 | 0.370187 | 0.095736 |
| 23            | 1           | 0.663607                               | 0.246799 | -0.20537 | 0.178378 | 0.116585 | 0.387196                            | 0.237076 | -0.14599 | 0.243321 | 0.278392 |
| 38            | 1           | 0.725266                               | 0.052893 | 0.11567  | 0.053008 | 0.053162 | 0.700704                            | 0.138749 | -0.06647 | 0.150775 | 0.076242 |
| 14            | 1           | 0.824021                               | -0.39275 | 0.043658 | 0.224066 | 0.301007 | 0.141251                            | 0.199959 | 0.43938  | 0.361069 | -0.14166 |
| 40            | 1           | 0.484495                               | 0.166728 | 0.257264 | -0.09262 | 0.184133 | 0.375752                            | 0.092505 | 0.14028  | -0.00146 | 0.39292  |
| 5             | 1           | 0.779495                               | 0.307595 | -0.0298  | 0.01361  | -0.0709  | 0.487939                            | -0.06171 | 0.081372 | 0.515092 | -0.02269 |
| 29            | 1           | 0.749079                               | 0.13031  | 0.025452 | -0.06491 | 0.160068 | 0.685889                            | -0.08852 | 0.146789 | 0.193278 | 0.062563 |
| 39            | 1           | 0.920619                               | -0.03263 | 0.18964  | -0.14811 | 0.070482 | 0.685384                            | -0.01609 | -0.05405 | 0.38551  | -0.00075 |
| 17            | 1           | 0.35589                                | -0.26513 | 0.242862 | 0.095926 | 0.570448 | 0.309034                            | 0.403472 | 0.104287 | 0.071918 | 0.111288 |
| 7             | 1           | 0.763556                               | 0.143893 | 0.105391 | 0.089654 | -0.1025  | 0.451357                            | -0.03776 | 0.331516 | 0.179254 | 0.075635 |
| 21            | 1           | 0.522084                               | 0.149549 | 0.0309   | 0.066185 | 0.231283 | 0.399993                            | -0.21871 | -0.11248 | 0.158447 | 0.772753 |
| 11            | 1           | 0.835459                               | 0.238174 | 0.048518 | 0.032335 | -0.15448 | 0.497856                            | -0.04297 | -0.04258 | 0.190662 | 0.397035 |
| 62            | 2           | -0.04157                               | 0.730106 | 0.426604 | 0.131537 | -0.24668 | 0.122067                            | 1.02157  | 0.086868 | -0.08017 | -0.15033 |
| 59            | 2           | 0.152838                               | 1.18709  | -0.264   | 0.143662 | -0.21959 | -0.05759                            | 1.05177  | 0.109384 | 0.037655 | -0.14122 |
| 56            | 2           | -0.03525                               | 0.970161 | -0.06383 | -0.32491 | 0.453824 | -0.03647                            | 0.686684 | 0.145056 | 0.204354 | 0.000375 |
| 72            | 2           | -0.22375                               | 0.783832 | 0.146678 | 0.018156 | 0.275085 | 0.116799                            | 1.0271   | -0.2666  | 0.286347 | -0.16364 |
| 44            | 2           | -0.09288                               | 0.727889 | 0.269895 | 0.137202 | -0.04211 | 0.147013                            | 0.545495 | 0.112    | -0.04315 | 0.238644 |
| 45            | 2           | 0.347346                               | 0.741115 | 0.135176 | 0.125903 | -0.34954 | 0.094517                            | 0.533886 | 0.274407 | 0.117252 | -0.02006 |
| 63            | 2           | -0.36978                               | 1.28297  | -0.04277 | -0.06046 | 0.190034 | -0.16869                            | 0.660997 | 0.131911 | 0.044855 | 0.330929 |
| 41            | 2           | 0.091552                               | 0.648227 | -0.05374 | 0.168059 | 0.1459   | 0.277809                            | 0.25902  | 0.054423 | 0.39652  | 0.012227 |
| 51            | 2           | 0.644283                               | 0.636612 | -0.11202 | 0.144169 | -0.31304 | 0.590714                            | 0.520661 | 0.124869 | -0.04516 | -0.19109 |
| 79            | 2           | -0.14528                               | 1.00797  | -0.11014 | -0.08349 | 0.33095  | 0.043626                            | 0.830048 | -0.22954 | 0.174905 | 0.180957 |
| 48            | 2           | 0.093244                               | 0.806417 | 0.158316 | 0.032828 | -0.0908  | 0.273266                            | 0.426119 | -0.03429 | 0.238599 | 0.096309 |
| 76            | 2           | 0.215001                               | 0.64998  | -0.00053 | 0.156229 | -0.02068 | 0.223191                            | 0.803306 | 0.158541 | -0.13873 | -0.04631 |
| 68            | 2           | 0.475353                               | 0.416003 | 0.127999 | 0.220442 | -0.2398  | 0.258743                            | 0.386188 | 0.33079  | 0.133246 | -0.10897 |
| 55            | 2           | 0.255242                               | 0.728562 | -0.0656  | 0.020237 | 0.061564 | 0.191755                            | 0.574394 | 0.247484 | -0.00644 | -0.00719 |
| 61            | 2           | -0.11909                               | 0.839396 | 0.371052 | -0.11285 | 0.021491 | -0.10986                            | 0.854965 | 0.073029 | 0.246203 | -0.06433 |
| 74            | 2           | -0.03667                               | 0.748646 | 0.26137  | 0.138367 | -0.11171 | 0.098108                            | 0.913654 | 0.176819 | -0.24581 | 0.05723  |
| 70            | 2           | -0.17943                               | 0.79752  | 0.329873 | 0.066332 | -0.01429 | -0.20305                            | 0.703854 | 0.007073 | 0.3316   | 0.160528 |
| 54            | 2           | 0.350763                               | 0.672578 | 0.058782 | 0.025589 | -0.10771 | 0.194798                            | 0.698866 | 0.083076 | 0.056571 | -0.03331 |
| 66            | 2           | -0.04242                               | 1.17332  | -0.03673 | -0.18382 | 0.089651 | -0.19775                            | 1.03858  | 0.032758 | -0.08808 | 0.214487 |



---

|     |   |          |          |          |          |          |          |          |          |          |          |
|-----|---|----------|----------|----------|----------|----------|----------|----------|----------|----------|----------|
| 64  | 2 | 0.229881 | 0.496512 | 0.386745 | -0.16392 | 0.050785 | -0.19898 | 0.63483  | -0.02959 | 0.443783 | 0.149952 |
| 57  | 2 | -0.33496 | 1.00717  | 0.167775 | 0.130083 | 0.02993  | -0.10669 | 0.757446 | 0.033158 | 0.130011 | 0.186079 |
| 75  | 2 | -0.08374 | 0.941284 | 0.076049 | 0.170675 | -0.10427 | 0.225478 | 0.873941 | 0.263909 | -0.22598 | -0.13735 |
| 47  | 2 | 0.066313 | 0.754041 | 0.268593 | -0.02654 | -0.0624  | 0.115474 | 0.450232 | 0.189593 | 0.113326 | 0.131374 |
| 77  | 2 | -0.04363 | 0.761669 | -0.11931 | 0.25707  | 0.144197 | -0.15214 | 0.817218 | 0.348347 | -0.17827 | 0.16484  |
| 53  | 2 | 0.194256 | 0.910701 | -0.17604 | 0.19154  | -0.12045 | -0.00227 | 0.668696 | 0.17643  | 0.108807 | 0.048336 |
| 50  | 2 | 0.04544  | 0.727227 | 0.183682 | -0.17719 | 0.220843 | 0.012458 | 0.293972 | 0.162924 | 0.251016 | 0.279631 |
| 101 | 3 | 0.40222  | -0.1916  | 0.665743 | 0.095743 | 0.027897 | -0.01826 | 0.092791 | 0.860533 | 0.04707  | 0.01787  |
| 91  | 3 | 0.050626 | 0.349324 | 0.664841 | -0.07552 | 0.010732 | 0.321047 | 0.344804 | 0.342137 | -0.25599 | 0.248005 |
| 90  | 3 | -0.11118 | 0.036083 | 0.590385 | 0.046121 | 0.438588 | -0.07006 | 0.004082 | 0.016493 | 0.507968 | 0.541518 |
| 87  | 3 | 0.377794 | -0.02948 | 0.561324 | 0.100185 | -0.00982 | 0.279329 | 0.30415  | 0.178417 | -0.00193 | 0.240028 |
| 99  | 3 | 0.106675 | 0.265505 | 0.687359 | 0.136411 | -0.19595 | 0.003281 | 0.419573 | 0.578598 | 0.222579 | -0.22403 |
| 114 | 3 | 0.153798 | -0.00585 | 0.976027 | 0.162508 | -0.28648 | 0.367362 | -0.12615 | 0.831369 | 0.056636 | -0.12922 |
| 116 | 3 | 0.213405 | 0.311917 | 0.87153  | 0.146985 | -0.54384 | 0.210367 | -0.01888 | 0.925147 | -0.10521 | -0.01142 |
| 102 | 3 | -0.24923 | 0.093465 | 0.601489 | 0.265275 | 0.289002 | -0.05079 | 0.144494 | 0.587784 | 0.155995 | 0.162522 |
| 104 | 3 | 0.192867 | 0.049052 | 0.783877 | -0.06439 | 0.038596 | -0.01973 | -0.09134 | 1.14548  | -0.15555 | 0.121145 |
| 83  | 3 | 0.050315 | 0.154558 | 0.756963 | -0.01294 | 0.051106 | 0.159842 | 0.414256 | 0.349952 | -0.06163 | 0.137583 |
| 110 | 3 | 0.016735 | 0.010285 | 0.769619 | 0.161819 | 0.041543 | 0.063131 | -0.07938 | 0.96968  | 0.15724  | -0.11067 |
| 108 | 3 | 0.186493 | 0.229437 | 0.506085 | 0.111445 | -0.03346 | 0.118982 | 0.053101 | 0.967672 | -0.09879 | -0.04096 |
| 81  | 3 | -0.01493 | 0.098416 | 0.553611 | 0.136984 | 0.225918 | -0.15755 | 0.511106 | 0.452294 | -0.08315 | 0.277305 |
| 107 | 3 | 0.193581 | -0.06544 | 0.763858 | 0.059033 | 0.048966 | 0.111284 | -0.01864 | 0.819592 | 0.19954  | -0.11178 |
| 112 | 3 | 0.104003 | 0.057247 | 0.733996 | 0.111805 | -0.00705 | 0.307486 | -0.2479  | 0.85306  | 0.25336  | -0.16601 |
| 113 | 3 | 0.148045 | 0.246981 | 1.10105  | -0.24635 | -0.24972 | 0.411263 | -0.01376 | 0.698304 | 0.074322 | -0.17013 |
| 97  | 3 | -0.25161 | -0.04437 | 0.671082 | 0.363019 | 0.261882 | -0.43797 | -0.08966 | 1.10657  | 0.638417 | -0.21736 |
| 85  | 3 | -0.03204 | 0.101307 | 0.776261 | 0.151042 | 0.003434 | -0.07735 | 0.242919 | 0.660144 | 0.046679 | 0.127606 |
| 109 | 3 | 0.082844 | 0.166026 | 0.429746 | -0.05043 | 0.371811 | 0.107377 | 0.006655 | 0.726918 | 0.034683 | 0.124367 |
| 105 | 3 | -0.09595 | -0.03172 | 0.882791 | 0.005487 | 0.239394 | -0.3197  | -0.04358 | 1.10165  | -0.10224 | 0.363873 |
| 100 | 3 | 0.032304 | 0.093779 | 0.530235 | 0.134147 | 0.209536 | -0.21646 | 0.443238 | 0.561869 | 0.229765 | -0.01841 |
| 111 | 3 | 0.074247 | 0.087387 | 0.646762 | 0.068242 | 0.123362 | -0.00938 | -0.09024 | 0.78358  | 0.133732 | 0.182306 |
| 96  | 3 | 0.191727 | 0.192212 | 0.580035 | 0.007825 | 0.028201 | 0.256177 | 0.541524 | 0.471902 | -0.17462 | -0.09498 |
| 106 | 3 | 0.050868 | 0.149364 | 0.604675 | 0.163614 | 0.03148  | 0.159165 | 0.059674 | 0.500099 | 0.019276 | 0.261786 |
| 152 | 4 | 0.009381 | -0.08712 | 0.15775  | 0.737186 | 0.182802 | 0.276584 | 0.197537 | 0.021736 | 0.424983 | 0.07916  |
| 121 | 4 | 0.005379 | 0.009133 | -0.07445 | 1.06713  | -0.00719 | 0.493186 | 0.130033 | -0.35927 | 1.08392  | -0.34787 |
| 125 | 4 | -0.05214 | 0.206009 | -0.05271 | 1.04945  | -0.15061 | -0.05395 | 0.087723 | 0.095415 | 0.579286 | 0.291526 |
| 128 | 4 | -0.07486 | -0.17848 | -0.16342 | 1.22494  | 0.191834 | 0.285048 | 0.142342 | -0.20754 | 0.636468 | 0.143678 |
| 145 | 4 | -0.08586 | -0.26477 | 0.639993 | 0.862846 | -0.15221 | 0.456203 | -0.20059 | 0.332247 | 0.452308 | -0.04016 |
| 156 | 4 | -0.03336 | 0.226259 | 0.090941 | 0.526981 | 0.189179 | 0.180268 | 0.288565 | -0.13252 | 0.675792 | -0.01211 |
| 126 | 4 | -0.14715 | 0.090178 | -0.02761 | 1.18198  | -0.09741 | 0.121979 | 0.069777 | 0.019933 | 0.438508 | 0.349803 |
| 131 | 4 | 0.125178 | 0.263303 | -0.31449 | 0.882893 | 0.043117 | 0.270321 | 0.208174 | -0.00236 | 0.537076 | -0.01321 |
| 117 | 4 | -0.33959 | -0.14272 | 0.628849 | 0.928172 | -0.07471 | 0.263855 | 0.116175 | 0.034183 | 0.919687 | -0.3339  |
| 122 | 4 | 0.03213  | -0.10693 | 0.063161 | 0.953765 | 0.057877 | 0.198071 | 0.145504 | -0.22445 | 1.05689  | -0.17602 |
| 149 | 4 | -0.00561 | 0.166942 | -0.00982 | 0.728777 | 0.119704 | 0.432974 | -0.05196 | 0.011385 | 0.405097 | 0.202508 |
| 153 | 4 | 0.166656 | -0.09829 | 0.12777  | 0.809017 | -0.00515 | 0.32016  | 0.289623 | 0.013141 | 0.496249 | -0.11917 |
| 146 | 4 | -0.04769 | -0.17825 | 0.114015 | 0.863997 | 0.247922 | 0.297663 | 0.020057 | 0.09117  | 0.394689 | 0.196421 |
| 123 | 4 | 0.09845  | 0.0601   | 0.114198 | 0.854487 | -0.12724 | 0.460215 | 0.032564 | 0.23864  | 0.345317 | -0.07674 |
| 139 | 4 | 0.101179 | -0.21024 | 0.261084 | 0.723996 | 0.123984 | 0.328874 | 0.091764 | 0.130898 | 0.563951 | -0.11549 |
| 140 | 4 | 0.117096 | 0.237697 | -0.06926 | 0.580105 | 0.134363 | 0.120149 | 0.066251 | 0.211565 | 0.475007 | 0.127028 |
| 137 | 4 | -0.17778 | 0.161555 | 0.083127 | 0.749435 | 0.183667 | 0.113449 | 0.035694 | 0.311539 | 0.417485 | 0.121833 |
| 144 | 4 | 0.078488 | -0.10868 | 0.193729 | 0.846919 | -0.01046 | 0.271379 | 0.096911 | 0.279194 | 0.272949 | 0.079567 |

---

---

|     |   |          |          |          |          |          |          |          |          |          |          |
|-----|---|----------|----------|----------|----------|----------|----------|----------|----------|----------|----------|
| 130 | 4 | 0.204431 | -0.06098 | 0.022312 | 0.87758  | -0.04334 | 0.047004 | 0.245566 | 0.167945 | 0.502738 | 0.036746 |
| 118 | 4 | 0.213605 | 0.007883 | 0.283032 | 0.740024 | -0.24454 | 0.162014 | 0.195571 | 0.179614 | 0.732248 | -0.26945 |
| 148 | 4 | -0.04982 | 0.356595 | -0.29999 | 0.79173  | 0.201489 | 0.373479 | -0.18129 | -0.01322 | 0.657574 | 0.163458 |
| 134 | 4 | 0.000119 | 0.364539 | 0.013908 | 0.141564 | 0.47987  | 0.036864 | -0.04771 | 0.098237 | 0.730187 | 0.182419 |
| 141 | 4 | -0.11283 | 0.272333 | 0.1083   | 0.581231 | 0.150969 | 0.11524  | 0.067685 | 0.305041 | 0.468665 | 0.043368 |
| 136 | 4 | 0.054555 | 0.157556 | 0.3653   | 0.246958 | 0.175631 | 0.167492 | 0.026491 | 0.078676 | 0.741187 | -0.01385 |
| 154 | 4 | -0.20375 | 0.101233 | 0.191161 | 0.815364 | 0.095993 | 0.266086 | 0.196289 | 0.03509  | 0.374905 | 0.12763  |
| 129 | 4 | -0.01074 | -0.09995 | -0.46884 | 1.48042  | 0.099114 | 0.280675 | -0.00548 | 0.021853 | 0.685564 | 0.017389 |
| 192 | 5 | 0.140281 | 0.183964 | -0.27268 | 0.229655 | 0.718775 | 0.164807 | 0.175391 | 0.050719 | -0.21937 | 0.828448 |
| 171 | 5 | 0.055632 | -0.14854 | 0.132241 | 0.189486 | 0.771181 | 0.073922 | -0.09908 | 0.058012 | 0.219321 | 0.747826 |
| 169 | 5 | 0.050046 | 0.019033 | 0.434673 | 0.017817 | 0.47843  | 0.138617 | 0.104355 | 0.065215 | 0.301374 | 0.390439 |
| 162 | 5 | 0.264524 | -0.08176 | 0.028901 | -0.0339  | 0.822235 | -0.0542  | -0.17063 | 0.134659 | 0.240985 | 0.849187 |
| 182 | 5 | 0.375921 | -0.10234 | -0.15011 | 0.110149 | 0.766379 | 0.642627 | -0.08912 | 0.043086 | -0.05534 | 0.458747 |
| 190 | 5 | 0.013491 | -0.23269 | 0.273567 | -0.01266 | 0.958294 | 0.185355 | 0.353201 | 0.122582 | -0.02282 | 0.361683 |
| 167 | 5 | 0.273735 | -0.12844 | -0.1404  | 0.156965 | 0.838139 | 0.332131 | -0.25853 | 0.041558 | 0.173106 | 0.711734 |
| 178 | 5 | 0.077011 | 0.21976  | -0.0003  | -0.16501 | 0.868544 | -0.13784 | 0.354722 | 0.075337 | -0.25449 | 0.962279 |
| 196 | 5 | 0.254507 | 0.176587 | -0.27525 | 0.183622 | 0.660533 | 0.458181 | -0.02819 | 0.186289 | -0.1648  | 0.548519 |
| 165 | 5 | -0.01963 | -0.21474 | 0.438073 | 0.207403 | 0.58889  | 0.212717 | -0.19759 | 0.022585 | 0.114933 | 0.847358 |
| 187 | 5 | 0.246456 | -0.06975 | -0.19037 | 0.150165 | 0.863495 | 0.217895 | 0.340789 | -0.2662  | 0.136499 | 0.571013 |
| 191 | 5 | 0.426344 | -0.11383 | -0.22459 | 0.131614 | 0.780454 | 0.443461 | 0.178945 | -0.14975 | -0.13416 | 0.6615   |
| 184 | 5 | 0.364176 | -0.02773 | 0.025687 | -0.15664 | 0.794504 | 0.010313 | 0.507107 | -0.1328  | -0.16782 | 0.7832   |
| 161 | 5 | 0.172221 | 0.068629 | 0.027236 | 0.050804 | 0.681111 | 0.162926 | -0.22546 | 0.107469 | 0.176933 | 0.778128 |
| 180 | 5 | 0.190834 | -0.06042 | 0.271259 | -0.03826 | 0.636586 | 0.21869  | 0.13309  | 0.027671 | -0.08759 | 0.708134 |
| 175 | 5 | 0.177572 | 0.108944 | 0.045538 | 0.00484  | 0.663105 | -0.01055 | -0.14483 | 0.273324 | -0.10352 | 0.98557  |
| 179 | 5 | 0.308914 | -0.02874 | 0.030893 | 0.061233 | 0.627702 | -0.06912 | 0.277867 | 0.109088 | -0.20176 | 0.883919 |
| 168 | 5 | -0.10467 | -0.11812 | 0.39407  | 0.052475 | 0.776252 | 0.050152 | 0.147282 | 0.151499 | 0.148024 | 0.503043 |
| 189 | 5 | 0.352452 | -0.0796  | -0.16137 | 0.126579 | 0.761937 | 0.477356 | 0.066614 | 0.071232 | -0.00996 | 0.394762 |
| 173 | 5 | -0.07841 | 0.059287 | 0.358204 | -0.13388 | 0.794795 | 0.019687 | -0.35315 | 0.225978 | 0.2982   | 0.809284 |
| 194 | 5 | -0.15284 | 0.246629 | -0.12077 | 0.196382 | 0.830601 | -0.0437  | 0.059501 | 0.188858 | -0.09578 | 0.891119 |
| 195 | 5 | -0.10383 | 0.213231 | -0.05033 | 0.232343 | 0.708586 | 0.022775 | 0.096065 | 0.174124 | -0.19044 | 0.897477 |
| 170 | 5 | 0.171899 | 0.10713  | -0.01997 | 0.134415 | 0.606522 | 0.12695  | 0.115861 | -0.05725 | 0.321084 | 0.493357 |
| 174 | 5 | 0.188584 | 0.000376 | 0.10872  | 0.087206 | 0.615114 | 0.058882 | -0.06042 | 0.085714 | -0.12471 | 1.04054  |
| 163 | 5 | 0.104197 | -0.01703 | 0.076145 | 0.044394 | 0.792292 | 0.196367 | -0.08793 | -0.22785 | 0.351772 | 0.767644 |
| 181 | 5 | 0.164439 | -0.00869 | 0.07606  | -0.06254 | 0.830735 | 0.070794 | -0.00776 | 0.129801 | -0.00511 | 0.812272 |

---

Table S13

| Sample number | Class label | FT-MIR-Bo tree votes (Validation set) |          |          |          |          | NIR-Bo tree votes (Validation set) |          |          |          |          |
|---------------|-------------|---------------------------------------|----------|----------|----------|----------|------------------------------------|----------|----------|----------|----------|
|               |             | Class 1                               | Class 2  | Class 3  | Class 4  | Class 5  | Class 1                            | Class 2  | Class 3  | Class 4  | Class 5  |
| 4             | 1           | 0.629762                              | 0.156704 | 0.15242  | 0.031494 | 0.029619 | 0.307787                           | 0.167566 | 0.308963 | 0.293323 | -0.07764 |
| 6             | 1           | 0.415001                              | 0.223477 | 0.095563 | 0.097393 | 0.168566 | 0.200131                           | 0.070401 | 0.218816 | 0.390178 | 0.120475 |
| 8             | 1           | 0.475554                              | 0.067417 | 0.123989 | 0.117443 | 0.215598 | 0.508176                           | 0.028748 | 0.125476 | 0.13069  | 0.206911 |
| 10            | 1           | 0.767028                              | 0.170241 | -0.04157 | 0.080682 | 0.023618 | 0.368855                           | -0.12322 | 0.257061 | -0.00348 | 0.500792 |
| 13            | 1           | 0.511023                              | -0.00226 | 0.286418 | 0.238933 | -0.03411 | 0.121127                           | 0.234893 | 0.337104 | 0.358039 | -0.05116 |
| 15            | 1           | 0.314626                              | 0.261308 | 0.158624 | 0.165032 | 0.100409 | -0.11544                           | 0.343309 | 0.517012 | 0.046146 | 0.208975 |
| 22            | 1           | 0.548241                              | -0.01194 | 0.022058 | -0.01219 | 0.453829 | 0.389583                           | 0.062907 | 0.028703 | 0.379909 | 0.138898 |
| 24            | 1           | 0.392129                              | -0.03528 | 0.025036 | 0.159837 | 0.458277 | 0.373572                           | 0.106987 | -0.15076 | 0.3475   | 0.322704 |
| 28            | 1           | 0.56932                               | 0.043479 | 0.259877 | -0.03792 | 0.165243 | 0.609429                           | -0.08151 | 0.189445 | 0.297188 | -0.01455 |
| 30            | 1           | 0.740108                              | -0.02892 | 0.092548 | -0.04427 | 0.240541 | 0.384674                           | -0.00159 | 0.060243 | 0.179015 | 0.377661 |
| 32            | 1           | 0.422644                              | -0.15828 | 0.365592 | -0.16373 | 0.533774 | 0.492653                           | -0.04542 | -0.10022 | 0.396776 | 0.256205 |
| 34            | 1           | 1.18641                               | 0.00861  | -0.20475 | 0.101374 | -0.09165 | 0.594252                           | -0.00536 | 0.118082 | 0.144429 | 0.148597 |
| 35            | 1           | 0.643108                              | -0.14217 | 0.205397 | -0.11347 | 0.407136 | 0.627805                           | -0.14659 | -0.2026  | 0.472333 | 0.249044 |
| 37            | 1           | 0.435375                              | 0.012341 | 0.445422 | -0.15844 | 0.265298 | 0.613513                           | -0.10498 | 0.095089 | 0.12877  | 0.26761  |
| 42            | 2           | -0.17698                              | 0.564548 | 0.170932 | 0.401656 | 0.039841 | 0.216785                           | 0.206888 | 0.399226 | 0.172261 | 0.00484  |
| 43            | 2           | 0.138327                              | 0.632912 | 0.020704 | 0.174371 | 0.033686 | 0.156819                           | 0.076719 | 0.365625 | 0.207951 | 0.192886 |
| 46            | 2           | 0.029609                              | 0.819205 | -0.01264 | -0.01134 | 0.175173 | -0.02084                           | 0.228136 | 0.119707 | 0.338235 | 0.334763 |
| 49            | 2           | 0.173349                              | 0.792731 | 0.096172 | -0.0458  | -0.01646 | 0.095313                           | 0.47253  | 0.1838   | -0.05911 | 0.307468 |
| 52            | 2           | 0.110338                              | 0.932086 | -0.08312 | -0.05907 | 0.099759 | -0.01079                           | 0.431762 | 0.447679 | -0.01648 | 0.147826 |
| 58            | 2           | 0.001005                              | 0.708155 | -0.0952  | 0.37901  | 0.007027 | -0.1028                            | 0.481512 | 0.351669 | 0.225162 | 0.044455 |
| 60            | 2           | -0.09653                              | 0.911193 | -0.0083  | 0.217257 | -0.02362 | -0.00202                           | 0.860069 | 0.247373 | -0.07607 | -0.02935 |
| 65            | 2           | -0.11434                              | 0.98335  | 0.318661 | -0.19348 | 0.005815 | 0.005442                           | 0.804785 | -0.16551 | 0.441017 | -0.08573 |
| 67            | 2           | 0.14692                               | 0.538651 | 0.288411 | 0.057294 | -0.03128 | -0.01135                           | 0.754658 | 0.027255 | -0.04353 | 0.272965 |
| 69            | 2           | -0.11804                              | 0.496712 | 0.409843 | 0.187517 | 0.02397  | -0.03578                           | 0.75466  | 0.262139 | -0.00684 | 0.025816 |
| 71            | 2           | -0.16994                              | 1.1525   | -0.06394 | -0.10786 | 0.189234 | 0.10073                            | 1.07438  | -0.12256 | 0.063571 | -0.11612 |
| 73            | 2           | -0.15802                              | 0.574479 | 0.194251 | 0.27897  | 0.110322 | 0.088054                           | 0.62897  | 0.130155 | 0.31394  | -0.16112 |
| 78            | 2           | -0.10685                              | 0.738584 | 0.253039 | -0.01215 | 0.127374 | -0.03223                           | 0.73926  | 0.267755 | -0.00054 | 0.025757 |
| 80            | 2           | -0.04079                              | 0.621186 | 0.194977 | 0.118454 | 0.10617  | -0.1138                            | 0.630779 | 0.178933 | -0.05386 | 0.357954 |
| 82            | 3           | 0.164088                              | -5.3E-05 | 0.589285 | 0.016657 | 0.230023 | -0.1063                            | 0.392379 | 0.532632 | 0.012779 | 0.168512 |
| 84            | 3           | 0.086168                              | 0.085206 | 0.664889 | -0.00841 | 0.172143 | 0.099745                           | 0.408157 | 0.147189 | 0.006433 | 0.338476 |
| 86            | 3           | 0.106927                              | 0.02547  | 0.58515  | 0.177995 | 0.104458 | 0.149647                           | 0.299194 | 0.145334 | 0.054271 | 0.351553 |
| 88            | 3           | -0.13607                              | 0.110981 | 0.354281 | 0.190602 | 0.480204 | -0.14472                           | 0.269603 | 0.302421 | 0.232157 | 0.340535 |
| 89            | 3           | -0.15083                              | 0.165057 | 0.547706 | 0.073496 | 0.364575 | 0.106826                           | 0.05274  | 0.080654 | 0.419883 | 0.339897 |
| 92            | 3           | 0.102585                              | 0.204706 | 0.40317  | 0.254057 | 0.035482 | 0.35624                            | 0.33948  | -0.05496 | 0.003999 | 0.355245 |
| 93            | 3           | 0.11898                               | 0.228175 | 0.546778 | 0.166298 | -0.06023 | 0.472254                           | 0.108381 | 0.307666 | -0.04646 | 0.158159 |
| 94            | 3           | 0.072851                              | 0.06303  | 0.5283   | 0.083358 | 0.252461 | 0.214212                           | -0.09705 | 0.431268 | -0.01115 | 0.462721 |
| 95            | 3           | 0.183533                              | 0.175816 | 0.412299 | 0.141226 | 0.087127 | 0.49337                            | 0.150793 | 0.142016 | -0.09715 | 0.310971 |
| 98            | 3           | -0.22109                              | 0.528953 | 0.487374 | 0.326287 | -0.12153 | -0.21984                           | 0.349075 | 0.563898 | 0.280022 | 0.026843 |
| 103           | 3           | -0.16816                              | -0.32285 | 1.01796  | 0.305805 | 0.167241 | 0.10143                            | -0.18935 | 0.744231 | 0.551595 | -0.20791 |
| 115           | 3           | -0.03234                              | 0.211332 | 0.788816 | 0.152327 | -0.12014 | 0.211029                           | 0.058437 | 0.592262 | 0.014842 | 0.12343  |
| 119           | 4           | -0.16514                              | 0.255755 | 0.51689  | 0.827705 | -0.43521 | 0.227668                           | 0.166744 | -0.00534 | 0.733962 | -0.12303 |
| 120           | 4           | 0.029998                              | 0.152035 | 0.226092 | 0.714595 | -0.12272 | 0.222679                           | -0.04352 | -0.01973 | 0.938661 | -0.09809 |
| 124           | 4           | 0.343787                              | 0.103356 | -0.10593 | 0.751433 | -0.09264 | 0.364991                           | -0.17653 | 0.037715 | 0.766154 | 0.007668 |
| 127           | 4           | 0.192168                              | 0.25253  | 0.058942 | 0.764868 | -0.26851 | 0.170147                           | 0.111676 | 0.016722 | 0.553105 | 0.148351 |
| 132           | 4           | 0.033669                              | -0.11329 | -0.15745 | 1.20771  | 0.029355 | 0.233383                           | 0.185117 | 0.037576 | 0.645181 | -0.10126 |
| 133           | 4           | -0.01676                              | 0.018646 | 0.046217 | 1.1792   | -0.2273  | 0.137093                           | 0.105997 | 0.217569 | 0.641476 | -0.10214 |

---

|     |   |          |          |          |          |          |          |          |          |          |          |
|-----|---|----------|----------|----------|----------|----------|----------|----------|----------|----------|----------|
| 135 | 4 | 0.151166 | 0.053012 | 0.052215 | 0.215015 | 0.528592 | 0.233335 | -0.00722 | 0.099297 | 0.588103 | 0.08648  |
| 138 | 4 | -0.31897 | -0.00077 | 0.134446 | 0.759467 | 0.425826 | 0.08071  | 0.124156 | 0.073174 | 0.587417 | 0.134542 |
| 142 | 4 | 0.216379 | -0.07555 | 0.036622 | 0.580442 | 0.242105 | 0.127731 | 0.195347 | 0.218973 | 0.38314  | 0.074809 |
| 143 | 4 | -0.01893 | 0.088441 | -0.00291 | 0.755423 | 0.177978 | 0.184001 | 0.131215 | -0.03076 | 0.530959 | 0.184582 |
| 147 | 4 | -0.07425 | -0.10258 | 0.012752 | 0.859819 | 0.304257 | 0.393986 | -0.05714 | 0.106137 | 0.535503 | 0.021513 |
| 150 | 4 | 0.142024 | -0.16211 | 0.055356 | 0.825594 | 0.139134 | 0.330206 | 0.023726 | -0.04895 | 0.557194 | 0.137821 |
| 151 | 4 | 0.015852 | -0.06506 | 0.233389 | 0.666068 | 0.14975  | 0.402202 | -0.08472 | -0.15776 | 0.454012 | 0.386263 |
| 155 | 4 | -0.18109 | 0.095237 | 0.187878 | 0.739694 | 0.158278 | 0.320344 | 0.150789 | 0.014952 | 0.521896 | -0.00798 |
| 157 | 5 | 0.048106 | 0.066874 | 0.189857 | 0.067235 | 0.627928 | -0.07262 | -0.12361 | 0.298315 | 0.377259 | 0.520654 |
| 158 | 5 | 0.103057 | 0.100775 | 0.054129 | -0.04254 | 0.784574 | -0.02953 | 0.019412 | -0.06286 | 0.356314 | 0.716665 |
| 159 | 5 | 0.08978  | -0.10048 | 0.086687 | 0.091168 | 0.83284  | 0.090911 | 0.021634 | 0.041634 | 0.361476 | 0.484345 |
| 160 | 5 | 0.031938 | 0.095837 | -0.06274 | 0.120549 | 0.814412 | 0.095276 | -0.01756 | -0.048   | 0.340985 | 0.629299 |
| 164 | 5 | 0.137295 | 0.16223  | -0.045   | 0.056049 | 0.689422 | 0.373777 | -0.26413 | -0.14471 | 0.303495 | 0.73157  |
| 166 | 5 | 0.072367 | -0.1338  | 0.10431  | 0.149136 | 0.80799  | 0.201636 | -0.18188 | -0.15515 | 0.470376 | 0.665023 |
| 172 | 5 | 0.093377 | 0.239185 | 0.142589 | 0.021955 | 0.502894 | 0.098369 | -0.02935 | -0.07322 | 0.273267 | 0.730936 |
| 176 | 5 | 0.036184 | 0.047022 | 0.314247 | 0.140994 | 0.461552 | 0.222228 | -0.21918 | -0.02295 | 0.059157 | 0.960747 |
| 177 | 5 | 0.445504 | 0.068137 | 0.040711 | -0.27354 | 0.719192 | -0.02927 | 0.204077 | 0.397336 | -0.41078 | 0.838636 |
| 183 | 5 | 0.382457 | -0.36982 | 0.14847  | -0.12694 | 0.965834 | 0.140804 | 0.366689 | 0.027638 | -0.09656 | 0.561435 |
| 185 | 5 | 0.152328 | -0.06346 | -0.00948 | 0.100479 | 0.820131 | 0.039153 | 0.238374 | 0.058746 | -0.05372 | 0.71745  |
| 186 | 5 | 0.291032 | -0.07189 | 0.038232 | -0.05992 | 0.802553 | 0.220176 | 0.160278 | 0.074505 | 0.00877  | 0.536271 |
| 188 | 5 | 0.081942 | -0.19676 | -0.04319 | 0.300826 | 0.857179 | 0.001247 | 0.195605 | -0.00257 | -0.01362 | 0.819339 |
| 193 | 5 | -0.03471 | 0.151421 | -0.33448 | 0.199074 | 1.0187   | -0.071   | 0.181324 | 0.022071 | -0.06936 | 0.936964 |

---



Table S15

| Source | Region           | Location          | Sample size |
|--------|------------------|-------------------|-------------|
| Wild   | Central Yunnan   | Songming, Kunming | 20          |
|        |                  | Jiangchuan, Yuxi  | 20          |
|        | Western Yunnan   | Weixi, Diqing     | 20          |
|        |                  | Fugong, Nujiang   | 20          |
|        | Northwest Yunnan | Longyang, Baoshan | 16          |
|        |                  | Yunlong, Dali     | 20          |
|        | Southeast Yunnan | Mingzi, Honghe    | 20          |
|        |                  | Jianshan, Wenshan | 20          |
|        | Southwest Yunnan | Mojiang, Pu'er    | 20          |
|        |                  | Yunxian, Lincang  | 20          |
